# Supplementary material for: First genomic insights into the Mandevilla genus
Source: Front Plant Sci. 2022 Aug 16;13:983879. doi: 10.3389/fpls.2022.983879 (PMC9426028; doi:10.3389/fpls.2022.983879)
Supplement: Supplementary file 1 [file Table_1.XLSX]

## Sheet: Table S7
Supplementary Table 9. ITS1-based haplotypes reconstructed for the 55 Mandevilla accessions. Samples are organized in two subgroups based on the rbcL sequence alingment: pink samples shared a "C" in position 575, blue samples shared a "A" in the same position. Predicted parental genotypes for each polymorphic positions are reported. Parental genotypes discriminating the two samples groups are hig…
	ITS1															rbcL		Best hit (blastN) for ITS sequence	Similarity (%)	Query coverage
Polymorphic positions	31	35	78	88	100	114	115	117	130	163	200	203	207	210	223	575
Parental genotypes	CT x CC	AT x TT	CT x TT	CT x CT	TT x CT	AG x GG	TT x TG	GC x GC	AC x AC	CT x CC	CT x CC	CT x TT	AA x AG	AG x AA	TC x TT
2032	C	T	T	T	T	G	T	C	C	C	C	T	A	A	T	C		KY483907.1 (Mandevilla atroviolacea)	96,753	1
2031	C	T	T	T	T	G	T	C	C	C	C	T	A	A	T			KY483907.1 (Mandevilla atroviolacea)	96,753	1
2022	C	T	T	Y	Y	G	K	G	M	C	C	T	R	A	T			KY483907.1 (Mandevilla atroviolacea)	97,78	1
2013	C	T	Y	T	T	G	T	G	C	C	C	T	A	R	Y			KY483907.1 (Mandevilla atroviolacea)	96,104	1
2009	C	T	Y	T	T	G	T	S	C	C	C	T	A	R	Y			KY483907.1 (Mandevilla atroviolacea)	95,779	1
2055	C	T	Y	T	T	G	T	S	C	C	C	T	A	R	Y			KY483907.1 (Mandevilla atroviolacea)	95,779	1
2020	C	T	Y	Y	Y	R	K	G	M	Y	C	T	R	R	Y			KY483907.1 (Mandevilla atroviolacea)	95,455	1
2018	C	W	T	C	Y	R	K	G	A	Y	C	T	R	A	T			KY483907.1 (Mandevilla atroviolacea)	96,753	1
2028	C	W	T	C	Y	R	K	G	A	Y	Y	T	R	A	T			KY483907.1 (Mandevilla atroviolacea)	96,429	1
2012	Y	T	T	T	T	G	T	C	C	C	C	T	A	R	T			KY483907.1 (Mandevilla atroviolacea)	96,104	1
2024	Y	T	T	T	T	G	T	S	C	C	C	T	A	R	T			KY483907.1 (Mandevilla atroviolacea)	96,104	1
2033	Y	T	T	Y	Y	G	K	S	M	C	C	Y	R	R	T			KY483907.1 (Mandevilla atroviolacea)	95,779	1
2049	Y	T	T	Y	Y	R	K	S	M	C	C	T	R	R	T			KY483907.1 (Mandevilla atroviolacea)	95,779	1
2010	Y	T	T	Y	Y	R	K	S	M	Y	C	T	R	R	T			KY483907.1 (Mandevilla atroviolacea)	95,455	1
2021	Y	T	T	Y	Y	R	K	S	M	Y	C	T	R	R	T			KY483907.1 (Mandevilla atroviolacea)	95,455	1
2026	Y	T	T	Y	Y	R	K	S	M	Y	C	T	R	R	T			KY483907.1 (Mandevilla atroviolacea)	95,455	1
2047	Y	T	T	Y	Y	R	K	S	M	Y	C	T	R	R	T			KY483907.1 (Mandevilla atroviolacea)	95,455	1
2053	Y	T	T	Y	Y	R	K	S	M	Y	C	T	R	R	T			KY483907.1 (Mandevilla atroviolacea)	95,455	1
2052	Y	T	T	Y	Y	R	K	S	M	Y	C	T	R	R	T			KY483907.1 (Mandevilla atroviolacea)	95,455	1
2050	Y	T	T	Y	Y	R	K	S	M	Y	C	T	R	R	T			KY483907.1 (Mandevilla atroviolacea)	95,455	1
2023	Y	T	Y	T	T	G	T	S	C	C	C	T	A	G	Y			KY483907.1 (Mandevilla atroviolacea)	95,455	1
2019	Y	W	T	Y	T	G	T	S	M	C	C	T	A	R	T			KY483907.1 (Mandevilla atroviolacea)	95,779	1
2007	Y	W	T	Y	Y	G	K	S	M	C	Y	T	R	R	T			KY483907.1 (Mandevilla atroviolacea)	95,455	1
2046	Y	W	T	Y	Y	G	K	S	M	C	Y	T	R	R	T			KY483907.1 (Mandevilla atroviolacea)	95,455	1
2051	Y	W	T	Y	Y	G	K	S	M	C	Y	T	R	R	T			KY483907.1 (Mandevilla atroviolacea)	95,455	1
Parental genotypes	CT x CC	AT x TT	TT x TT	CC x CT	CC x CT	AG x GG	GG x TG	GG x GC	AA x AC	CT x CC	CT x CC	CT x TT	GG x AG	AG x AA	TT x TT
2040	C	T	T	C	C	R	G	G	A	Y	C	Y	G	A	T	A		KY483907.1 (Mandevilla atroviolacea)	97,727	1
2044	C	T	T	C	C	R	G	G	A	Y	C	Y	G	A	T			KY483907.1 (Mandevilla atroviolacea)	97,727	1
2017	C	T	T	C	C	R	K	G	A	Y	C	T	G	A	T			KY483907.1 (Mandevilla atroviolacea)	97,727	1
2054	C	T	T	C	Y	G	G	G	A	C	C	Y	G	A	T			KY483907.1 (Mandevilla atroviolacea)	98,52	1
2005	C	T	T	C	Y	R	K	G	A	Y	C	T	G	A	T			KY483907.1 (Mandevilla atroviolacea)	97,403	1
2011	C	T	T	C	Y	R	K	G	A	Y	C	T	G	A	T			KY483907.1 (Mandevilla atroviolacea)	97,403	1
2035	C	T	T	C	Y	R	K	G	A	Y	C	T	G	A	T			KY483907.1 (Mandevilla atroviolacea)	97,403	1
2015	C	W	T	C	Y	G	K	G	A	C	C	T	R	A	T			KY483907.1 (Mandevilla atroviolacea)	97,403	1
2016	C	W	T	C	Y	G	K	G	A	C	C	Y	R	A	T			KY483907.1 (Mandevilla atroviolacea)	97,78	1
2006	C	W	T	C	Y	R	K	G	A	Y	Y	T	G	A	T			KY483907.1 (Mandevilla atroviolacea)	96,753	1
2002	C	W	T	C	Y	R	K	G	A	Y	Y	T	R	A	T			KY483907.1 (Mandevilla atroviolacea)	96,429	1
2003	C	W	T	C	Y	R	K	G	A	Y	Y	T	R	A	T			KY483907.1 (Mandevilla atroviolacea)	96,429	1
2004	C	W	T	C	Y	R	K	G	A	Y	Y	T	R	A	T			KY483907.1 (Mandevilla atroviolacea)	96,429	1
2008	C	W	T	C	Y	R	K	G	A	Y	Y	T	R	A	T			KY483907.1 (Mandevilla atroviolacea)	96,429	1
2025	C	W	T	C	Y	R	K	G	A	Y	Y	T	R	A	T			KY483907.1 (Mandevilla atroviolacea)	96,429	1
2029	C	W	T	C	Y	R	K	G	A	Y	Y	T	R	A	T			KY483907.1 (Mandevilla atroviolacea)	96,429	1
2037	C	W	T	C	Y	R	K	G	A	Y	Y	T	R	A	T			KY483907.1 (Mandevilla atroviolacea)	96,429	1
2014	C	W	T	C	Y	R	K	G	A	Y	Y	T	R	A	T			KY483907.1 (Mandevilla atroviolacea)	96,429	1
2001	C	W	T	Y	Y	R	K	G	M	Y	Y	T	R	A	T			KY483907.1 (Mandevilla atroviolacea)	95,779	1
2034	Y	T	T	Y	Y	G	K	S	M	C	C	Y	R	R	T			KY483907.1 (Mandevilla atroviolacea)	95,779	1
2038	Y	T	T	Y	Y	G	K	S	M	C	C	Y	R	R	T			KY483907.1 (Mandevilla atroviolacea)	95,779	1
2043	Y	T	T	Y	Y	G	K	S	M	C	C	Y	R	R	T			KY483907.1 (Mandevilla atroviolacea)	95,779	1
2039	Y	T	T	Y	Y	R	K	S	M	Y	C	T	G	R	T			KY483907.1 (Mandevilla atroviolacea)	95,779	1
2027	Y	T	T	Y	Y	R	K	S	M	Y	C	T	R	R	T			KY483907.1 (Mandevilla atroviolacea)	95,455	1
2036	Y	T	T	Y	Y	R	K	S	M	Y	C	T	R	R	T			KY483907.1 (Mandevilla atroviolacea)	95,455	1
2042	Y	T	T	Y	Y	R	K	S	M	Y	C	T	R	R	T			KY483907.1 (Mandevilla atroviolacea)	95,455	1
2045	Y	T	T	Y	Y	R	K	S	M	Y	C	T	R	R	T			KY483907.1 (Mandevilla atroviolacea)	95,455	1
2048	Y	T	T	Y	Y	R	K	S	M	Y	C	T	R	R	T			KY483907.1 (Mandevilla atroviolacea)	95,455	1
2030	Y	W	T	Y	Y	G	K	S	M	C	Y	T	R	R	T			KY483907.1 (Mandevilla atroviolacea)	95,455	1
2041	Y	W	T	Y	Y	G	K	S	M	C	Y	T	R	R	T			KY483907.1 (Mandevilla atroviolacea)	95,455	1
W = A o T
Y = C o T
K = T o G
S = G o C
M = A o C
R = A o G
