# Supplementary material for: First genomic insights into the Mandevilla genus
Source: Front Plant Sci. 2022 Aug 16;13:983879. doi: 10.3389/fpls.2022.983879 (PMC9426028; doi:10.3389/fpls.2022.983879)
Supplement: Supplementary file 3 [file Table_3.XLSX]

## Sheet: Table S4
Supplementary Table 2. Primer pairs randomly designed on the newly assembled genome of Mandevilla and able to amplify as many SSR loci. For each SSR locus, SSR name, SSR-containing contig, location of each SSR-containing contig mapped onto the Coffea arabica genome, primer sequences, mean SSR locus size, melting temperatures, anchor used and SSR motif are reported.
SSR	SSR-containing Contig	Coffea Accession	Coffea Chr	Primer F	Primer R	Marker Size	Forward primer Tm (°C)	Reverse primer Tm (°C)	Anchor	Motif
SSR_01	jcf7180007709438	NC_039901.1	Chr_2e	CCCCTCAAGCTTCACAATTA	TCCATTTGAACTTCATGGGA	268	55.3	54.5	PAN1	(TG)11
SSR_02	jcf7180007709990	NC_039915.1	Chr_9e	ATTTGTTTGCAACCTCCATG	CCGCAACTCAAACTCAAATT	327	55	55.1	PAN1	(GAA)7
SSR_03	jcf7180007711233	NC_039913.1	Chr_8c	GAAAACCAAAATCCTCCAGC	GATGGTGTGGGAATTGAGTA	282	55.1	54.7	PAN2	(CTT)10
SSR_04	jcf7180007715403	NC_039901.1	Chr_2e	ACGAGGAAGACCAAGAAAAG	AACTACTAACCGAACCGAAC	306	55.3	55.2	PAN2	(AG)20
SSR_05	jcf7180007717710	NC_039901.1	Chr_2e	AGCCTTGTGTGTGGAATAAT	ATGTAAACAATGACCCCTCC	258	54.9	55	PAN3	(AT)10
SSR_06	jcf7180007726993	NC_039905.1	Chr_4e	GAGATACATAAGCAGGGCAT	TATGCAACATCTTCAGGAGG	395	54.7	54.8	PAN2	(TCT)8
SSR_07	jcf7180007766194	NC_039906.1	Chr_5e	GATCTCAATCCTGGACTCAC	GGTACTCATAAGCCAACCAA	120	55	55	PAN2	(ATT)8
SSR_08	jcf7180007780515	NC_039904.1	Chr_4c	CCTAGACTGCACCATCAATT	TGGATAGGTCTTGGTCTTTT	359	55.1	53.5	PAN3	(TC)27(AC)20
SSR_09	jcf7180007780963	NC_039917.1	Chr_10c	CTCAAGGTGTTTAATGTGCC	AGCTTATTACATACACCCTCT	335	54.9	53.4	PAN3	(CA)10
SSR_10	jcf7180007782136	NC_039906.1	Chr_5e	AACGCTCCTAAGTTGAAAGA	CTTCATCTCAACCTCCATCC	185	54.6	55.2	PAN3	(GA)16
SSR_11	jcf7180007784713	NC_039905.1	Chr_4e	TTACCTTGTTCGCAGCTTAT	ATTTTCACATGCATCACACC	233	55.1	54.8	PAN3	(TC)11
SSR_12	jcf7180007787041	NC_039912.1	Chr_8e	TGAAATAAAGGGTTAGGGCA	TCACTAATCCAGACAATCACA	153	54.2	54.3	PAN3	(GA)10
SSR_13	jcf7180007788101	NC_039899.1	Chr_1e	GTTTCCATACCAAATAGCACC	CCTCAAGACTGCACATAAAC	266	54.9	54.3	M13	(CT)11
SSR_14	jcf7180007788340	NC_039898.1	Chr_1c	CCCTTGCCTTCTTATGGTTT	ATGGAAAAGGCACACTGAAA	199	55.6	55.7	PAN2	(TG)11
SSR_15	jcf7180007796376	NC_039910.1	Chr_7c	TGAGGCACATACCATAGAGA	AATTTCTTGTCGTGGGCTAT	223	55	55	PAN3	(TTG)7
SSR_16	jcf7180007805205	NC_039910.1	Chr_7c	ATTCCTCCTCTCTCATCTCC	TGAAAATCAGCAGCAAAGC	103	55.1	54.9	M13	(CAA)7
SSR_17	jcf7180007815209	NC_039908.1	Chr_6c	CTTTCTGCCTTTACTCCCTTA	ATATCGGAACTCAGGACGT	149	54.9	55.2	PAN1	(AAT)7
SSR_18	jcf7180007826207	NC_039900.1	Chr_2c	ATGAATTGAAGTTGCCGCA	ATCCTAATCTCCCCACTCTG	300	56.1	55.4	M13	(TAA)18
SSR_19	jcf7180007832353	NC_039899.1	Chr_1e	TTGGGCACTTTCTCATTTGA	CAGGTCTGTTGGCATCATATA	257	55.4	55.2	PAN2	(CTT)9
SSR_20	jcf7180007832392	NC_039906.1	Chr_5e	TTCCCATTAAAGCACTTGGT	AAAGCCACTCATCATGCATA	231	55.1	55.1	PAN2	(GAG)8
SSR_21	jcf7180007832681	NC_039911.1	Chr_7e	GCAAGGAATCTAGAAACCGA	GTTTTGTTGGAAAGGGAAGG	334	55.2	55	PAN2	(AT)10
SSR_22	jcf7180007833586	NC_039912.1	Chr_8e	ATTTTGATTGCAGTTCCCAC	GATGGAGGAAGAGAAGATGG	403	54.7	54.6	PAN3	(GA)11
SSR_23	jcf7180007833885	NC_039904.1	Chr_4c	GATTCCAATTCCGACTAGCT	TCGAACTGGGGAATTAACAA	324	54.9	54.6	M13	(ATT)9
SSR_24	jcf7180007835344	NC_039902.1	Chr_3c	CTCTGGACATGAGTTACACT	CTTAGATAGTGCCAGTGACC	201	54.1	55	M13	(CTA)7
SSR_25	jcf7180007835353	NC_039902.1	Chr_3c	CACAAGGTTAAGAGGAAGCA	GATTAAGTGATGGGGTGAGG	271	55.3	55.2	PAN3	(TC)13(TA)19
SSR_26	jcf7180007835394	NC_039900.1	Chr_2c	CTCGGTGCAAGGATAAACT	TTGATTGAAAAGGAATGGTCG	216	54.9	54.8	PAN2	(ATA)7
SSR_27	jcf7180007837431	NC_039905.1	Chr_4e	AGTTCAATAGCGAGGACATT	GGAAAACTGCTATTTGTGCT	223	54.5	54.5	M13	(AC)10
SSR_28	jcf7180007837577	NC_039916.1	Chr_10e	GAGATCAATGAGGATGGGAC	CACTTACAGTTTCAGGTCCT	415	55	54.6	M13	(TGA)7
SSR_29	jcf7180007837889	NC_039907.1	Chr_5c	TCTACATTCTCTTCCGCATG	GATTAAGATCCATCCCTCCTG	417	55	54.9	PAN1	(TAA)7
SSR_30	jcf7180007735964	NC_039916.1	Chr_10e	CAACACCTATACCTCACACC	GAGTTTGTAGTCTCCAACCTT	233	55.2	55.2	M13	(AG)18
SSR_31	jcf7180007740007	NC_039905.1	Chr_4e	CCAATGGCAGCAATTAAACT	TGCAACAGGTTTCAAGTTTC	363	54.8	54.9	M13	(TA)11(TG)9
SSR_32	jcf7180007747705	NC_039908.1	Chr_6c	AGAGTCAATTTAGGGGCAAC	GCAACTCCCTTTCCAATACT	294	55.3	55.3	PAN3	(TTC)8
SSR_33	jcf7180007748819	NC_039907.1	Chr_5c	AAGGGAGAAGTAAAAGCGAG	AACCCTAGCTCAATTCAACC	371	55.1	55.3	PAN1	(TC)10
SSR_34	jcf7180007748992	NC_039902.1	Chr_3c	TCTCCAATTAGCAGTACAAGG	TTAGACAGGGAGAGAGACAG	202	55	55	PAN1	(ATT)8
SSR_35	jcf7180007751476	NC_039900.1	Chr_2c	TGGTTTTCACATCAGACAGA	CCTGGTTCACATGTTCACTT	199	54.5	55.9	PAN3	(AT)12
SSR_36	jcf7180007778688	NC_039918.1	Chr_11c	TGTCCTTCCCACTATCTAGG	ATGTGAAATGTGCTTGCTTC	225	55	55.2	PAN1	(ATG)8
SSR_37	jcf7180007778859	NC_039918.1	Chr_11c	TGTCTCTTAATTCTCCGCTC	ATCACTTTTCTCCACACACA	270	54.6	54.8	PAN2	(AT)16
SSR_38	jcf7180007783504	NC_039913.1	Chr_8c	TCATCAGACGCTTTCACATA	CGTTACCTTTTCTTAGCTGC	246	54.5	54.7	PAN1	(GGT)7
SSR_39	jcf7180007787488	NC_039908.1	Chr_6c	CAAAGAAGCAAGTGTGTTCA	TGAGCGATGTATGTCAGAAG	356	54.7	55	PAN2	(GA)10
SSR_40	jcf7180007791249	NC_039900.1	Chr_2c	TGGACGAACTTGATACTACG	TGTTGAAAATCCCAGTCCAA	300	54.7	55.1	PAN1	(GCG)8
SSR_41	jcf7180007791459	NC_039907.1	Chr_5c	GCCTCTCAAGTCATTAGGTG	AGGGTACTAAGGATGGTCTAA	171	55.6	54.5	PAN2	(TA)12
SSR_42	jcf7180007795753	NC_039910.1	Chr_7c	GAATAAACAGCCCAGTCTCA	AGATACTTCCAATAGCTTGCA	107	55.1	54.7	PAN1	(AG)13
SSR_43	jcf7180007795935	NC_039898.1	Chr_1c	TCTGGGTTTCTATGTGAGGT	ACAGACAAAATGCCAACCTA	337	55.5	55.2	M13	(TC)10
SSR_44	jcf7180007805739	NC_039913.1	Chr_8c	TTAGGTGGTGCTCTCTTTTC	GCGAAGAACCCACAAAATTA	279	55	54.5	M13	(AT)7(AG)13
SSR_45	jcf7180007832196	NC_039919.1	Chr_11e	GTTGAAGTTGTGATTTTGACA	CAGTAACAATGTCTTCCCGT	281	53.2	55.4	PAN1	(TA)16
SSR_46	jcf7180007836687	NC_039900.1	Chr_2c	ATTAGGTTGGATCGGTTGTT	AAGGAAGGAGAGAAATGACG	308	54.6	54.8	PAN3	(AT)21
SSR_47	jcf7180007709660	NC_039913.1	Chr_8c	TGCTGCATTAATCACCTACA	GGCAGAAGAAGATTTGTCCA	157	54.7	55.6	M13	(TCT)7
SSR_48	jcf7180007709888	NC_039900.1	Chr_2c	CCGTGCCTCCTATGATTTAC	CTGACCATGCAATTACTCCT	187	55.7	55.1	M13	(TC)15
SSR_49	jcf7180007713200	NC_039910.1	Chr_7c	AGTGTTGGTGAAGTTTCTCA	GCAACCAAAGATCGTACATG	346	54.7	55.1	PAN1	(AT)11(GT)22
SSR_50	jcf7180007758368	NC_039900.1	Chr_2c	CATTCAGCACACAGTTCTTC	AGTCATCGTTGTGAAATGGA	138	54.9	55	M13	(TC)6TT(TC)13
SSR_51	jcf7180007788307	NC_039900.1	Chr_2c	TTGGTTCAGGTTTTCTAAGC	TGCTACTCTTCTTTGCTACA	198	53.7	54	PAN1	(GT)9(GA)11
SSR_52	jcf7180007789506	NC_039908.1	Chr_6c	TTTTCCGTGAATCCAGATCT	GAGATACAAAGTGAGGAGGC	168	54.4	55.3	PAN1	(CT)18
SSR_53	jcf7180007832341	NC_039912.1	Chr_8e	GAGGCACCTGTTAATATCAGT	CTGTAAGTTCGGAGTGTCAC	125	55.1	55.8	PAN3	(CTT)8
SSR_54	jcf7180007837875	NC_039911.1	Chr_7e	TGCTTTACTGATGAACACCA	GAGGGCTAGTTAGTCGATCT	150	54.9	55.6	PAN2	(TC)16GCTT(TC)5
SSR_55	jcf7180007783435	NC_039918.1	Chr_11c	TTTCAGCATAGGTTCGACAA	AAAGCCTGAATCTCCTCTTG	185	55	55	PAN2	(GA)10
SSR_56	jcf7180007837875	NC_039911.1	Chr_7e	ATGCTTAGTGGGCTTTCTTT	CATGCACCTGAGAGAAGATT	406	55.2	55.1	PAN1	(TC)16
SSR_57	jcf7180007837379	NC_039916.1	Chr_10e	TCAGTAGACACAGTATTGGTC	CAATCGGCAAATCAAGTACC	367	54.4	55.1	PAN3	(TA)14
SSR_58	jcf7180007783134	NC_039908.1	Chr_6c	AAGAAATTCTCCTTGCTCGT	GAGAGCCATTAGATGCAGAA	272	55	54.9	M13	(AT)20
SSR_59	jcf7180007758368	NC_039900.1	Chr_2c	ATTCAGCACACAGTTCTTCT	GTCTATGACGGAGAGAAACC	163	54.9	55	M13	(TC)13
SSR_60	jcf7180007838219	NC_039910.1	Chr_7c	CCCTAGAGACCTTTTCATCC	CGAGTGTCTTCAAGCCATTA	336	54.5	55.5	M13	(TCA)7
SSR_61	jcf7180007826352	NC_039900.1	Chr_2c	ACAAAGCTTCTCCATCTCAG	GGGTGACTTTCCTGCTAATT	413	55.1	55.3	PAN3	(TC)13
SSR_62	jcf7180007780415	NC_039915.1	Chr_9e	AGTTCAGTGGTGGAGTAAAG	TCGAAGAAGAAGAGCAAGAG	157	54.6	54.9	PAN2	(TA)15
SSR_63	jcf7180007830845	NC_039919.1	Chr_11e	ATAGGATGAAGCTAGGGACC	CTCGGTATTGGTTTCATTGC	230	55.5	55.1	PAN3	(AT)10
SSR_64	jcf7180007832341	NC_039912.1	Chr_8e	GGCACCTGTTAATATCAGTG	GATGGATGTAGAGGATGGTG	206	53.8	54.7	M13	(CTT)8
SSR_65	jcf7180007836976	NC_039903.1	Chr_3e	ACTGGACAAAGTATTCTCGG	GTGTTCAATGGCAAGTCAAA	394	54.8	55	PAN2	(TC)10
SSR_66	jcf7180007709888	NC_039900.1	Chr_2c	CGTGCCTCCTATGATTTACT	ATTACTCCTTGCTCTCCTCT	175	54.7	54.9	PAN1	(TC)15
SSR_67	jcf7180007740372	NC_039918.1	Chr_11c	TACTAATTCGTCGTTTGGCT	CTTTTAGGTCATTTGGTCCAA	115	54.8	54	PAN1	(CA)11
SSR_68	jcf7180007778809	NC_039901.1	Chr_2e	TAGGTTGGATCGGTTGTTG	TCCAATCAACTTATAGCCTCA	197	54.8	54	PAN3	(AT)10
SSR_69	jcf7180007789824	NC_039916.1	Chr_10e	GTGAATCATTAGAGATGCCTG	CACCATCCTTGTCACATTTT	146	54.2	54.1	M13	(AT)13
SSR_70	jcf7180007789824	NC_039916.1	Chr_10e	TATTGAGGTTTGGCTTTCGA	CATTAACACCCCTCTTGTCA	345	55	55	PAN1	(GA)12
SSR_71	jcf7180007778669	NC_039916.1	Chr_10e	CCTCTTCCGTTCTTCATCTT	CTTCAATCACCAAAACCTCC	317	54.8	54.5	PAN2	(CT)14
SSR_72	jcf7180007804000	NC_039901.1	Chr_2e	GTACCAATTTGAAAGGGCTC	ACCAACCAACTAGAAAACGA	255	54.6	54.8	PAN1	(TA)11
SSR_73	jcf7180007814923	NC_039901.1	Chr_2e	GACACAAGAAGTTAGGCAAA	TTTTATAACCCAGGAATCGGT	400	53.8	54.6	PAN3	(AT)12
SSR_74	jcf7180007836927	NC_039898.1	Chr_1c	GACGGATGCTCTTAATTCCT	GTGTACAGATCCCTACTTCC	253	54.9	54.3	M13	(AG)13
SSR_75	jcf7180007791812	NC_039905.1	Chr_4e	TGTAGAGCCCCTATATCCTG	CCTGTGTTTTCATTTGCTGT	324	54.9	55	PAN3	(CTT)10
SSR_76	jcf7180007795753	NC_039910.1	Chr_7c	AATAAACAGCCCAGTCTCAA	TTCTTCAATTTGCAGCCTTT	272	54.5	54.2	PAN3	(AG)13
SSR_77	jcf7180007710390	NC_039911.1	Chr_7e	AATCAAGTGGTAATTGGGAGT	TTGTGGTCCTCGTTTTAGTT	388	54.8	54.8	PAN1	(AT)10
SSR_78	jcf7180007831443	NC_039900.1	Chr_2c	TAATTCTCTCACCCGACAAC	TAGAAGAAGGAAAAGGGAGC	347	54.8	54.4	PAN2	(CTC)7
SSR_79	jcf7180007791856	NC_039905.1	Chr_4e	AGGCCTTGTTGATAGCTTTG	ACTTAGGAAAAGGGTGGTTG	384	56	55.1	M13	(AAT)9
SSR_80	jcf7180007780167	NC_039899.1	Chr_1e	CTTTGGATTTGAAAGCGGAA	CAAAGGTATGTCTCTGGGTC	421	54.8	55.2	PAN2	(GA)10
SSR_81	jcf7180007832953	NC_039898.1	Chr_1c	GTGAGTCTCCTGTCATCATC	GAAAATGTTCCCATCAGACA	418	55	53.5	M13	(AT)24
SSR_82	jcf7180007781690	NC_039912.1	Chr_8e	AAGCTTCGGATTGTTGTCAT	AGTCCTAGTTCGCTGTAGTA	220	55.6	54.7	PAN2	(TA)11
SSR_83	jcf7180007708458	NC_039905.1	Chr_4e	AACTATCTACCTTGCCTTGC	AGATTGGAAAGAGTTGCTGT	285	55.1	54.9	PAN1	(AAT)7
SSR_84	jcf7180007831940	NC_039900.1	Chr_2c	ACTGCCAAATCTACCATTGA	CCTTGGTCATTCATCGTCAA	293	54.6	55.8	PAN2	(ATA)16
SSR_85	jcf7180007792942	NC_039904.1	Chr_4c	TAAACTGGTTGTGATCTGCA	AGTACTTAGAATGTAGTGGCT	208	54.9	53.4	PAN1	(TG)10
SSR_86	jcf7180007782246	NC_039910.1	Chr_7c	GCTATTAGTTCCTGTGCGAA	CTATTGCGTGTACTTCCTCA	312	55.6	54.9	PAN1	(GT)10
SSR_87	jcf7180007752702	NC_039899.1	Chr_1e	TCCACCATAGCCCTATTACT	ACTCTAGGAAAGTTCAGTGG	301	54.7	54	PAN3	(TC)12(TA)17
SSR_88	jcf7180007761807	NC_039900.1	Chr_2c	ATCAAGAATCACACTCACCC	ACTAAGAAGAGAAGCCCAAC	419	55	54.7	PAN1	(TC)12AAAAACAACC(TA)13
SSR_89	jcf7180007719129	NC_039909.1	Chr_6e	AAACTGGGACCATACACATC	TTGACGTAACTGTTTGACCA	424	55	55.2	PAN3	(ACA)7
SSR_90	jcf7180007832549	NC_039904.1	Chr_4c	AACCACTCGCTCCTATATCA	TCTTGCTTTTCCCTTTTCCA	158	55.4	55.3	PAN3	(AAT)8
SSR_91	jcf7180007713571	NC_039916.1	Chr_10e	AGACTATGCTCACTCCAGAA	TACCCATTCCTTGCACTTAG	269	55.3	54.7	PAN2	(AAT)11
SSR_92	jcf7180007786935	NC_039898.1	Chr_1c	TTCGAAATATCCCAAATGAGG	CTTATTGTCCAGGTCTGCTT	131	53.7	55	PAN2	(CA)10
SSR_93	jcf7180007710799	NC_039904.1	Chr_4c	AAGATGAGAAGGAAGCAAAAT	GAAAAGCCCTCAGACATTTG	150	53.4	54.9	PAN1	(TA)13
SSR_94	jcf7180007750472	NC_039917.1	Chr_10c	GATGGCGTTTTCTTGTCTTT	CGAAGCACACAATATAACAGA	92	54.8	54.1	M13	(CA)15
SSR_95	jcf7180007789506	NC_039908.1	Chr_6c	ATTTTCCGTGAATCCAGATCT	TGAGAAGGGGTTGTTGTTG	139	55	55.2	PAN3	(CT)18
SSR_96	jcf7180007713200	NC_039910.1	Chr_7c	TGATCTCCTTGCCAATCATG	CCAAAGATCGTACATGACCA	307	55.5	55.2	M13	(AT)11(GT)22
SSR_97	jcf7180007756734	NC_039909.1	Chr_6e	AAGGTAAGGCACATGGATTT	TTTTGTTCCTCGCTAGTTCA	428	54.9	54.9	M13	(TAT)7
SSR_98	jcf7180007795935	NC_039899.1	Chr_1e	TCTTGTTCAGTATTGCTCCG	AGTAACTTGGAGTGCTGATG	446	55.5	55.1	PAN1	(TC)10
SSR_99	jcf7180007788307	NC_039900.1	Chr_2c	TTCCTTCTCCAATTTCACCC	CCAGGAGTTAATGTCAACCA	411	55.2	55	PAN2	(GA)11
SSR_100	jcf7180007834415	NC_039906.1	Chr_5e	TAGTTCTCGTTCGTTTGCTT	GCTCCTCATTTTGGACAGAT	401	55.4	55.4	M13	(AT)11
