# Supplementary material for: First genomic insights into the Mandevilla genus
Source: Front Plant Sci. 2022 Aug 16;13:983879. doi: 10.3389/fpls.2022.983879 (PMC9426028; doi:10.3389/fpls.2022.983879)
Supplement: Supplementary file 5 [file Table_5.XLSX]

## Sheet: Foglio2
Supplementary Table 4. BLASTp results obtained by using the predicted proteome of Mandevilla as a query to interrogate the proteomes of Coffea arabica and Coffea canephora (BLASTp+ v.2.3.0)
		Coffea arabica proteome							Coffea canephora proteome
Query (Mandevilla protein)	Query length	Subject	Subject length	identity (%)	Alignment length	evalue	bitscore		Subject	Subject length	identity (%)	Alignment length	evalue	bitscore
jcf7180007707876.g251	1097	XP_027093101.1_probable_LRR_receptor-like_serine/threonine-protein_kinase_At1g34110_[Coffea_arabica]	1085	83638	1094	0	1734		CDP01128.1	962	83.857	954	0	1500
jcf7180007707945.g287	806	XP_027099839.1_protein_transport_protein_Sec23A-like_[Coffea_arabica]	879	86376	756	0	1324		CDP17034.1	885	85.925	746	0	1298
jcf7180007707957.g295	372	XP_027123077.1_inorganic_pyrophosphatase_TTM1-like_[Coffea_arabica]	659	87032	347	0	630		CDO98511.1	659	87.032	347	0	630
jcf7180007707977.g311	850	XP_027070901.1_receptor-like_protein_kinase_FERONIA_[Coffea_arabica]	891	80536	858	0	1388		CDP06378.1	889	81.163	860	0	1392
jcf7180007707990.g315	311	XP_027117405.1_PTI1-like_tyrosine-protein_kinase_3_[Coffea_arabica]	360	87296	307	0	547		CDP20710.1	317	87.296	307	0	549
jcf7180007708001.g327	630	XP_027100071.1_inactive_leucine-rich_repeat_receptor-like_protein_kinase_CORYNE_isoform_X1_[Coffea_arabica]	397	76378	381	0	608		CDP18976.1	397	76.115	381	0	607
jcf7180007708027.g357	334	XP_027110006.1_molybdate-anion_transporter-like_[Coffea_arabica]	461	89521	334	0	620		CDP05020.1	461	89.82	334	0	623
jcf7180007708028.g359	1026	XP_027073205.1_protein_LONGIFOLIA_1-like_[Coffea_arabica]	1022	52245	1047	0	927		CDP02327.1	942	49.084	1037	0	823
jcf7180007708029.g360	397	XP_027094232.1_endoglucanase_10-like_[Coffea_arabica]	526	83791	364	0	612		CDP07412.1	526	83.516	364	0	611
jcf7180007708058.g380	440	XP_027094269.1_uncharacterized_protein_LOC113714563_[Coffea_arabica]	530	80420	429	0	751		CDP18868.1	530	80.42	429	0	750
jcf7180007708058.g381	375	XP_027093466.1_putative_12-oxophytodienoate_reductase_11_[Coffea_arabica]	381	80789	380	0	647		CDP10748.1	375	75.926	378	0	597
jcf7180007708071.g391	874	XP_027113834.1_U3_small_nucleolar_RNA-associated_protein_21_homolog_isoform_X1_[Coffea_arabica]	906	83510	849	0	1496		CDP17815.1	909	83.079	851	0	1486
jcf7180007708071.g392	560	XP_027113827.1_receptor-like_protein_EIX2_[Coffea_arabica]	1046	63727	601	0	741		CDP20765.1	1009	65.299	585	0	743
jcf7180007708081.g398	1397	XP_027112053.1_translocase_of_chloroplast_120,_chloroplastic-like_[Coffea_arabica]	1235	70323	1085	0	1380		CDO96937.1	1020	71.745	1037	0	1359
jcf7180007708102.g422	526	XP_027065879.1_pentatricopeptide_repeat-containing_protein_CRP1,_chloroplastic-like_[Coffea_arabica]	554	68856	472	0	629		CDP11622.1	555	68.017	469	0	607
jcf7180007708107.g426	693	XP_027115571.1_uncharacterized_protein_LOC113733398_[Coffea_arabica]	980	56358	692	0	691		CDP05111.1	947	54.493	690	0	657
jcf7180007708134.g437	444	XP_027126629.1_uncharacterized_protein_LOC113742831_isoform_X1_[Coffea_arabica]	1442	64509	479	0	592		CDP20054.1	1408	63.466	479	0	587
jcf7180007708134.g438	753	XP_027126629.1_uncharacterized_protein_LOC113742831_isoform_X1_[Coffea_arabica]	1442	63684	771	0	911		CDP20054.1	1408	59.403	771	0	816
jcf7180007708135.g439	1120	XP_027076506.1_DNA-directed_RNA_polymerase_II_subunit_1_[Coffea_arabica]	1850	90653	1134	0	1697		CDP01840.1	1585	93.036	1120	0	1758
jcf7180007708147.g450	565	XP_027111822.1_guanylate-binding_protein_3-like_[Coffea_arabica]	1073	77522	565	0	827		CDO99475.1	1071	77.522	565	0	827
jcf7180007708171.g460	456	XP_027077261.1_tRNA_threonylcarbamoyladenosine_dehydratase-like_isoform_X1_[Coffea_arabica]	457	86214	457	0	788		CDP01656.1	375	83.152	368	0	590
jcf7180007708174.g462	472	XP_027091705.1_abscisic_acid_8'-hydroxylase_3-like_[Coffea_arabica]	473	81663	469	0	804		CDP11373.1	473	81.876	469	0	805
jcf7180007708174.g463	594	XP_027091704.1_serine_decarboxylase-like_[Coffea_arabica]	500	85857	502	0	895		CDP11372.1	396	92.677	396	0	784
jcf7180007708175.g464	793	XP_027069440.1_pentatricopeptide_repeat-containing_protein_At4g30825,_chloroplastic-like_[Coffea_arabica]	942	71446	802	0	1160		CDO97252.1	832	22.704	784	1.15e-50	190
jcf7180007708182.g467	790	XP_027122792.1_dual_specificity_protein_phosphatase_PHS1-like_isoform_X2_[Coffea_arabica]	928	75323	697	0	1031		CDO98311.1	928	75.179	697	0	1029
jcf7180007708202.g484	1004	XP_027126185.1_1-phosphatidylinositol-3-phosphate_5-kinase_FAB1B-like_isoform_X1_[Coffea_arabica]	1839	58086	1045	0	1134		CDP03026.1	1795	67.615	1019	0	1312
jcf7180007708205.g486	307	XP_027065051.1_pyruvate_dehydrogenase_E1_component_subunit_beta-3,_chloroplastic-like_[Coffea_arabica]	403	94788	307	0	613		CDP06104.1	411	94.463	307	0	610
jcf7180007708207.g487	489	XP_027123526.1_uncharacterized_protein_LOC113740194_[Coffea_arabica]	1706	69421	484	0	640		CDP17494.1	1706	69.421	484	0	640
jcf7180007708208.g489	573	XP_027123810.1_anaphase-promoting_complex_subunit_8-like_[Coffea_arabica]	580	87835	559	0	1035		CDP14896.1	580	87.835	559	0	1036
jcf7180007708209.g490	471	XP_027091752.1_uncharacterized_protein_LOC113712495_[Coffea_arabica]	468	89384	471	0	818		CDP01229.1	468	89.597	471	0	819
jcf7180007708213.g493	625	XP_027105062.1_cysteine-rich_receptor-like_protein_kinase_25_[Coffea_arabica]	680	54740	654	0	702		CDP20318.1	678	54.128	654	0	693
jcf7180007708219.g502	424	XP_027078773.1_glucan_endo-1,3-beta-glucosidase_2-like_[Coffea_arabica]	495	87685	406	0	751		CDP01635.1	495	87.685	406	0	750
jcf7180007708232.g507	360	XP_027095027.1_uncharacterized_oxidoreductase_At4g09670-like_[Coffea_arabica]	360	74095	359	0	571		CDP01147.1	361	70.833	360	0	536
jcf7180007708233.g508	356	XP_027074966.1_kinesin-like_protein_KIN-14B_[Coffea_arabica]	1291	92683	328	0	574
jcf7180007708246.g516	1097	XP_027103675.1_pentatricopeptide_repeat-containing_protein_At5g52850,_chloroplastic-like_[Coffea_arabica]	706	65149	703	0	964		CDP05128.1	784	65.173	781	0	1071
jcf7180007708247.g518	312	XP_027069727.1_putative_GDP-L-fucose_synthase_2_[Coffea_arabica]	312	87821	312	0	583		CDP02881.1	312	86.218	312	0	574
jcf7180007708256.g532	770	XP_027069790.1_disease_resistance_protein_RGA2-like_[Coffea_arabica]	850	39136	833	0	547		CDP07780.1	937	41.277	705	2.35e-156	482
jcf7180007708257.g533	466	XP_027078905.1_serine_carboxypeptidase-like_25_[Coffea_arabica]	479	83402	482	0	814		CDP02317.1	471	84.355	473	0	820
jcf7180007708266.g542	675	XP_027097633.1_nucleolar_GTP-binding_protein_1-like_[Coffea_arabica]	672	91124	676	0	1222		CDP00207.1	672	90.976	676	0	1221
jcf7180007708267.g543	691	XP_027063967.1_cellulose_synthase-like_protein_E6_isoform_X1_[Coffea_arabica]	743	69899	691	0	1048		CDP13703.1	677	69.675	676	0	1021
jcf7180007708320.g569	470	XP_027102191.1_protein_UPSTREAM_OF_FLC-like_isoform_X2_[Coffea_arabica]	465	70488	410	0	526		CDP08997.1	465	70	410	0	522
jcf7180007708335.g578	548	XP_027069111.1_polyadenylate-binding_protein_7_[Coffea_arabica]	638	71661	554	0	798		CDP15322.1	638	71.661	554	0	786
jcf7180007708337.g579	675	XP_027072452.1_leucine-rich_repeat_receptor-like_protein_kinase_PXC1_[Coffea_arabica]	688	85586	666	0	1122		CDP15342.1	688	85.586	666	0	1122
jcf7180007708339.g582	597	XP_027065769.1_SNW/SKI-interacting_protein_A-like_[Coffea_arabica]	597	90787	597	0	1015		CDP03274.1	597	90.787	597	0	1015
jcf7180007708343.g585	414	XP_027085674.1_probable_serine/threonine-protein_kinase_PIX13_[Coffea_arabica]	418	83014	418	0	684		CDP14494.1	418	83.055	419	0	686
jcf7180007708346.g590	419	XP_027075104.1_MACPF_domain-containing_protein_At4g24290-like_isoform_X2_[Coffea_arabica]	607	80760	421	0	703		CDP16016.1	591	76.54	422	0	654
jcf7180007708351.g592	1123	XP_027074992.1_trafficking_protein_particle_complex_subunit_11-like_isoform_X2_[Coffea_arabica]	1179	69374	1182	0	1659		CDP01754.1	1160	69.539	1172	0	1660
jcf7180007708352.g594	377	XP_027078198.1_oligopeptide_transporter_7-like_[Coffea_arabica]	762	84179	335	0	611		CDP01884.1	762	84.776	335	0	615
jcf7180007708361.g607	613	XP_027122937.1_exocyst_complex_component_EXO84B-like_[Coffea_arabica]	775	86409	596	0	989		CDO97759.1	775	86.409	596	0	989
jcf7180007708362.g609	550	XP_027124828.1_putative_UPF0481_protein_At3g02645_[Coffea_arabica]	551	72727	550	0	804		CDO98196.1	551	72.364	550	0	800
jcf7180007708375.g615	303	XP_027115649.1_endonuclease_1-like_[Coffea_arabica]	307	88629	299	0	563		CDO99615.1	307	88.294	299	0	560
jcf7180007708377.g616	579	XP_027069558.1_signal_recognition_particle_receptor_subunit_alpha_[Coffea_arabica]	621	73736	613	0	851		CDP10246.1	621	74.388	613	0	835
jcf7180007708386.g619	653	XP_027108053.1_uncharacterized_protein_LOC113727867_[Coffea_arabica]	652	73030	660	0	925		CDP15183.1	652	73.03	660	0	925
jcf7180007708387.g620	450	XP_027107859.1_uncharacterized_protein_LOC113727736_isoform_X2_[Coffea_arabica]	756	72271	458	0	655		CDP17211.1	775	71.834	458	0	648
jcf7180007708388.g621	282	XP_027113307.1_auxin_response_factor_1_[Coffea_arabica]	661	88809	277	0	519		CDO97654.1	221	90.698	215	1.72e-145	411
jcf7180007708430.g643	346	XP_027102108.1_LOW_QUALITY_PROTEIN:_WD_repeat-containing_protein_LWD1_[Coffea_arabica]	346	96243	346	0	692		CDP16753.1	346	97.688	346	0	701
jcf7180007708441.g652	506	XP_027112750.1_uncharacterized_protein_LOC113731591_[Coffea_arabica]	543	68248	548	0	640		CDO97352.1	474	65.574	305	3.11e-92	292
jcf7180007708446.g656	294	XP_027117178.1_pirin-like_protein_[Coffea_arabica]	329	87372	293	0	551		CDP10355.1	283	75.427	293	4.13e-165	464
jcf7180007708458.g664	610	XP_027122130.1_probable_leucine-rich_repeat_receptor-like_protein_kinase_At1g68400_[Coffea_arabica]	629	69631	596	0	804		CDP17377.1	631	69.347	597	0	798
jcf7180007708460.g669	1317	XP_027081212.1_ATP-dependent_RNA_helicase_DEAH13_isoform_X1_[Coffea_arabica]	1364	67247	1322	0	1708		CDP09910.1	1329	66.943	1325	0	1698
jcf7180007708462.g670	561	XP_027112339.1_protein_TIC_62,_chloroplastic-like_[Coffea_arabica]	481	64108	482	0	542		CDO97093.1	481	64.523	482	0	541
jcf7180007708469.g674	576	XP_027097948.1_hydroxyproline_O-galactosyltransferase_GALT6-like_[Coffea_arabica]	655	76122	557	0	900		CDP00259.1	627	71.993	557	0	833
jcf7180007708471.g675	434	XP_027117035.1_AAA-ATPase_At3g50940-like_[Coffea_arabica]	551	68372	430	0	571		CDP10341.1	553	67.442	430	0	568
jcf7180007708513.g691	409	XP_027088285.1_nitrate_regulatory_gene2_protein-like_[Coffea_arabica]	719	75354	353	0	562		CDP14548.1	716	75.921	353	0	563
jcf7180007708522.g694	364	XP_027097604.1_serine/threonine-protein_kinase_AFC2-like_isoform_X1_[Coffea_arabica]	350	86648	352	0	632		CDP13250.1	432	86.648	352	0	631
jcf7180007708522.g696	637	XP_027098266.1_pentatricopeptide_repeat-containing_protein_At1g13040,_mitochondrial-like_isoform_X1_[Coffea_arabica]	522	72745	521	0	803		CDP20623.1	867	29.4	500	2.42e-71	249
jcf7180007708524.g698	516	XP_027103903.1_probable_aminotransferase_ACS12_[Coffea_arabica]	511	75483	518	0	758		CDP05289.1	511	75.29	518	0	756
jcf7180007708530.g701	797	XP_027115297.1_pentatricopeptide_repeat-containing_protein_At3g61520,_mitochondrial-like_[Coffea_arabica]	777	63398	724	0	930		CDP08758.1	777	63.398	724	0	929
jcf7180007708567.g716	600	XP_027074918.1_pentatricopeptide_repeat-containing_protein_At3g29230_[Coffea_arabica]	597	61849	595	0	787		CDP02272.1	597	63.007	592	0	798
jcf7180007708572.g722	488	XP_027119001.1_non-lysosomal_glucosylceramidase-like_[Coffea_arabica]	987	86184	456	0	781		CDO99439.1	724	85.965	456	0	785
jcf7180007708587.g737	741	XP_027118041.1_potassium_transporter_4-like_[Coffea_arabica]	821	83820	377	0	645		CDP19088.1	821	83.554	377	0	646
jcf7180007708587.g738	456	XP_027118046.1_inactive_glucose-1-phosphate_adenylyltransferase_small_subunit_2,_chloroplastic-like_isoform_X5_[Coffea_arabica]	484	63975	483	0	576		CDP19089.1	488	63.45	487	0	572
jcf7180007708597.g747	496	XP_027086994.1_two-component_response_regulator-like_PRR37_isoform_X1_[Coffea_arabica]	794	68431	510	0	622		CDP04335.1	794	68.431	510	0	621
jcf7180007708603.g749	675	XP_027121286.1_probable_linoleate_9S-lipoxygenase_5_[Coffea_arabica]	882	80296	675	0	1165		CDO99039.1	882	80.444	675	0	1164
jcf7180007708614.g752	382	XP_027091382.1_glutamate-1-semialdehyde_2,1-aminomutase,_chloroplastic-like_[Coffea_arabica]	477	89791	382	0	713		CDP10985.1	437	89.005	382	0	708
jcf7180007708615.g753	1056	XP_027097281.1_histone_acetyltransferase_HAC1-like_[Coffea_arabica]	1756	66432	995	0	1300		CDP16878.1	1782	63.957	1021	0	1261
jcf7180007708624.g758	338	XP_027114893.1_galactinol_synthase_2-like_[Coffea_arabica]	383	78402	338	0	561		CDP15228.1	335	77.551	343	0	557
jcf7180007708630.g762	567	XP_027111983.1_sorting_nexin_2B-like_isoform_X1_[Coffea_arabica]	586	76806	526	0	764		CDP09254.1	564	76.806	526	0	765
jcf7180007708648.g767	516	XP_027090031.1_phosphatidylinositol_4-phosphate_5-kinase_9-like_[Coffea_arabica]	435	74257	404	0	593		CDP15806.1	435	74.505	404	0	593
jcf7180007708726.g790	607	XP_027069982.1_laccase-4-like_[Coffea_arabica]	579	81833	611	0	1030		CDP06593.1	564	77.741	611	0	967
jcf7180007708727.g791	696	XP_027088985.1_pentatricopeptide_repeat-containing_protein_At2g21090-like_[Coffea_arabica]	895	63255	596	0	807		CDP04211.1	637	60.469	640	0	810
jcf7180007708733.g798	528	XP_027078821.1_protein_FREE1-like_[Coffea_arabica]	533	66920	526	0	653		CDP01863.1	508	64.829	526	0	650
jcf7180007708735.g799	857	XP_027110718.1_probably_inactive_leucine-rich_repeat_receptor-like_protein_kinase_IMK2_[Coffea_arabica]	852	81316	851	0	1333		CDP13963.1	852	81.316	851	0	1333
jcf7180007708739.g801	518	XP_027115582.1_cytokinin_hydroxylase-like_[Coffea_arabica]	526	72190	525	0	761		CDP05189.1	526	71.81	525	0	760
jcf7180007708743.g806	413	XP_027110827.1_auxin_transporter-like_protein_4_isoform_X1_[Coffea_arabica]	569	79952	414	0	660		CDP14046.1	474	80.392	408	0	659
jcf7180007708748.g808	592	XP_027087879.1_cationic_amino_acid_transporter_1-like_[Coffea_arabica]	598	81849	595	0	991		CDP05623.1	598	81.681	595	0	989
jcf7180007708754.g814	469	XP_027121308.1_LOW_QUALITY_PROTEIN:_FRIGIDA-like_protein_4a_[Coffea_arabica]	529	72023	529	0	749		CDO99060.1	228	67.544	228	1.77e-96	293
jcf7180007708758.g820	643	XP_027086980.1_uncharacterized_protein_LOC113708639_[Coffea_arabica]	1326	64417	652	0	796		CDP11270.1	1326	64.417	652	0	796
jcf7180007708760.g821	752	XP_027104567.1_ABC_transporter_G_family_member_6-like_[Coffea_arabica]	759	85658	760	0	1321		CDP00016.1	726	84.474	760	0	1303
jcf7180007708764.g823	358	XP_027076202.1_S-adenosylmethionine_decarboxylase_proenzyme-like_[Coffea_arabica]	361	68611	360	0	511		CDP00521.1	358	82.808	349	0	592
jcf7180007708771.g828	360	XP_027111266.1_uncharacterized_protein_LOC113730634_[Coffea_arabica]	370	78649	370	0	540		CDO99944.1	366	78.415	366	0	537
jcf7180007708778.g830	722	XP_027084580.1_aminopeptidase_M1_[Coffea_arabica]	882	83703	632	0	1090		CDP08301.1	882	83.703	632	0	1089
jcf7180007708779.g831	625	XP_027061742.1_peptidyl-prolyl_cis-trans_isomerase_CYP59-like_isoform_X1_[Coffea_arabica]	600	63782	624	0	734		CDP13608.1	600	64.136	619	0	731
jcf7180007708780.g832	919	XP_027066987.1_regulatory-associated_protein_of_TOR_1-like_isoform_X3_[Coffea_arabica]	1379	87582	910	0	1609		CDP06408.1	1381	87.39	912	0	1608
jcf7180007708801.g845	1018	XP_027100050.1_LOW_QUALITY_PROTEIN:_squamosa_promoter-binding-like_protein_1_[Coffea_arabica]	984	59904	1040	0	1104		CDP17026.1	1029	63.123	1044	0	1166
jcf7180007708811.g850	344	XP_027069635.1_GPI_mannosyltransferase_3-like_isoform_X1_[Coffea_arabica]	546	78299	341	0	543		CDP02902.1	546	78.006	341	0	541
jcf7180007708811.g851	391	XP_027070228.1_VAN3-binding_protein_[Coffea_arabica]	394	79644	393	0	570		CDP02901.1	398	79.695	394	0	575
jcf7180007708820.g853	377	XP_027083375.1_zinc_transporter_4,_chloroplastic-like_[Coffea_arabica]	405	81963	377	0	596		CDP08260.1	409	82.493	377	0	589
jcf7180007708834.g858	551	XP_027089326.1_berberine_bridge_enzyme-like_13_[Coffea_arabica]	550	78544	522	0	900		CDP12589.1	550	76.182	550	0	897
jcf7180007708834.g859	444	XP_027089659.1_tubulin_beta_chain_[Coffea_arabica]	446	99095	442	0	929		CDP12577.1	446	99.095	442	0	929
jcf7180007708835.g861	555	XP_027123152.1_pentatricopeptide_repeat-containing_protein_PNM1,_mitochondrial_[Coffea_arabica]	546	75357	560	0	823		CDP15250.1	546	75	560	0	822
jcf7180007708839.g863	360	XP_027091449.1_uncharacterized_oxidoreductase_At4g09670-like_[Coffea_arabica]	360	72145	359	0	554		CDP01147.1	361	68.889	360	0	533
jcf7180007708840.g865	707	XP_027104671.1_receptor-like_protein_53_[Coffea_arabica]	1001	44704	727	0	563		CDP08329.1	961	41.975	729	1.89e-163	499
jcf7180007708842.g866	385	XP_027106142.1_protein_RMD5_homolog_[Coffea_arabica]	405	72362	398	0	586		CDO97347.1	398	72.362	398	0	585
jcf7180007708844.g868	609	XP_027104648.1_cell_division_cycle_5-like_protein_[Coffea_arabica]	905	86762	627	0	1040		CDO99987.1	905	86.443	627	0	1035
jcf7180007708847.g869	1228	XP_027071496.1_E3_ubiquitin-protein_ligase_PRT6_isoform_X2_[Coffea_arabica]	2045	67606	1136	0	1489		CDP06611.1	2059	67.901	1134	0	1491
jcf7180007708860.g872	647	XP_027091290.1_pentatricopeptide_repeat-containing_protein_At1g71490_[Coffea_arabica]	712	64688	640	0	862		CDP00870.1	677	64.688	640	0	861
jcf7180007708877.g878	714	XP_027063827.1_uncharacterized_protein_LOC113690200_[Coffea_arabica]	956	63222	658	0	753		CDP15901.1	344	58.96	346	1.23e-110	342
jcf7180007708885.g883	370	XP_027120146.1_cytochrome_b561_and_DOMON_domain-containing_protein_At2g04850-like_[Coffea_arabica]	403	87500	368	0	676		CDO99367.1	403	87.5	368	0	676
jcf7180007708885.g884	620	XP_027089097.1_BTB/POZ_domain-containing_protein_At1g30440-like_[Coffea_arabica]	633	89593	615	0	1150		CDP05630.1	633	89.431	615	0	1148
jcf7180007708913.g891	481	XP_027072154.1_protein_kinase_and_PP2C-like_domain-containing_protein_isoform_X1_[Coffea_arabica]	654	75681	477	0	742		CDP06260.1	654	75.052	477	0	736
jcf7180007708918.g892	1203	XP_027113584.1_putative_disease_resistance_protein_RGA3_[Coffea_arabica]	1175	61993	1184	0	1466		CDP07631.1	1158	61.233	1184	0	1444
jcf7180007708929.g894	643	XP_027094181.1_THO_complex_subunit_5B-like_[Coffea_arabica]	813	76361	643	0	981		CDP01370.1	813	76.516	643	0	979
jcf7180007708957.g906	377	XP_027112176.1_DNA_replication_licensing_factor_MCM4_[Coffea_arabica]	835	73798	416	0	590		CDO97008.1	829	72.356	416	0	572
jcf7180007708999.g913	648	XP_027125740.1_ruBisCO_large_subunit-binding_protein_subunit_beta,_chloroplastic_[Coffea_arabica]	609	88264	605	0	1041		CDO97994.1	577	89.024	574	0	991
jcf7180007709002.g915	751	XP_027061494.1_pentatricopeptide_repeat-containing_protein_At3g06920-like_[Coffea_arabica]	899	73271	752	0	1180		CDP19072.1	899	73.067	750	0	1173
jcf7180007709005.g916	867	XP_027097000.1_receptor-like_protein_kinase_FERONIA_[Coffea_arabica]	890	62430	889	0	1060		CDP19885.1	895	61.788	895	0	1055
jcf7180007709008.g919	820	XP_027082100.1_pentatricopeptide_repeat-containing_protein_At1g79490,_mitochondrial-like_isoform_X1_[Coffea_arabica]	831	84717	831	0	1435		CDP15133.1	831	84.356	831	0	1429
jcf7180007709020.g932	538	XP_027093027.1_F-box_protein_At1g47056-like_[Coffea_arabica]	545	83824	544	0	905		CDP01289.1	545	83.64	544	0	905
jcf7180007709031.g934	647	XP_027126769.1_pentatricopeptide_repeat-containing_protein_At3g62470,_mitochondrial-like_[Coffea_arabica]	651	73879	647	0	971		CDO98040.1	651	74.04	651	0	975
jcf7180007709031.g935	577	XP_027126009.1_kinesin-like_protein_KIN-13B_[Coffea_arabica]	701	88042	577	0	1044		CDO98041.1	701	88.042	577	0	1046
jcf7180007709043.g945	653	XP_027063761.1_pentatricopeptide_repeat-containing_protein_At5g66631-like_[Coffea_arabica]	655	74613	646	0	978		CDP15872.1	655	74.768	646	0	978
jcf7180007709044.g946	588	XP_027106386.1_separase-like_isoform_X1_[Coffea_arabica]	2210	65653	559	0	740		CDO97522.1	2165	65.653	559	0	739
jcf7180007709059.g961	528	XP_027085457.1_neurochondrin_[Coffea_arabica]	685	65234	512	0	677		CDP18803.1	743	65.43	512	0	679
jcf7180007709070.g966	376	XP_027118067.1_guanine_nucleotide_exchange_factor_SPIKE_1_isoform_X2_[Coffea_arabica]	1844	75871	373	0	556		CDP19073.1	1844	75.603	373	0	551
jcf7180007709073.g972	698	XP_027091751.1_subtilisin-like_protease_SBT1.9_[Coffea_arabica]	764	56397	766	0	861		CDP01315.1	764	56.397	766	0	861
jcf7180007709106.g987	527	XP_027111919.1_plant-specific_TFIIB-related_protein_PTF2-like_[Coffea_arabica]	524	67176	524	0	756		CDO96782.1	524	66.603	524	0	748
jcf7180007709123.g997	453	XP_027121859.1_UDP-glycosyltransferase_89B2-like_[Coffea_arabica]	480	70946	444	0	629		CDO98535.1	480	70.88	443	0	650
jcf7180007709123.g998	481	XP_027125263.1_UDP-glycosyltransferase_89B2-like_[Coffea_arabica]	482	70000	480	0	679		CDO98535.1	480	70.293	478	0	695
jcf7180007709124.g999	475	XP_027089656.1_brefeldin_A-inhibited_guanine_nucleotide-exchange_protein_1-like_isoform_X2_[Coffea_arabica]	1279	90086	464	0	884		CDP14481.1	1724	90.086	464	0	882
jcf7180007709131.g1001	933	XP_027070274.1_phosphatidate_phosphatase_PAH1-like_isoform_X1_[Coffea_arabica]	909	63244	974	0	1145		CDP06669.1	730	59.605	708	0	771
jcf7180007709135.g1003	608	XP_027097423.1_pentatricopeptide_repeat-containing_protein_At1g59720,_chloroplastic/mitochondrial_[Coffea_arabica]	609	70000	610	0	900		CDP00269.1	609	70.328	610	0	903
jcf7180007709138.g1005	1011	XP_027079387.1_uncharacterized_protein_LOC113702394_[Coffea_arabica]	1051	54389	1048	0	1011		CDP19915.1	1017	53.78	1045	0	986
jcf7180007709149.g1009	759	XP_027126776.1_glutamate_receptor_2.7-like_[Coffea_arabica]	971	65979	776	0	1001		CDO97761.1	971	65.979	776	0	1000
jcf7180007709171.g1017	320	XP_027087372.1_1-aminocyclopropane-1-carboxylate_oxidase_[Coffea_arabica]	318	87975	316	0	553		CDP04457.1	318	87.975	316	0	553
jcf7180007709171.g1018	781	XP_027089228.1_protein_CLMP1-like_isoform_X1_[Coffea_arabica]	783	79844	769	0	1228		CDP04458.1	783	79.714	769	0	1226
jcf7180007709195.g1027	750	XP_027111513.1_pumilio_homolog_4-like_isoform_X2_[Coffea_arabica]	935	62214	786	0	893		CDO99771.1	980	57.444	806	0	805
jcf7180007709213.g1031	535	XP_027074230.1_T-complex_protein_1_subunit_zeta_1_[Coffea_arabica]	535	94019	535	0	1046		CDP02786.1	535	93.645	535	0	1041
jcf7180007709239.g1034	619	XP_027123138.1_E3_ubiquitin-protein_ligase_KEG-like_[Coffea_arabica]	622	70144	623	0	900		CDO98163.1	616	70.481	603	0	889
jcf7180007709239.g1035	316	XP_027126073.1_PTI1-like_tyrosine-protein_kinase_At3g15890_[Coffea_arabica]	374	92258	310	0	597		CDO98162.1	374	92.258	310	0	597
jcf7180007709301.g1045	417	XP_027110596.1_lysosomal_beta_glucosidase-like_[Coffea_arabica]	604	80529	416	0	700		CDP09157.1	604	80.529	416	0	700
jcf7180007709302.g1046	334	XP_027090042.1_probable_glucuronosyltransferase_Os03g0107900_[Coffea_arabica]	457	85623	313	0	568		CDP12008.1	457	85.623	313	0	568
jcf7180007709307.g1048	624	XP_027123881.1_HIPL1_protein-like_isoform_X1_[Coffea_arabica]	695	78057	597	0	993		CDP14902.1	695	77.722	597	0	986
jcf7180007709315.g1050	564	XP_027077052.1_lysine-specific_demethylase_JMJ25-like_[Coffea_arabica]	1086	65414	532	0	719		CDP19052.1	1106	65.414	532	0	719
jcf7180007709338.g1054	1181	XP_027105271.1_DNA-directed_RNA_polymerase_II_subunit_RPB2_isoform_X1_[Coffea_arabica]	1193	96141	1192	0	2405		CDO99545.1	1193	96.141	1192	0	2405
jcf7180007709373.g1060	419	XP_027072488.1_3-oxoacyl-[acyl-carrier-protein]_synthase_3_A,_chloroplastic-like_[Coffea_arabica]	402	84487	419	0	716		CDP02978.1	402	84.487	419	0	714
jcf7180007709374.g1061	643	XP_027105230.1_protein_RTF1_homolog_[Coffea_arabica]	631	80583	618	0	950		CDO99584.1	631	80.583	618	0	950
jcf7180007709376.g1064	829	XP_027110529.1_splicing_factor-like_protein_1_[Coffea_arabica]	843	78246	855	0	1105		CDP05352.1	843	77.427	855	0	1089
jcf7180007709377.g1065	548	XP_027115546.1_protein_IQ-DOMAIN_1-like_[Coffea_arabica]	530	72432	555	0	676		CDP08623.1	530	72.432	555	0	664
jcf7180007709385.g1071	1557	XP_027070431.1_FIP1[V]-like_protein_[Coffea_arabica]	1434	58209	1541	0	1447		CDO98767.1	1125	37.931	174	7.58e-19	93.2
jcf7180007709386.g1074	569	XP_027088687.1_LOW_QUALITY_PROTEIN:_laccase-2-like_[Coffea_arabica]	587	78058	556	0	901		CDP09087.1	587	77.518	556	0	899
jcf7180007709388.g1078	401	XP_027094266.1_protein_WALLS_ARE_THIN_1-like_[Coffea_arabica]	390	81959	388	0	642		CDP07454.1	360	78.684	380	0	597
jcf7180007709389.g1079	400	XP_027109989.1_metal-nicotianamine_transporter_YSL2-like_[Coffea_arabica]	677	85304	313	0	566		CDP05015.1	675	85.531	311	0	566
jcf7180007709402.g1087	529	XP_027094258.1_somatic_embryogenesis_receptor_kinase_2-like_[Coffea_arabica]	630	94555	551	0	1055		CDP01160.1	625	94.555	551	0	1054
jcf7180007709402.g1088	464	XP_027091793.1_IST1_homolog_[Coffea_arabica]	530	65385	494	0	543		CDP01161.1	530	65.587	494	0	545
jcf7180007709403.g1089	487	XP_027099375.1_putative_potassium_transporter_12_isoform_X1_[Coffea_arabica]	839	87269	487	0	896		CDP00184.1	730	81.725	487	0	829
jcf7180007709415.g1093	570	XP_027108096.1_glutamate--tRNA_ligase,_cytoplasmic-like_[Coffea_arabica]	736	83656	569	0	1009		CDP17749.1	736	83.831	569	0	1011
jcf7180007709424.g1098	812	XP_027126801.1_ATP-dependent_Clp_protease_ATP-binding_subunit_ClpA_homolog_CD4B,_chloroplastic_[Coffea_arabica]	923	97522	807	0	1595		CDO98310.1	923	97.522	807	0	1595
jcf7180007709428.g1102	439	XP_027110764.1_omega-hydroxypalmitate_O-feruloyl_transferase-like_[Coffea_arabica]	462	70295	441	0	640		CDP13991.1	448	70.068	441	0	639
jcf7180007709431.g1103	727	XP_027108056.1_putative_pentatricopeptide_repeat-containing_protein_At1g12700,_mitochondrial_[Coffea_arabica]	728	62500	728	0	915		CDP15182.1	728	62.5	728	0	914
jcf7180007709437.g1107	593	XP_027068219.1_serine/threonine-protein_kinase_Nek6-like_[Coffea_arabica]	646	67833	600	0	779		CDP10081.1	646	67.833	600	0	779
jcf7180007709439.g1110	328	XP_027093981.1_GDSL_esterase/lipase_At1g71691-like_[Coffea_arabica]	372	86280	328	0	588		CDP18864.1	327	86.28	328	0	586
jcf7180007709441.g1113	634	XP_027066954.1_5-methyltetrahydropteroyltriglutamate--homocysteine_methyltransferase_[Coffea_arabica]	765	68265	709	0	948		CDP10525.1	813	68.265	709	0	948
jcf7180007709450.g1121	550	XP_027080746.1_inactive_poly_[ADP-ribose]_polymerase_RCD1-like_isoform_X1_[Coffea_arabica]	584	52122	589	0	565		CDP18552.1	589	51.356	590	0	559
jcf7180007709461.g1127	561	XP_027079984.1_potassium_channel_AKT1-like_[Coffea_arabica]	888	82459	553	0	958		CDP04802.1	888	82.098	553	0	954
jcf7180007709463.g1128	342	XP_027068208.1_probable_polygalacturonase_[Coffea_arabica]	496	89474	342	0	650		CDP03054.1	496	89.474	342	0	650
jcf7180007709480.g1135	446	XP_027072129.1_uncharacterized_protein_LOC113696949_[Coffea_arabica]	1002	82353	442	0	751		CDP14259.1	1083	82.5	440	0	749
jcf7180007709482.g1136	462	XP_027070155.1_cycloartenol_Synthase_isoform_X2_[Coffea_arabica]	731	86698	421	0	789		CDP12480.1	758	86.461	421	0	787
jcf7180007709498.g1148	469	XP_027078810.1_GTP-binding_protein_At3g49725,_chloroplastic-like_[Coffea_arabica]	618	75693	469	0	640		CDP02639.1	618	75.48	469	0	639
jcf7180007709498.g1149	598	XP_027122809.1_putative_pentatricopeptide_repeat-containing_protein_At5g65820_[Coffea_arabica]	652	83893	596	0	1054		CDO98336.1	571	84.382	429	0	761
jcf7180007709498.g1150	729	XP_027078806.1_pentatricopeptide_repeat-containing_protein_At3g49740-like_[Coffea_arabica]	731	69008	726	0	1026		CDP02638.1	731	68.595	726	0	1014
jcf7180007709502.g1151	432	XP_027073718.1_protein_ROOT_PRIMORDIUM_DEFECTIVE_1-like_[Coffea_arabica]	423	74938	403	0	635		CDP01719.1	423	74.938	403	0	632
jcf7180007709546.g1175	629	XP_027127149.1_proton_pump-interactor_1-like_isoform_X1_[Coffea_arabica]	615	66667	642	0	697		CDP05926.1	515	70.334	509	0	649
jcf7180007709569.g1181	1081	XP_027096826.1_tRNA(adenine(34))_deaminase,_chloroplastic_[Coffea_arabica]	1261	47232	1084	0	757		CDP00542.1	585	54.441	349	3.93e-98	325
jcf7180007709576.g1188	413	XP_027063560.1_acyl-coenzyme_A_oxidase_3,_peroxisomal-like_[Coffea_arabica]	687	85472	413	0	748		CDP15892.1	675	85.956	413	0	754
jcf7180007709610.g1198	330	XP_027115206.1_U-box_domain-containing_protein_33-like_[Coffea_arabica]	931	80303	330	0	568		CDP08807.1	566	80.303	330	0	566
jcf7180007709612.g1199	484	XP_027095676.1_piriformospora_indica-insensitive_protein_2-like_[Coffea_arabica]	489	67152	481	0	613		CDP00557.1	453	68.791	455	0	602
jcf7180007709625.g1205	449	XP_027115180.1_LOW_QUALITY_PROTEIN:_uncharacterized_protein_LOC113733177_[Coffea_arabica]	443	81567	434	0	737		CDP08820.1	443	81.797	434	0	738
jcf7180007709635.g1211	672	XP_027080839.1_uncharacterized_protein_LOC113703610_[Coffea_arabica]	678	78120	681	0	1038		CDP12102.1	678	77.68	681	0	1035
jcf7180007709657.g1215	645	XP_027071177.1_TORTIFOLIA1-like_protein_2_[Coffea_arabica]	824	60726	606	0	737		CDP14229.1	763	64.464	560	0	736
jcf7180007709659.g1218	1104	XP_027113175.1_uncharacterized_protein_LOC113731879_[Coffea_arabica]	1177	45632	1076	0	870		CDO97570.1	1177	45.767	1075	0	878
jcf7180007709660.g1220	358	XP_027085458.1_hydroxyproline_O-arabinosyltransferase_1_isoform_X1_[Coffea_arabica]	385	79245	371	0	567		CDP18804.1	276	87.308	260	1.45e-161	457
jcf7180007709666.g1223	517	XP_027112247.1_3-ketoacyl-CoA_synthase_4-like_[Coffea_arabica]	518	84805	487	0	887		CDO97044.1	518	84.394	487	0	885
jcf7180007709667.g1224	340	XP_027083753.1_probable_indole-3-pyruvate_monooxygenase_YUCCA4_[Coffea_arabica]	349	82544	338	0	587		CDP04838.1	398	82.738	336	0	585
jcf7180007709685.g1234	529	XP_027121067.1_glyoxysomal_fatty_acid_beta-oxidation_multifunctional_protein_MFP-a-like_[Coffea_arabica]	726	89641	502	0	941		CDO98847.1	726	89.044	502	0	934
jcf7180007709704.g1240	538	XP_027099491.1_probable_inactive_receptor_kinase_At1g48480_[Coffea_arabica]	631	62338	539	0	645		CDP00835.1	765	62.36	534	0	639
jcf7180007709712.g1244	800	XP_027082119.1_putative_disease_resistance_protein_RGA1_[Coffea_arabica]	1000	45865	798	0	601		CDP11742.1	1095	44.59	841	0	608
jcf7180007709716.g1245	751	XP_027119174.1_putative_pentatricopeptide_repeat-containing_protein_At3g16890,_mitochondrial_[Coffea_arabica]	708	67536	690	0	931		CDO98791.1	708	67.246	690	0	926
jcf7180007709732.g1249	612	XP_027075620.1_DNA_ligase_6_[Coffea_arabica]	1779	62264	636	0	780		CDP02736.1	1390	62.319	621	0	754
jcf7180007709752.g1252	478	XP_027110774.1_putative_FBD-associated_F-box_protein_At5g56700_[Coffea_arabica]	464	76053	451	0	653		CDP14004.1	369	74.857	350	0	523
jcf7180007709755.g1253	349	XP_027080202.1_peroxisomal_acyl-coenzyme_A_oxidase_1-like_[Coffea_arabica]	664	88272	324	0	613		CDP09995.1	664	88.889	324	0	615
jcf7180007709830.g1268	504	XP_027070467.1_importin_subunit_alpha-9_isoform_X2_[Coffea_arabica]	524	78088	502	0	763		CDP06714.1	537	77.104	511	0	763
jcf7180007709842.g1269	721	XP_027073800.1_pentatricopeptide_repeat-containing_protein_At3g49710-like_[Coffea_arabica]	711	74064	721	0	1130		CDP02643.1	711	74.202	721	0	1130
jcf7180007709872.g1275	420	XP_027078248.1_wall-associated_receptor_kinase-like_14_[Coffea_arabica]	727	82701	422	0	709		CDP07589.1	692	73.669	338	0	533
jcf7180007709895.g1281	415	XP_027124833.1_von_Willebrand_factor_A_domain-containing_protein_DDB_G0286969-like_[Coffea_arabica]	736	61098	437	0	535		CDO97834.1	736	60.87	437	0	533
jcf7180007709987.g1294	512	XP_027093010.1_protein_disulfide-isomerase-like_[Coffea_arabica]	501	73474	426	0	668		CDP10927.1	501	73.474	426	0	668
jcf7180007710000.g1312	593	XP_027094638.1_long-chain-alcohol_oxidase_FAO2-like_[Coffea_arabica]	763	72586	580	0	891		CDP03771.1	766	71.966	585	0	891
jcf7180007710002.g1314	1166	XP_027091442.1_histone-lysine_N-methyltransferase_ATXR7_[Coffea_arabica]	1202	51344	1153	0	1056		CDP07236.1	1202	51.344	1153	0	1056
jcf7180007710003.g1315	456	XP_027126410.1_protein_ASPARTIC_PROTEASE_IN_GUARD_CELL_1-like_[Coffea_arabica]	494	62963	459	0	609		CDP20730.1	494	63.181	459	0	612
jcf7180007710005.g1317	371	XP_027126028.1_NADP-dependent_malic_enzyme,_chloroplastic-like_[Coffea_arabica]	645	88283	367	0	662		CDO97978.1	651	88.011	367	0	658
jcf7180007710006.g1319	698	XP_027065081.1_exocyst_complex_component_EXO70B1-like_isoform_X3_[Coffea_arabica]	1019	67639	720	0	903		CDP13575.1	947	63.542	480	0	553
jcf7180007710010.g1322	950	XP_027069148.1_gamma-tubulin_complex_component_3-like_isoform_X1_[Coffea_arabica]	943	80822	949	0	1550		CDP10165.1	944	80.611	949	0	1526
jcf7180007710011.g1323	702	XP_027116386.1_serine/threonine-protein_phosphatase_BSL1-like_isoform_X2_[Coffea_arabica]	793	82861	706	0	1150		CDP03570.1	883	82.955	704	0	1145
jcf7180007710011.g1324	779	XP_027127313.1_nodulin_homeobox-like_[Coffea_arabica]	1001	55479	584	0	577		CDP03568.1	912	53.528	581	6.12e-180	543
jcf7180007710012.g1325	1043	XP_027118184.1_putative_calcium-transporting_ATPase_13,_plasma_membrane-type_[Coffea_arabica]	1027	50144	1039	0	940		CDP20630.1	827	53.019	828	0	813
jcf7180007710013.g1326	690	XP_027099838.1_cullin-3A_[Coffea_arabica]	735	93179	689	0	1336		CDP00322.1	327	95.107	327	0	654
jcf7180007710015.g1327	618	XP_027084640.1_pentatricopeptide_repeat-containing_protein_At4g21065-like_[Coffea_arabica]	608	76052	618	0	987		CDP13497.1	608	76.052	618	0	988
jcf7180007710022.g1331	738	XP_027082813.1_subtilisin-like_protease_SBT1.5_[Coffea_arabica]	797	70350	742	0	1085		CDP15554.1	797	70.907	739	0	1090
jcf7180007710023.g1332	1780	XP_027111784.1_callose_synthase_11-like_[Coffea_arabica]	1776	80867	1777	0	2940		CDO99540.1	1776	80.698	1777	0	2929
jcf7180007710023.g1333	926	XP_027108759.1_uncharacterized_protein_LOC113728563_[Coffea_arabica]	926	59484	891	0	1034		CDO99539.1	926	59.596	891	0	1035
jcf7180007710025.g1335	289	XP_027082603.1_T-complex_protein_1_subunit_beta-like_[Coffea_arabica]	527	95156	289	0	571		CDP15566.1	640	94.81	289	0	570
jcf7180007710029.g1336	808	XP_027124951.1_pentatricopeptide_repeat-containing_protein_At1g25360-like_[Coffea_arabica]	810	76456	807	0	1315		CDP19381.1	811	77.33	794	0	1306
jcf7180007710030.g1337	400	XP_027113275.1_uncharacterized_protein_LOC113731939_[Coffea_arabica]	398	77136	398	0	605		CDO97635.1	398	77.136	398	0	605
jcf7180007710032.g1339	601	XP_027116711.1_uncharacterized_protein_LOC113734384_[Coffea_arabica]	781	80976	615	0	983		CDP20298.1	781	80.976	615	0	983
jcf7180007710044.g1344	473	XP_027089603.1_probable_serine/threonine-protein_kinase_PBL7_[Coffea_arabica]	603	67179	390	0	528		CDP04243.1	547	59.057	530	0	567
jcf7180007710050.g1346	403	XP_027094291.1_uncharacterized_protein_LOC113714578_[Coffea_arabica]	412	71744	407	0	603		CDP03788.1	375	77.716	359	0	600
jcf7180007710050.g1347	823	XP_027071331.1_uncharacterized_protein_LOC113696154_[Coffea_arabica]	1505	59139	859	0	950		CDP03789.1	812	57.77	843	0	902
jcf7180007710055.g1350	617	XP_027110698.1_cation/H(+)_antiporter_4-like_isoform_X2_[Coffea_arabica]	692	49188	616	0	622		CDP13952.1	774	68.019	616	0	878
jcf7180007710065.g1357	475	XP_027086443.1_probable_aspartyl_protease_At4g16563_[Coffea_arabica]	414	81401	414	0	677		CDP09958.1	501	38.095	420	2.21e-72	240
jcf7180007710070.g1361	761	XP_027083480.1_protein_CNGC15b-like_[Coffea_arabica]	753	78069	725	0	1134		CDP07230.1	676	81.764	669	0	1105
jcf7180007710092.g1375	414	XP_027079934.1_ankyrin_repeat-containing_protein_At5g02620-like_[Coffea_arabica]	418	63357	423	0	523		CDP13442.1	418	62.884	423	0	521
jcf7180007710111.g1379	434	XP_027062647.1_uncharacterized_protein_LOC113689014_[Coffea_arabica]	436	80046	436	0	696		CDP13752.1	436	80.505	436	0	697
jcf7180007710111.g1380	1347	XP_027062642.1_protein_TORNADO_1-like_[Coffea_arabica]	1376	77585	1383	0	2221		CDP13751.1	1376	77.44	1383	0	2218
jcf7180007710120.g1383	629	XP_027106573.1_pentatricopeptide_repeat-containing_protein_At2g44880-like_[Coffea_arabica]	593	73109	595	0	934		CDP09441.1	559	73.477	558	0	877
jcf7180007710123.g1384	832	XP_027076878.1_protein_DDB_G0268328-like_[Coffea_arabica]	1654	82692	832	0	1386		CDP12869.1	3262	82.692	832	0	1382
jcf7180007710127.g1386	311	XP_027125960.1_coatomer_subunit_beta'-1_[Coffea_arabica]	918	97735	309	0	645		CDO98070.1	926	97.087	309	0	644
jcf7180007710132.g1389	1349	XP_027091234.1_lysine-specific_histone_demethylase_1_homolog_3-like_[Coffea_arabica]	2030	73568	1309	0	1866		CDP07432.1	1960	73.568	1309	0	1866
jcf7180007710136.g1390	707	XP_027119825.1_uncharacterized_protein_LOC113736849_[Coffea_arabica]	930	61892	719	0	813		CDO98796.1	930	61.613	719	0	810
jcf7180007710141.g1394	464	XP_027103399.1_probable_glucan_endo-1,3-beta-glucosidase_A6_[Coffea_arabica]	466	71949	467	0	692		CDO96794.1	446	70.236	467	0	668
jcf7180007710142.g1395	1263	XP_027087870.1_LRR_receptor-like_serine/threonine-protein_kinase_GSO1_[Coffea_arabica]	1261	79758	1240	0	1932		CDP04099.1	1143	69.803	1116	0	1471
jcf7180007710153.g1397	537	XP_027096818.1_uncharacterized_protein_LOC113716621_[Coffea_arabica]	536	76154	520	0	768		CDP21840.1	536	76.641	518	0	770
jcf7180007710171.g1407	465	XP_027087671.1_uncharacterized_protein_LOC113709088_isoform_X3_[Coffea_arabica]	453	70789	469	0	664		CDP09004.1	476	71.002	469	0	661
jcf7180007710174.g1408	931	XP_027117904.1_formin-like_protein_2_[Coffea_arabica]	955	67603	926	0	1042		CDP08062.1	888	65.98	923	0	1006
jcf7180007710179.g1409	467	XP_027061469.1_vacuolar_protein_8_[Coffea_arabica]	471	68085	470	0	632		CDP13738.1	467	68.094	467	0	644
jcf7180007710183.g1410	425	XP_027073826.1_F-box/kelch-repeat_protein_At1g55270_[Coffea_arabica]	437	91667	420	0	824		CDP17358.1	437	91.667	420	0	824
jcf7180007710193.g1416	516	XP_027124552.1_uncharacterized_protein_LOC113741254_isoform_X3_[Coffea_arabica]	620	75842	505	0	788		CDO98281.1	645	72.727	528	0	766
jcf7180007710234.g1432	510	XP_027070294.1_cytochrome_P450_94C1-like_[Coffea_arabica]	512	78643	501	0	839		CDP15392.1	475	81.897	464	0	816
jcf7180007710260.g1446	430	XP_027126910.1_synaptotagmin-5-like_[Coffea_arabica]	825	77594	424	0	694		CDO98425.1	825	77.123	424	0	690
jcf7180007710262.g1447	623	XP_027096770.1_putative_1-phosphatidylinositol-3-phosphate_5-kinase_FAB1C_[Coffea_arabica]	1712	73445	595	0	890		CDP00755.1	1712	73.277	595	0	888
jcf7180007710264.g1448	490	XP_027084379.1_4-coumarate--CoA_ligase-like_6_[Coffea_arabica]	573	72211	493	0	745		CDP11727.1	573	72.617	493	0	749
jcf7180007710290.g1456	373	XP_027079308.1_bifunctional_aspartate_aminotransferase_and_glutamate/aspartate-prephenate_aminotransferase-like_[Coffea_arabica]	488	89431	369	0	691		CDP01418.1	488	89.431	369	0	692
jcf7180007710302.g1459	801	XP_027105536.1_uncharacterized_protein_LOC113726171_[Coffea_arabica]	676	47853	815	0	659		CDO96807.1	675	47.73	815	0	657
jcf7180007710360.g1483	518	XP_027078636.1_xyloglucan_galactosyltransferase_XLT2-like_[Coffea_arabica]	531	63690	504	0	663		CDP02546.1	528	63.492	504	0	662
jcf7180007710362.g1485	965	XP_027070503.1_probable_sucrose-phosphate_synthase_[Coffea_arabica]	1052	84647	977	0	1649		CDP10465.1	1049	84.135	977	0	1632
jcf7180007710390.g1489	481	XP_027079253.1_RNA_demethylase_ALKBH9B-like_[Coffea_arabica]	520	70779	462	0	645		CDP01909.1	520	70.563	462	0	644
jcf7180007710397.g1493	548	XP_027064319.1_uncharacterized_protein_LOC113690552_[Coffea_arabica]	1613	45672	670	0	557
jcf7180007710399.g1495	623	XP_027110436.1_LRR_receptor-like_serine/threonine-protein_kinase_ERL1_[Coffea_arabica]	982	79568	602	0	984		CDP05285.1	948	79.402	602	0	980
jcf7180007710413.g1498	1336	XP_027084566.1_protein_transport_protein_SEC16B_homolog_isoform_X2_[Coffea_arabica]	1491	74941	846	0	1250		CDP09971.1	998	75.059	846	0	1247
jcf7180007710425.g1503	813	XP_027121086.1_ABC_transporter_C_family_member_4-like_[Coffea_arabica]	1522	74874	792	0	1232		CDO98864.1	1020	75.095	791	0	1233
jcf7180007710431.g1504	543	XP_027121161.1_squamosa_promoter-binding-like_protein_7_[Coffea_arabica]	811	69548	509	0	713		CDO98939.1	781	69.352	509	0	717
jcf7180007710436.g1507	414	XP_027108516.1_protein_trichome_birefringence-like_25_isoform_X2_[Coffea_arabica]	450	64967	451	0	587		CDP08706.1	450	64.967	451	0	587
jcf7180007710437.g1508	876	XP_027090956.1_pentatricopeptide_repeat-containing_protein_At3g09040,_mitochondrial-like_[Coffea_arabica]	1030	65831	878	0	1201		CDP12017.1	1032	65.984	879	0	1200
jcf7180007710449.g1510	343	XP_027071099.1_guanylate_kinase_2-like_isoform_X3_[Coffea_arabica]	424	76133	331	0	518		CDP18654.1	452	76.133	331	0	518
jcf7180007710462.g1513	509	XP_027125137.1_probable_methyltransferase_PMT2_[Coffea_arabica]	613	81800	511	0	913		CDP12320.1	1044	81.018	511	0	915
jcf7180007710466.g1515	649	XP_027091099.1_protein_CYPRO4-like_[Coffea_arabica]	648	83359	655	0	1107		CDP01358.1	648	83.359	655	0	1107
jcf7180007710476.g1517	911	XP_027115386.1_protein_ENHANCED_DISEASE_RESISTANCE_4-like_[Coffea_arabica]	926	58261	920	0	997		CDP08707.1	919	58.043	920	0	994
jcf7180007710478.g1518	505	XP_027077600.1_proline_dehydrogenase_2,_mitochondrial-like_isoform_X2_[Coffea_arabica]	505	68565	474	0	644		CDP02382.1	505	68.143	474	0	639
jcf7180007710484.g1519	902	XP_027089370.1_protein_BREAST_CANCER_SUSCEPTIBILITY_1_homolog_isoform_X1_[Coffea_arabica]	999	49081	925	0	798		CDP05653.1	1041	48.073	934	0	773
jcf7180007710503.g1523	513	XP_027116396.1_3-ketoacyl-CoA_synthase_11-like_[Coffea_arabica]	522	76392	521	0	832		CDO99138.1	521	77.5	520	0	859
jcf7180007710512.g1525	412	XP_027070654.1_probable_glycosyltransferase_At5g03795_[Coffea_arabica]	478	75980	408	0	673		CDP15333.1	444	75.676	407	0	671
jcf7180007710525.g1532	482	XP_027125439.1_zinc_finger_protein_ZAT9-like_isoform_X1_[Coffea_arabica]	552	62891	512	0	532		CDP18404.1	552	63.209	511	0	535
jcf7180007710530.g1536	380	XP_027109566.1_metal_tolerance_protein_B-like_[Coffea_arabica]	382	67979	381	0	513		CDP09115.1	382	67.717	381	1.15e-180	511
jcf7180007710562.g1544	391	XP_027070657.1_pyruvate_kinase_1,_cytosolic-like_[Coffea_arabica]	527	87080	387	0	696		CDP15340.1	527	87.597	387	0	700
jcf7180007710590.g1556	467	XP_027112816.1_serine/threonine-protein_kinase_PEPKR2-like_[Coffea_arabica]	493	75532	470	0	722		CDO97401.1	470	75.532	470	0	724
jcf7180007710591.g1557	671	XP_027068004.1_beta-galactosidase_15-like_[Coffea_arabica]	677	60831	674	0	842		CDP03052.1	828	60.979	674	0	842
jcf7180007710592.g1558	545	XP_027074870.1_KH_domain-containing_protein_At4g18375_[Coffea_arabica]	545	88991	545	0	947		CDP02247.1	560	88.807	545	0	944
jcf7180007710607.g1562	377	XP_027110582.1_uncharacterized_aarF_domain-containing_protein_kinase_At5g05200,_chloroplastic-like_[Coffea_arabica]	547	80547	329	0	549		CDP13889.1	547	80.243	329	0	548
jcf7180007710628.g1566	477	XP_027112539.1_cysteine_proteinase_RD21A-like_[Coffea_arabica]	463	80488	410	0	683		CDO97206.1	462	80	410	0	681
jcf7180007710637.g1568	405	XP_027093181.1_probable_1-acyl-sn-glycerol-3-phosphate_acyltransferase_4_isoform_X1_[Coffea_arabica]	376	78261	345	0	578		CDP07568.1	376	77.586	348	0	578
jcf7180007710647.g1574	670	XP_027094004.1_LOW_QUALITY_PROTEIN:_WD_repeat-containing_protein_70_[Coffea_arabica]	655	78203	679	0	1008		CDP03805.1	656	79.764	677	0	1040
jcf7180007710674.g1579	758	XP_027099747.1_methyl-CpG-binding_domain-containing_protein_9-like_[Coffea_arabica]	2174	58387	781	0	862		CDP00174.1	2173	58.003	781	0	856
jcf7180007710766.g1601	655	XP_027061052.1_uncharacterized_protein_LOC113687707_[Coffea_arabica]	1002	80828	652	0	1108		CDP13638.1	1002	80.368	652	0	1096
jcf7180007710779.g1602	495	XP_027111400.1_pyruvate_kinase_1,_cytosolic_[Coffea_arabica]	527	94322	317	0	618		CDO99844.1	527	94.006	317	0	617
jcf7180007710799.g1606	849	XP_027122787.1_auxin_response_factor_2A-like_[Coffea_arabica]	852	80282	852	0	1383		CDP19763.1	852	80.282	852	0	1383
jcf7180007710893.g1620	439	XP_027085756.1_protein_UNUSUAL_FLORAL_ORGANS_[Coffea_arabica]	438	80182	439	0	728		CDP18190.1	438	80.182	439	0	727
jcf7180007710920.g1625	326	XP_027078568.1_RNA-binding_protein_Musashi_homolog_2-like_[Coffea_arabica]	362	90000	330	0	578		CDP02498.1	355	87.879	330	0	558
jcf7180007710946.g1627	1249	XP_027114217.1_mediator_of_RNA_polymerase_II_transcription_subunit_15a-like_isoform_X1_[Coffea_arabica]	1412	70739	1285	0	1360		CDP19429.1	1398	68.182	1298	0	1373
jcf7180007710970.g1632	817	XP_027088440.1_probable_LRR_receptor-like_serine/threonine-protein_kinase_At3g47570_[Coffea_arabica]	992	45411	839	0	684		CDO96823.1	1015	45.961	916	0	726
jcf7180007711006.g1641	713	XP_027070651.1_histone-lysine_N-methyltransferase,_H3_lysine-9_specific_SUVH1-like_[Coffea_arabica]	729	80796	729	0	1179		CDP14340.1	729	80.796	729	0	1179
jcf7180007711010.g1649	694	XP_027086798.1_pentatricopeptide_repeat-containing_protein_At4g16390,_chloroplastic_[Coffea_arabica]	693	74855	692	0	1082		CDP04520.1	693	75	692	0	1079
jcf7180007711013.g1651	481	XP_027095060.1_uncharacterized_protein_LOC113715094_isoform_X2_[Coffea_arabica]	458	65558	421	0	541		CDP01293.1	405	65.764	406	0	529
jcf7180007711023.g1660	849	XP_027079328.1_glutamate_receptor_3.6-like_isoform_X1_[Coffea_arabica]	952	76678	849	0	1330		CDP01776.1	940	77.032	849	0	1314
jcf7180007711033.g1668	394	XP_027083187.1_zinc_finger_HIT_domain-containing_protein_2-like_[Coffea_arabica]	418	70380	395	0	560		CDP20969.1	418	70.38	395	0	561
jcf7180007711038.g1672	467	XP_027084446.1_BTB/POZ_domain-containing_protein_At3g44820-like_isoform_X1_[Coffea_arabica]	631	81081	444	0	776		CDP06996.1	633	81.081	444	0	776
jcf7180007711041.g1675	608	XP_027115523.1_CDPK-related_kinase_3-like_[Coffea_arabica]	608	88436	614	0	1085		CDP08633.1	608	87.948	614	0	1079
jcf7180007711049.g1677	692	XP_027078313.1_BTB/POZ_domain-containing_protein_NPY5-like_[Coffea_arabica]	623	79520	625	0	1040		CDP02592.1	623	79.84	625	0	1037
jcf7180007711059.g1684	660	XP_027078993.1_uncharacterized_protein_LOC113702160_isoform_X1_[Coffea_arabica]	609	81199	617	0	1047		CDP02721.1	383	38.636	176	9.18e-33	130
jcf7180007711071.g1695	820	XP_027075063.1_glycine-rich_domain-containing_protein_1-like_[Coffea_arabica]	857	68993	745	0	1070		CDP02680.1	853	68.456	745	0	1058
jcf7180007711071.g1696	679	XP_027085467.1_heat_shock_70_kDa_protein,_mitochondrial-like_[Coffea_arabica]	681	80556	684	0	1120		CDP02681.1	681	80.556	684	0	1120
jcf7180007711078.g1702	1117	XP_027117142.1_importin_beta-like_SAD2_isoform_X2_[Coffea_arabica]	1034	89157	830	0	1545		CDP19617.1	1034	89.157	830	0	1545
jcf7180007711079.g1703	361	XP_027091485.1_probable_cysteine_protease_RD19C_[Coffea_arabica]	376	82164	342	0	595		CDP07452.1	376	82.164	342	0	597
jcf7180007711084.g1706	662	XP_027091225.1_uncharacterized_protein_LOC113712134_[Coffea_arabica]	1230	72419	620	0	899		CDP07465.1	602	72.876	612	0	885
jcf7180007711094.g1711	569	XP_027083228.1_uncharacterized_protein_LOC113705535_isoform_X3_[Coffea_arabica]	610	58197	610	0	647		CDP12152.1	612	57.843	612	0	642
jcf7180007711095.g1712	479	XP_027111454.1_probable_pectate_lyase_12_[Coffea_arabica]	495	74684	474	0	703		CDP21395.1	495	74.895	474	0	704
jcf7180007711102.g1717	455	XP_027106592.1_arogenate_dehydratase/prephenate_dehydratase_6,_chloroplastic-like_[Coffea_arabica]	446	83406	458	0	759		CDP06978.1	446	83.624	458	0	761
jcf7180007711111.g1724	899	XP_027111196.1_putative_lysine-specific_demethylase_JMJ16_isoform_X1_[Coffea_arabica]	1268	68158	939	0	1233		CDO99990.1	1264	67.697	938	0	1224
jcf7180007711113.g1725	636	XP_027094943.1_putative_pentatricopeptide_repeat-containing_protein_At1g77010,_mitochondrial_[Coffea_arabica]	682	61493	683	0	847		CDP11976.1	682	61.64	683	0	852
jcf7180007711116.g1726	551	XP_027075362.1_probable_acyl-activating_enzyme_5,_peroxisomal_[Coffea_arabica]	590	79348	552	0	949		CDP01727.1	552	79.167	552	0	945
jcf7180007711129.g1730	389	XP_027076531.1_pentatricopeptide_repeat-containing_protein_At4g36680,_mitochondrial_[Coffea_arabica]	417	68293	410	0	563		CDP02821.1	417	68.049	410	0	561
jcf7180007711132.g1732	591	XP_027125111.1_pentatricopeptide_repeat-containing_protein_At5g61400-like_[Coffea_arabica]	672	65961	567	0	783		CDP19377.1	672	65.785	567	0	780
jcf7180007711142.g1736	1004	XP_027088760.1_ABC_transporter_B_family_member_9-like_[Coffea_arabica]	1261	55505	872	0	948		CDP19828.1	1189	51.95	872	0	863
jcf7180007711148.g1738	597	XP_027095722.1_urease-like_[Coffea_arabica]	837	88127	598	0	1089		CDP13318.1	837	88.127	598	0	1089
jcf7180007711164.g1747	788	XP_027099747.1_methyl-CpG-binding_domain-containing_protein_9-like_[Coffea_arabica]	2174	49644	842	0	676		CDP00174.1	2173	49.287	842	0	671
jcf7180007711179.g1749	752	XP_027074615.1_sister_chromatid_cohesion_protein_SCC2,_partial_[Coffea_arabica]	1736	80299	736	0	1217		CDP02288.1	1789	80.435	736	0	1220
jcf7180007711188.g1763	473	XP_027095668.1_uncharacterized_protein_LOC113715617_isoform_X1_[Coffea_arabica]	951	79317	498	0	793		CDP00780.1	965	77.344	512	0	786
jcf7180007711191.g1764	739	XP_027064889.1_GBF-interacting_protein_1-like_isoform_X2_[Coffea_arabica]	794	59264	734	0	770		CDP13693.1	816	57.616	755	0	761
jcf7180007711209.g1772	567	XP_027076496.1_LOW_QUALITY_PROTEIN:_pentatricopeptide_repeat-containing_protein_At3g02490,_mitochondrial-like_[Coffea_arabica]	598	71402	535	0	797		CDP02373.1	656	71.028	535	0	792
jcf7180007711215.g1774	594	XP_027110083.1_uncharacterized_protein_LOC113729936_[Coffea_arabica]	775	84874	595	0	1081		CDP05066.1	753	84.538	595	0	1054
jcf7180007711222.g1776	700	XP_027108902.1_CCR4-NOT_transcription_complex_subunit_1_[Coffea_arabica]	2417	83452	701	0	1170		CDP09482.1	2422	82.345	708	0	1164
jcf7180007711228.g1779	356	XP_027126366.1_lysM_domain_receptor-like_kinase_3_[Coffea_arabica]	664	87887	355	0	656		CDO97971.1	509	88.169	355	0	654
jcf7180007711233.g1783	595	XP_027083945.1_LOW_QUALITY_PROTEIN:_small_G_protein_signaling_modulator_1_[Coffea_arabica]	608	64583	624	0	683		CDP12222.1	551	70.973	596	0	764
jcf7180007711241.g1788	390	XP_027100659.1_2-methylene-furan-3-one_reductase-like_[Coffea_arabica]	393	81425	393	0	575		CDP00161.1	393	81.425	393	0	570
jcf7180007711246.g1791	355	XP_027070612.1_GDSL_esterase/lipase_At5g03820-like_isoform_X2_[Coffea_arabica]	352	82386	352	0	611		CDP15327.1	352	82.102	352	0	608
jcf7180007711253.g1796	457	XP_027108512.1_jasmonic_acid-amido_synthetase_JAR1-like_isoform_X1_[Coffea_arabica]	591	83259	448	0	790		CDP08709.1	398	83.168	404	0	707
jcf7180007711260.g1798	551	XP_027085200.1_transmembrane_9_superfamily_member_8-like_[Coffea_arabica]	649	87729	546	0	992		CDP07847.1	649	87.729	546	0	994
jcf7180007711284.g1804	341	XP_027073434.1_cystathionine_gamma-synthase_1,_chloroplastic_[Coffea_arabica]	552	79472	341	0	553		CDP02254.1	552	79.179	341	0	551
jcf7180007711290.g1807	552	XP_027115015.1_BEACH_domain-containing_protein_C2-like_[Coffea_arabica]	2660	78782	542	0	808		CDP17801.1	2592	78.782	542	0	810
jcf7180007711307.g1812	2041	XP_027063750.1_uncharacterized_protein_LOC113690126_isoform_X1_[Coffea_arabica]	1848	59871	1859	0	2024		CDP05959.1	1848	59.871	1859	0	2023
jcf7180007711317.g1817	654	XP_027109385.1_LOW_QUALITY_PROTEIN:_ATP-dependent_zinc_metalloprotease_FTSH_10,_mitochondrial-like_[Coffea_arabica]	821	88379	654	0	1162		CDP09082.1	821	88.532	654	0	1164
jcf7180007711324.g1820	418	XP_027061897.1_tabersonine_16-hydroxylase_2-like_[Coffea_arabica]	506	62470	413	0	540		CDP17724.1	508	62.136	412	0	521
jcf7180007711336.g1821	520	XP_027069806.1_fructokinase-like_1,_chloroplastic_[Coffea_arabica]	498	72676	527	0	756		CDP06530.1	503	72.865	527	0	758
jcf7180007711337.g1822	839	XP_027112396.1_uncharacterized_protein_LOC113731365_[Coffea_arabica]	1054	67453	848	0	1106		CDO97125.1	1054	67.453	848	0	1106
jcf7180007711342.g1824	772	XP_027099287.1_probable_beta-D-xylosidase_2_[Coffea_arabica]	842	83959	773	0	1343		CDO98788.1	770	67.984	759	0	1074
jcf7180007711363.g1838	696	XP_027095419.1_protein_NRT1/_PTR_FAMILY_4.6-like_isoform_X1_[Coffea_arabica]	582	77681	457	0	716		CDP00281.1	686	77.462	457	0	714
jcf7180007711394.g1849	711	XP_027081178.1_uncharacterized_protein_LOC113703879_[Coffea_arabica]	757	59270	712	0	764		CDP12023.1	689	54.916	712	0	677
jcf7180007711395.g1850	471	XP_027083913.1_flagellar_radial_spoke_protein_5-like_isoform_X2_[Coffea_arabica]	383	83969	393	0	693		CDP06951.1	301	88.026	309	0	570
jcf7180007711397.g1851	429	XP_027067903.1_zinc_protease_PQQL-like_isoform_X1_[Coffea_arabica]	1014	76242	463	0	704		CDP03209.1	1014	76.242	463	0	704
jcf7180007711400.g1854	452	XP_027078213.1_uncharacterized_protein_LOC113701657_[Coffea_arabica]	419	71599	419	0	645		CDP01630.1	452	66.962	451	0	639
jcf7180007711452.g1862	600	XP_027117367.1_uncharacterized_protein_LOC113734829_isoform_X1_[Coffea_arabica]	709	58740	635	0	699		CDO99123.1	679	55.748	635	0	637
jcf7180007711480.g1867	613	XP_027064453.1_kinesin-like_protein_KIN-14N_[Coffea_arabica]	803	85179	614	0	1049		CDP05808.1	803	85.016	614	0	1047
jcf7180007711499.g1872	343	XP_027108163.1_kinesin-like_protein_KIN-UB_isoform_X3_[Coffea_arabica]	890	76963	382	0	552		CDP17787.1	886	76.44	382	0	548
jcf7180007711547.g1889	688	XP_027098908.1_U3_small_nucleolar_RNA-associated_protein_14_homolog_A-like_[Coffea_arabica]	897	75110	683	0	1031		CDP17121.1	897	75.549	683	0	1009
jcf7180007711576.g1900	626	XP_027099711.1_uncharacterized_protein_LOC113718966_isoform_X1_[Coffea_arabica]	671	66883	462	0	578		CDP00606.1	655	66.21	438	0	561
jcf7180007711584.g1905	740	XP_027065105.1_probable_LRR_receptor-like_serine/threonine-protein_kinase_At1g56140_isoform_X2_[Coffea_arabica]	1044	63158	836	0	1022		CDP20736.1	1045	62.963	837	0	1017
jcf7180007711591.g1913	639	XP_027066494.1_pentatricopeptide_repeat-containing_protein_At1g31430-like_[Coffea_arabica]	641	73214	616	0	958		CDP03394.1	641	73.214	616	0	958
jcf7180007711607.g1916	1036	XP_027080382.1_uncharacterized_protein_LOC113703274_[Coffea_arabica]	975	83516	1001	0	1672		CDP12043.1	952	81.419	1001	0	1612
jcf7180007711621.g1921	1671	XP_027091312.1_protein_SABRE-like_[Coffea_arabica]	1985	78563	1600	0	2563		CDP00925.1	2641	78.563	1600	0	2563
jcf7180007711624.g1922	392	XP_027119753.1_polygalacturonase-like_[Coffea_arabica]	390	81122	392	0	665		CDP19165.1	390	80.102	392	0	660
jcf7180007711642.g1925	854	XP_027108034.1_pleiotropic_drug_resistance_protein_3-like_isoform_X6_[Coffea_arabica]	1346	64835	819	0	1016		CDO97981.1	1461	50.169	889	0	850
jcf7180007711644.g1926	296	XP_027088037.1_calcium-transporting_ATPase_4,_endoplasmic_reticulum-type-like_[Coffea_arabica]	1063	91611	298	0	538		CDP08974.1	1062	90.94	298	5.11e-180	528
jcf7180007711648.g1927	473	XP_027113226.1_ion_channel_DMI1_isoform_X1_[Coffea_arabica]	980	88651	467	0	817		CDO97603.1	956	88.651	467	0	814
jcf7180007711653.g1928	390	XP_027117591.1_uncharacterized_protein_LOC113734978_[Coffea_arabica]	392	68112	392	0	584		CDP03441.1	392	68.622	392	0	585
jcf7180007711653.g1929	495	XP_027117593.1_uncharacterized_protein_LOC113734979_[Coffea_arabica]	494	88259	494	0	895		CDP03440.1	494	88.259	494	0	895
jcf7180007711702.g1938	353	XP_027066248.1_exocyst_complex_component_EXO70A1-like_[Coffea_arabica]	635	84703	353	0	631		CDP10608.1	583	84.703	353	0	629
jcf7180007711719.g1942	585	XP_027119166.1_70_kDa_peptidyl-prolyl_isomerase-like_isoform_X2_[Coffea_arabica]	576	83074	579	0	986		CDP15134.1	576	83.42	579	0	988
jcf7180007711721.g1943	733	XP_027084476.1_protein_RRC1-like_isoform_X1_[Coffea_arabica]	972	86806	720	0	1232		CDP07871.1	972	86.806	720	0	1232
jcf7180007711730.g1944	459	XP_027115001.1_transmembrane_protein_184A-like_[Coffea_arabica]	418	89702	369	0	679		CDP17753.1	418	89.702	369	0	677
jcf7180007711738.g1948	445	XP_027068853.1_probable_RNA-dependent_RNA_polymerase_5_isoform_X2_[Coffea_arabica]	1051	65179	448	0	606		CDP03268.1	875	65.402	448	0	609
jcf7180007711742.g1949	564	XP_027094076.1_histone-lysine_N-methyltransferase_ASHH2-like_[Coffea_arabica]	1655	62243	535	0	625		CDP11932.1	1517	62.243	535	0	625
jcf7180007711804.g1967	351	XP_027063556.1_DEAD-box_ATP-dependent_RNA_helicase_53,_mitochondrial-like_isoform_X2_[Coffea_arabica]	626	82682	358	0	609		CDP16079.1	653	82.682	358	0	606
jcf7180007711854.g1975	678	XP_027070926.1_phenylalanine_ammonia-lyase_[Coffea_arabica]	711	78814	708	0	1143		CDP20698.1	674	75.282	708	0	1073
jcf7180007711878.g1983	649	XP_027067041.1_pentatricopeptide_repeat-containing_protein_At5g25630-like_isoform_X1_[Coffea_arabica]	630	70262	649	0	933		CDP03324.1	630	70.57	649	0	935
jcf7180007711915.g1986	936	XP_027065486.1_DNA_mismatch_repair_protein_MSH7_[Coffea_arabica]	1102	69467	881	0	1234		CDP03350.1	1098	69.783	877	0	1240
jcf7180007711951.g2001	1305	XP_027107378.1_mediator_of_RNA_polymerase_II_transcription_subunit_14-like_isoform_X3_[Coffea_arabica]	1819	78588	1303	0	1980		CDP06815.1	1791	78.459	1272	0	1927
jcf7180007712001.g2008	376	XP_027090281.1_transcription_termination_factor_MTEF18,_mitochondrial-like_[Coffea_arabica]	593	66757	370	0	520		CDP11939.1	580	66.757	370	0	520
jcf7180007712004.g2009	990	XP_027073074.1_eukaryotic_translation_initiation_factor-like_[Coffea_arabica]	799	76510	745	0	1150		CDP02830.1	799	76.242	745	0	1150
jcf7180007712034.g2014	530	XP_027061144.1_cytochrome_P450_CYP72A219-like_[Coffea_arabica]	515	68679	530	0	769		CDP19599.1	515	67.925	530	0	761
jcf7180007712121.g2029	473	XP_027061875.1_histidine_kinase_2-like_isoform_X2_[Coffea_arabica]	1175	63732	477	0	591		CDP20622.1	1251	63.883	479	0	597
jcf7180007712140.g2031	689	XP_027108165.1_myosin-9_isoform_X2_[Coffea_arabica]	938	69432	687	0	875		CDP17789.1	938	69.141	687	0	870
jcf7180007712164.g2034	1390	XP_027111117.1_uncharacterized_protein_LOC113730569_[Coffea_arabica]	1389	51439	1425	0	1168		CDP00011.1	1254	52.068	1233	0	1009
jcf7180007712165.g2035	872	XP_027066143.1_ATPase_8,_plasma_membrane-type_[Coffea_arabica]	884	89041	876	0	1587		CDO98206.1	956	81.87	877	0	1490
jcf7180007712176.g2037	409	XP_027080516.1_FCS-Like_Zinc_finger_10-like_[Coffea_arabica]	408	69175	412	0	545		CDP18437.1	394	67.92	399	0	513
jcf7180007712194.g2039	501	XP_027114035.1_pentatricopeptide_repeat-containing_protein_At2g13420,_mitochondrial-like_isoform_X1_[Coffea_arabica]	567	66983	527	0	696		CDP16451.1	548	66.603	527	0	695
jcf7180007712241.g2058	687	XP_027127325.1_heat_shock_70_kDa_protein_17_[Coffea_arabica]	917	79565	690	0	1135		CDP16043.1	838	80.702	627	0	1061
jcf7180007712290.g2065	1041	XP_027092180.1_TPR_repeat-containing_protein_ZIP4-like_[Coffea_arabica]	943	74074	945	0	1402		CDP03991.1	943	73.968	945	0	1405
jcf7180007712290.g2066	549	XP_027113543.1_FRIGIDA-like_protein_3_isoform_X1_[Coffea_arabica]	547	79053	549	0	889		CDP03992.1	619	79.053	549	0	886
jcf7180007712302.g2071	496	XP_027102874.1_transcription_factor_bHLH91-like_[Coffea_arabica]	491	68085	517	0	602		CDP09313.1	459	63.76	516	0	540
jcf7180007712380.g2092	297	XP_027112572.1_methylthioribose_kinase-like_[Coffea_arabica]	419	83618	293	0	531		CDO97228.1	419	83.276	293	0	531
jcf7180007712416.g2095	892	XP_027075633.1_probable_methyltransferase_PMT27_[Coffea_arabica]	923	63114	957	0	1149		CDP01948.1	793	74.93	710	0	1096
jcf7180007712430.g2097	682	XP_027121436.1_plastid_division_protein_CDP1,_chloroplastic-like_[Coffea_arabica]	837	71027	711	0	963		CDO98565.1	837	71.027	711	0	964
jcf7180007712504.g2101	553	XP_027112808.1_bifunctional_riboflavin_biosynthesis_protein_RIBA_1,_chloroplastic-like_[Coffea_arabica]	552	83364	547	0	961		CDO97412.1	552	82.998	547	0	955
jcf7180007712607.g2106	590	XP_027100239.1_LEAF_RUST_10_DISEASE-RESISTANCE_LOCUS_RECEPTOR-LIKE_PROTEIN_KINASE-like_2.4_isoform_X1_[Coffea_arabica]	637	53155	634	0	607		CDP00655.1	639	53.234	603	0	594
jcf7180007712658.g2115	272	XP_027115268.1_mitogen-activated_protein_kinase_homolog_MMK2_[Coffea_arabica]	378	96183	262	0	526		CDP20377.1	378	96.565	262	0	527
jcf7180007712837.g2125	562	XP_027080793.1_carotenoid_cleavage_dioxygenase_8_homolog_B,_chloroplastic-like_[Coffea_arabica]	558	82771	563	0	961		CDP08153.1	558	82.593	563	0	958
jcf7180007712839.g2127	473	XP_027123837.1_protein_EDS1-like_[Coffea_arabica]	606	74310	471	0	738		CDP14925.1	1071	74.31	471	0	739
jcf7180007712842.g2130	441	XP_027080448.1_protein_GPR107-like_[Coffea_arabica]	442	80698	430	0	679		CDP12235.1	440	80	430	0	671
jcf7180007712845.g2131	546	XP_027064392.1_scarecrow-like_transcription_factor_PAT1_[Coffea_arabica]	544	81170	547	0	911		CDP18907.1	544	81.17	547	0	911
jcf7180007712847.g2132	505	XP_027083044.1_uncharacterized_protein_LOC113705396_[Coffea_arabica]	482	79022	491	0	805		CDP16593.1	482	80.041	491	0	818
jcf7180007712847.g2133	463	XP_027084454.1_protein_NUCLEAR_FUSION_DEFECTIVE_4-like_[Coffea_arabica]	568	75269	465	0	672		CDP16594.1	566	75.594	463	0	676
jcf7180007712850.g2135	633	XP_027081715.1_protein_ETHYLENE_INSENSITIVE_3-like_[Coffea_arabica]	634	81633	637	0	1063		CDP19134.1	634	81.633	637	0	1081
jcf7180007712855.g2137	1564	XP_027103579.1_glutamate_synthase_1_[NADH],_chloroplastic-like_isoform_X1_[Coffea_arabica]	2216	88974	1560	0	2860		CDP05076.1	2216	88.974	1560	0	2859
jcf7180007712856.g2139	482	XP_027091486.1_uncharacterized_protein_LOC113712321_[Coffea_arabica]	500	75202	496	0	764		CDP10917.1	469	76.972	469	0	746
jcf7180007712857.g2140	460	XP_027078202.1_3-ketoacyl-CoA_synthase_6_[Coffea_arabica]	496	95652	460	0	920		CDP02779.1	496	95.435	460	0	919
jcf7180007712874.g2153	456	XP_027074546.1_cyclin-dependent_kinase_C-2-like_isoform_X1_[Coffea_arabica]	512	86433	457	0	795		CDP01460.1	512	86.214	457	0	792
jcf7180007712875.g2154	739	XP_027062507.1_putative_multidrug_resistance_protein_[Coffea_arabica]	1254	82337	719	0	1219		CDP05798.1	1254	82.615	719	0	1224
jcf7180007712899.g2160	825	XP_027106714.1_DDT_domain-containing_protein_PTM-like_isoform_X1_[Coffea_arabica]	1701	52516	775	0	755		CDP06993.1	1702	52.516	775	0	753
jcf7180007712900.g2161	667	XP_027092883.1_protein_LYK5-like_[Coffea_arabica]	676	58584	664	0	741		CDP11912.1	666	58.283	664	0	738
jcf7180007712906.g2163	361	XP_027110921.1_mannose-1-phosphate_guanylyltransferase_1_[Coffea_arabica]	361	93352	361	0	689		CDP00140.1	361	93.075	361	0	687
jcf7180007712911.g2166	623	XP_027095249.1_transport_inhibitor_response_1-like_protein_[Coffea_arabica]	642	82215	641	0	1046		CDP11468.1	642	82.371	641	0	1048
jcf7180007712912.g2167	471	XP_027077789.1_protein_artemis-like_[Coffea_arabica]	539	61474	475	0	570		CDP04690.1	539	61.053	475	0	564
jcf7180007712919.g2168	515	XP_027093892.1_myosin-6-like_isoform_X2_[Coffea_arabica]	1511	90763	498	0	967		CDP03822.1	1523	90.04	502	0	969
jcf7180007712926.g2170	471	XP_027116396.1_3-ketoacyl-CoA_synthase_11-like_[Coffea_arabica]	522	84713	471	0	845		CDO99138.1	521	84.501	471	0	846
jcf7180007712926.g2171	522	XP_027116396.1_3-ketoacyl-CoA_synthase_11-like_[Coffea_arabica]	522	79732	523	0	866		CDO99138.1	521	80.651	522	0	884
jcf7180007712939.g2179	408	XP_027068760.1_zinc_finger_CCCH_domain-containing_protein_20-like_[Coffea_arabica]	395	74696	411	0	548		CDP03218.1	395	74.453	411	0	545
jcf7180007712945.g2180	385	XP_027126660.1_autophagy-related_protein_16-like_[Coffea_arabica]	513	79839	372	0	621		CDP15089.1	592	79.301	372	0	617
jcf7180007712951.g2183	352	XP_027112793.1_phospho-2-dehydro-3-deoxyheptonate_aldolase_2,_chloroplastic-like_[Coffea_arabica]	521	92216	334	0	668		CDP20627.1	370	92.515	334	0	666
jcf7180007712952.g2184	512	XP_027070381.1_putative_E3_ubiquitin-protein_ligase_XBAT31_[Coffea_arabica]	440	68374	449	0	576		CDP06622.1	440	68.151	449	0	574
jcf7180007712953.g2185	762	XP_027067270.1_mechanosensitive_ion_channel_protein_10-like_isoform_X1_[Coffea_arabica]	615	63265	588	0	733		CDP03111.1	792	55.721	804	0	809
jcf7180007712983.g2195	611	XP_027079205.1_uncharacterized_protein_LOC113702280_[Coffea_arabica]	627	92982	570	0	1104		CDP01441.1	627	92.807	570	0	1103
jcf7180007713018.g2211	918	XP_027116375.1_putative_calcium-transporting_ATPase_13,_plasma_membrane-type_isoform_X1_[Coffea_arabica]	1057	50406	986	0	879		CDP20630.1	827	52.597	751	0	717
jcf7180007713041.g2214	387	XP_027084452.1_cationic_amino_acid_transporter_6,_chloroplastic-like_[Coffea_arabica]	581	86280	379	0	650		CDP08331.1	528	86.765	340	0	577
jcf7180007713067.g2224	576	XP_027088380.1_LOW_QUALITY_PROTEIN:_transcriptional_adapter_ADA2b-like_[Coffea_arabica]	521	53833	574	0	586		CDP04511.1	521	54.181	574	0	584
jcf7180007713085.g2232	657	XP_027103920.1_LRR_receptor-like_serine/threonine-protein_kinase_GSO1_[Coffea_arabica]	680	74594	677	0	996		CDP05303.1	649	75.697	646	0	974
jcf7180007713090.g2233	336	XP_027126308.1_pyrophosphate-energized_membrane_proton_pump_3_[Coffea_arabica]	800	89735	302	0	540		CDO97733.1	343	89.404	302	0	536
jcf7180007713110.g2248	400	XP_027097414.1_proline-rich_receptor-like_protein_kinase_PERK9_[Coffea_arabica]	798	73404	376	0	580		CDO98692.1	692	87.339	387	0	702
jcf7180007713114.g2249	507	XP_027074180.1_cytochrome_P450_CYP736A12-like_[Coffea_arabica]	498	70000	500	0	760		CDP12933.1	497	69.94	499	0	757
jcf7180007713119.g2250	602	XP_027111870.1_pyruvate_decarboxylase_1_[Coffea_arabica]	584	86711	602	0	1079		CDO96745.1	584	86.213	602	0	1072
jcf7180007713120.g2252	368	XP_027127248.1_uncharacterized_protein_LOC113743442_[Coffea_arabica]	392	72253	364	0	520		CDP13624.1	359	71.703	364	0	517
jcf7180007713124.g2255	719	XP_027124554.1_beta-galactosidase_[Coffea_arabica]	843	86617	665	0	1235		CDO97918.1	835	86.466	665	0	1211
jcf7180007713126.g2259	590	XP_027081927.1_SNF2_domain-containing_protein_CLASSY_4-like_isoform_X2_[Coffea_arabica]	1046	50596	587	0	560		CDP14473.1	1136	50.085	585	0	556
jcf7180007713131.g2261	556	XP_027111356.1_pleiotropic_drug_resistance_protein_2-like_[Coffea_arabica]	1478	86679	548	0	974		CDO99882.1	1478	86.131	548	0	967
jcf7180007713132.g2262	485	XP_027090844.1_uncharacterized_protein_LOC113711825_[Coffea_arabica]	476	70782	486	0	687		CDP01302.1	476	70.782	486	0	687
jcf7180007713147.g2268	696	XP_027098752.1_disease_resistance_protein_RPP13-like_isoform_X5_[Coffea_arabica]	1107	51489	705	0	699		CDP00736.1	822	54.489	646	0	672
jcf7180007713180.g2275	458	XP_027107414.1_UDP-glycosyltransferase_83A1-like_[Coffea_arabica]	462	66150	452	0	636		CDP20814.1	455	68.182	440	0	645
jcf7180007713183.g2276	308	XP_027064779.1_choline_transporter_protein_1-like_isoform_X1_[Coffea_arabica]	697	85667	300	0	554		CDP05904.1	374	88.699	292	0	556
jcf7180007713199.g2281	400	XP_027078838.1_protein_PIN-LIKES_7-like_[Coffea_arabica]	422	69596	421	0	587		CDP01772.1	422	69.359	421	0	586
jcf7180007713215.g2289	364	XP_027104692.1_dnaJ_protein_homolog_[Coffea_arabica]	416	92371	367	0	624		CDO99946.1	416	92.371	367	0	623
jcf7180007713238.g2296	638	XP_027068638.1_pollen_receptor-like_kinase_3_[Coffea_arabica]	650	51410	603	0	608		CDO97828.1	544	59.681	501	0	561
jcf7180007713241.g2297	384	XP_027092826.1_uncharacterized_protein_LOC113713323_[Coffea_arabica]	473	81481	351	0	607		CDP07583.1	660	81.481	351	0	611
jcf7180007713246.g2298	466	XP_027087515.1_ATP-dependent_6-phosphofructokinase_2_[Coffea_arabica]	498	79258	458	0	741		CDP04555.1	501	79.258	458	0	719
jcf7180007713276.g2304	790	XP_027082007.1_myosin-9-like_isoform_X2_[Coffea_arabica]	1171	66021	774	0	962		CDP09767.1	1089	60.456	746	0	794
jcf7180007713295.g2309	502	XP_027127721.1_probable_glycosyltransferase_At5g03795_[Coffea_arabica]	519	74851	505	0	779		CDP08577.1	509	73.453	501	0	748
jcf7180007713323.g2325	338	XP_027090079.1_transcription_factor_TGA7-like_[Coffea_arabica]	362	73109	357	0	534		CDP01171.1	362	73.389	357	0	537
jcf7180007713343.g2331	689	XP_027071325.1_protein_OCTOPUS-like_[Coffea_arabica]	712	74355	698	0	858		CDP06515.1	633	69.604	681	0	751
jcf7180007713377.g2339	338	XP_027073089.1_F-box/LRR-repeat_protein_At1g67190-like_[Coffea_arabica]	419	86982	338	0	599		CDP15407.1	419	86.686	338	0	597
jcf7180007713378.g2340	441	XP_027095295.1_poly_[ADP-ribose]_polymerase_1-like_isoform_X1_[Coffea_arabica]	986	66667	426	0	551		CDP03723.1	986	66.901	426	0	551
jcf7180007713390.g2343	547	XP_027121789.1_kinesin-like_protein_KIN-8A_isoform_X2_[Coffea_arabica]	782	83241	543	0	932		CDO98488.1	804	82.873	543	0	926
jcf7180007713395.g2344	456	XP_027104090.1_E3_ubiquitin-protein_ligase_RNFT1-like_[Coffea_arabica]	483	72124	452	0	645		CDP13877.1	459	71.685	445	0	630
jcf7180007713397.g2345	774	XP_027061151.1_G-type_lectin_S-receptor-like_serine/threonine-protein_kinase_At4g27290_[Coffea_arabica]	829	61893	782	0	976		CDP05828.1	818	60.591	779	0	942
jcf7180007713428.g2350	662	XP_027093596.1_uncharacterized_protein_LOC113714000_[Coffea_arabica]	1293	48837	774	0	702
jcf7180007713429.g2352	1362	XP_027095592.1_putative_late_blight_resistance_protein_homolog_R1B-17_[Coffea_arabica]	1491	42642	1393	0	951		CDP20153.1	1449	42.924	1286	0	918
jcf7180007713457.g2359	634	XP_027101154.1_E3_ubiquitin-protein_ligase_WAV3-like_[Coffea_arabica]	731	76766	637	0	987		CDP07090.1	731	76.923	637	0	988
jcf7180007713482.g2361	898	XP_027079212.1_PH,_RCC1_and_FYVE_domains-containing_protein_1-like_isoform_X2_[Coffea_arabica]	1103	90782	857	0	1528		CDP08456.1	1103	90.898	857	0	1529
jcf7180007713531.g2371	926	XP_027111656.1_pre-mRNA-splicing_factor_SYF1-like_isoform_X1_[Coffea_arabica]	928	89707	923	0	1707		CDO99648.1	926	89.514	925	0	1705
jcf7180007713540.g2374	758	XP_027081150.1_DNA-directed_RNA_polymerases_IV_and_V_subunit_2-like_[Coffea_arabica]	1205	70132	760	0	1106		CDP09677.1	1213	69.201	763	0	1088
jcf7180007713545.g2376	309	XP_027062592.1_uncharacterized_protein_LOC113688962_[Coffea_arabica]	299	88629	299	0	535		CDP05869.1	299	88.629	299	0	535
jcf7180007713548.g2379	783	XP_027123906.1_receptor-like_protein_kinase_[Coffea_arabica]	1133	56226	779	0	836		CDO97762.1	1106	55.969	779	0	823
jcf7180007713559.g2383	330	XP_027064628.1_protein_disulfide_isomerase-like_2-3_[Coffea_arabica]	436	84457	341	0	572		CDP05711.1	438	89.474	323	0	585
jcf7180007713564.g2385	446	XP_027073074.1_eukaryotic_translation_initiation_factor-like_[Coffea_arabica]	799	71287	404	0	570		CDP02830.1	799	70.792	404	0	566
jcf7180007713621.g2390	386	XP_027063755.1_nucleotide-sugar_uncharacterized_transporter_2-like_isoform_X1_[Coffea_arabica]	386	75711	387	0	591		CDP13694.1	386	76.227	387	0	595
jcf7180007713627.g2392	371	XP_027123267.1_gibberellin_3-beta-dioxygenase_1-like_[Coffea_arabica]	372	75936	374	0	595		CDP18939.1	372	76.203	374	0	595
jcf7180007713631.g2395	501	XP_027087297.1_uncharacterized_protein_LOC113708849_isoform_X4_[Coffea_arabica]	490	67134	499	0	633		CDP04561.1	468	66.456	474	0	587
jcf7180007713638.g2398	686	XP_027110953.1_L-type_lectin-domain_containing_receptor_kinase_S.4_[Coffea_arabica]	690	74711	692	0	999		CDP00126.1	689	74.24	691	0	992
jcf7180007713651.g2405	312	XP_027097574.1_gibberellin_receptor_GID1B-like_[Coffea_arabica]	344	87821	312	0	590		CDP03576.1	344	87.821	312	0	589
jcf7180007713661.g2408	422	XP_027062417.1_uncharacterized_protein_LOC113688816_isoform_X2_[Coffea_arabica]	428	86318	402	0	694		CDP13607.1	428	86.318	402	0	694
jcf7180007713681.g2413	1168	XP_027091598.1_ABC_transporter_B_family_member_13-like_[Coffea_arabica]	1259	81063	1167	0	1913		CDP07374.1	1259	81.063	1167	0	1932
jcf7180007713694.g2416	442	XP_027108825.1_COBRA-like_protein_1_[Coffea_arabica]	475	74820	417	0	664		CDO96959.1	442	62.356	433	0	539
jcf7180007713713.g2421	603	XP_027116480.1_DNA_repair_protein_RAD5B_isoform_X2_[Coffea_arabica]	1136	85406	603	0	1090		CDO99194.1	529	87.713	529	0	991
jcf7180007713789.g2435	425	XP_027103905.1_uncharacterized_protein_LOC113725115_[Coffea_arabica]	497	84404	436	0	733		CDP05291.1	496	84.404	436	0	733
jcf7180007713811.g2438	352	XP_027084822.1_probable_sugar_phosphate/phosphate_translocator_At1g12500_[Coffea_arabica]	351	92898	352	0	643		CDP09851.1	351	92.898	352	0	643
jcf7180007713818.g2439	438	XP_027117114.1_metal_tolerance_protein_2-like_isoform_X2_[Coffea_arabica]	523	70353	425	0	550		CDP03524.1	523	70.588	425	0	553
jcf7180007713845.g2446	397	XP_027074609.1_transcription_factor_MYB16_[Coffea_arabica]	344	83129	326	0	528		CDP02253.1	389	78.465	404	0	605
jcf7180007713848.g2448	424	XP_027110218.1_calmodulin-binding_receptor-like_cytoplasmic_kinase_2_[Coffea_arabica]	476	63871	465	0	542		CDP09145.1	478	62.796	465	1.81e-178	511
jcf7180007713858.g2450	310	XP_027114374.1_uncharacterized_protein_LOC113732656_[Coffea_arabica]	308	78247	308	0	513		CDP06785.1	308	77.597	308	0	510
jcf7180007713863.g2452	513	XP_027085152.1_serine_carboxypeptidase-like_[Coffea_arabica]	498	73207	474	0	756		CDP07044.1	499	72.899	476	0	751
jcf7180007713865.g2453	420	XP_027123249.1_microtubule-associated_protein_70-1-like_[Coffea_arabica]	619	70925	454	0	607		CDP16283.1	627	66.366	443	0	530
jcf7180007713891.g2457	424	XP_027107321.1_DNA_gyrase_subunit_A,_chloroplastic/mitochondrial-like_[Coffea_arabica]	954	77093	454	0	700		CDP16534.1	937	77.093	454	0	701
jcf7180007713924.g2459	556	XP_027095803.1_TATA-binding_protein-associated_factor_BTAF1-like_isoform_X1_[Coffea_arabica]	2052	69891	548	0	701		CDP16963.1	2081	70.073	548	0	703
jcf7180007713937.g2462	790	XP_027084963.1_uncharacterized_protein_LOC113706994_isoform_X2_[Coffea_arabica]	1070	56416	865	0	882		CDP07029.1	1242	56.12	866	0	872
jcf7180007713986.g2475	1083	XP_027099446.1_putative_late_blight_resistance_protein_homolog_R1A-3_[Coffea_arabica]	1220	42326	1049	0	744		CDP05538.1	1220	42.161	1046	0	741
jcf7180007714017.g2479	904	XP_027064625.1_DExH-box_ATP-dependent_RNA_helicase_DExH6-like_isoform_X1_[Coffea_arabica]	1242	74917	905	0	1350		CDP17863.1	1241	75.138	905	0	1353
jcf7180007714017.g2480	454	XP_027063957.1_cyclin-T1-5-like_isoform_X2_[Coffea_arabica]	506	69397	464	0	578		CDP07479.1	449	56.081	148	7.62e-48	172
jcf7180007714021.g2481	365	XP_027112806.1_probable_DNA_helicase_MCM9_[Coffea_arabica]	660	88764	356	0	641		CDO97414.1	660	88.202	356	0	637
jcf7180007714022.g2482	303	XP_027067200.1_polypyrimidine_tract-binding_protein_homolog_3_isoform_X2_[Coffea_arabica]	417	88000	325	0	563		CDP17953.1	432	88	325	0	563
jcf7180007714022.g2483	563	XP_027066268.1_pyruvate_kinase,_cytosolic_isozyme-like_[Coffea_arabica]	540	78090	534	0	840		CDP17952.1	464	82.073	463	0	783
jcf7180007714022.g2484	527	XP_027066268.1_pyruvate_kinase,_cytosolic_isozyme-like_[Coffea_arabica]	540	82560	539	0	906		CDP17952.1	464	86.825	463	0	838
jcf7180007714028.g2485	669	XP_027061761.1_26S_proteasome_non-ATPase_regulatory_subunit_2_homolog_A-like_[Coffea_arabica]	896	91199	659	0	1207		CDP15869.1	591	89.877	326	0	601
jcf7180007714053.g2486	270	XP_027072612.1_enolase_[Coffea_arabica]	444	93333	270	0	513		CDP15353.1	444	93.333	270	0	513
jcf7180007714073.g2488	389	XP_027104400.1_probable_E3_ubiquitin-protein_ligase_RHC2A_[Coffea_arabica]	394	83503	394	0	591		CDP00121.1	392	83.418	392	0	587
jcf7180007714077.g2491	411	XP_027064792.1_sufE-like_protein_1,_chloroplastic/mitochondrial_[Coffea_arabica]	409	76584	363	0	545		CDP13667.1	409	76.309	363	0	541
jcf7180007714077.g2492	357	XP_027127687.1_fructose-bisphosphate_aldolase_5,_cytosolic_isoform_X1_[Coffea_arabica]	357	92157	357	0	673		CDP13668.1	357	92.157	357	0	674
jcf7180007714105.g2495	465	XP_027096560.1_transcription_factor_MYB124_[Coffea_arabica]	497	73020	404	0	592		CDP00301.1	497	73.02	404	0	592
jcf7180007714110.g2497	484	XP_027063437.1_glycerol-3-phosphate_acyltransferase_1-like_[Coffea_arabica]	559	78178	472	0	782		CDP06174.1	559	78.39	472	0	783
jcf7180007714178.g2512	845	XP_027078294.1_protein_CROWDED_NUCLEI_4-like_[Coffea_arabica]	909	67296	847	0	1027		CDP02647.1	910	66.942	847	0	1010
jcf7180007714193.g2514	384	XP_027119655.1_uncharacterized_protein_LOC113736759_[Coffea_arabica]	535	69091	385	0	543		CDP03466.1	507	68.312	385	0	525
jcf7180007714235.g2519	967	XP_027070263.1_uncharacterized_protein_LOC113695382_isoform_X1_[Coffea_arabica]	1478	55831	969	0	955		CDP14173.1	1487	55.728	969	0	947
jcf7180007714238.g2520	590	XP_027078428.1_transmembrane_protein_214-B-like_isoform_X1_[Coffea_arabica]	576	73142	592	0	813		CDP01620.1	716	79.526	464	0	746
jcf7180007714280.g2534	988	XP_027093847.1_putative_receptor-like_protein_kinase_At3g47110_[Coffea_arabica]	1009	68168	977	0	1349		CDP19861.1	865	44.737	988	0	758
jcf7180007714328.g2541	408	XP_027096345.1_pectate_lyase-like_[Coffea_arabica]	445	76225	408	0	650		CDP00293.1	445	76.225	408	0	650
jcf7180007714423.g2556	318	XP_027061874.1_histidine_kinase_2-like_isoform_X1_[Coffea_arabica]	1270	85220	318	0	550		CDP20622.1	1251	85.22	318	0	548
jcf7180007714428.g2557	1013	XP_027066369.1_uncharacterized_protein_LOC113692197_[Coffea_arabica]	1027	69694	1013	0	1410		CDP14089.1	2307	61.637	1014	0	1259
jcf7180007714440.g2560	349	XP_027108680.1_furcatin_hydrolase-like_[Coffea_arabica]	514	74063	347	0	556		CDP07703.1	514	74.063	347	0	557
jcf7180007714507.g2568	325	XP_027063213.1_transcription_termination_factor_MTERF6,_chloroplastic/mitochondrial_[Coffea_arabica]	331	83025	324	0	551		CDP18720.1	331	83.025	324	0	551
jcf7180007714534.g2573	780	XP_027074238.1_galactinol--sucrose_galactosyltransferase-like_[Coffea_arabica]	781	85147	781	0	1413		CDP02079.1	781	85.147	781	0	1413
jcf7180007714555.g2579	257	XP_027074960.1_serine_hydroxymethyltransferase,_mitochondrial-like_[Coffea_arabica]	517	97266	256	0	530		CDP19594.1	520	93.75	256	0	514
jcf7180007714565.g2580	413	XP_027096918.1_uncharacterized_protein_LOC113716714_isoform_X2_[Coffea_arabica]	1010	90274	401	0	741		CDP16866.1	1032	90.274	401	0	741
jcf7180007714603.g2582	345	XP_027062652.1_uncharacterized_protein_LOC113689018_[Coffea_arabica]	680	85276	326	0	526		CDP15895.1	470	85.538	325	0	526
jcf7180007714670.g2594	388	XP_027098277.1_lysine_histidine_transporter_2-like_[Coffea_arabica]	439	74084	382	0	588		CDP15024.1	440	71.466	382	0	588
jcf7180007714710.g2606	520	XP_027117475.1_pectinesterase_2-like_[Coffea_arabica]	523	82567	522	0	907		CDP20891.1	523	82.184	522	0	905
jcf7180007714716.g2607	586	XP_027075409.1_epidermal_growth_factor_receptor_substrate_15-like_1_[Coffea_arabica]	1200	60342	585	0	588		CDP01780.1	1200	60.513	585	0	591
jcf7180007714770.g2613	479	XP_027121102.1_probable_protein_phosphatase_2C_40_[Coffea_arabica]	510	74534	483	0	674		CDO98881.1	411	69.347	398	0	548
jcf7180007714776.g2614	398	XP_027088097.1_pentatricopeptide_repeat-containing_protein_At1g61870,_mitochondrial-like_[Coffea_arabica]	399	74937	399	0	634		CDP04379.1	399	74.687	399	0	632
jcf7180007714830.g2620	440	XP_027066634.1_LOW_QUALITY_PROTEIN:_DExH-box_ATP-dependent_RNA_helicase_DExH1_[Coffea_arabica]	939	76471	442	0	699		CDP10590.1	1057	72.747	466	0	687
jcf7180007714843.g2621	730	XP_027092867.1_uncharacterized_protein_LOC113713351_[Coffea_arabica]	731	78659	731	0	1088		CDP01138.1	748	77.005	748	0	1074
jcf7180007714894.g2625	429	XP_027113642.1_protein_EMSY-LIKE_3-like_[Coffea_arabica]	438	85142	424	0	684		CDP07691.1	438	85.377	424	0	687
jcf7180007714928.g2630	453	XP_027063875.1_uncharacterized_protein_LOC113690237_[Coffea_arabica]	535	58301	518	0	594		CDP14774.1	518	59.4	500	0	589
jcf7180007714933.g2631	744	XP_027117534.1_uncharacterized_protein_LOC113734951_isoform_X1_[Coffea_arabica]	748	76471	748	0	1098		CDO97816.1	521	62.185	119	4.39e-46	172
jcf7180007714936.g2632	534	XP_027084284.1_LOW_QUALITY_PROTEIN:_callose_synthase_3-like_[Coffea_arabica]	1946	91296	540	0	1017		CDP11070.1	1946	89.815	540	0	999
jcf7180007714974.g2635	440	XP_027105958.1_probable_receptor-like_protein_kinase_At1g49730_isoform_X1_[Coffea_arabica]	668	67840	426	0	581		CDO97187.1	668	67.84	426	0	581
jcf7180007714997.g2640	373	XP_027073335.1_tRNase_Z_TRZ2,_chloroplastic-like_isoform_X2_[Coffea_arabica]	371	80882	340	0	583		CDP04597.1	371	80.882	340	0	583
jcf7180007714999.g2641	549	XP_027091967.1_LOW_QUALITY_PROTEIN:_ubiquitin-like_domain-containing_protein_CIP73_[Coffea_arabica]	938	57143	560	0	555		CDP07318.1	936	56.714	566	2.85e-177	528
jcf7180007715098.g2653	691	XP_027087980.1_E3_UFM1-protein_ligase_1_homolog_[Coffea_arabica]	816	75419	716	0	1004		CDP08979.1	819	75.279	716	0	999
jcf7180007715189.g2659	292	XP_027074463.1_phosphatidylinositol_transfer_protein_3-like_[Coffea_arabica]	294	82313	294	0	515		CDP02024.1	294	81.973	294	0	512
jcf7180007715279.g2672	588	XP_027099904.1_uncharacterized_protein_LOC113719082_[Coffea_arabica]	849	71843	586	0	859		CDP00808.1	849	71.672	586	0	852
jcf7180007715293.g2673	545	XP_027087849.1_L-ascorbate_oxidase_homolog_[Coffea_arabica]	546	84587	545	0	943		CDP04415.1	546	84.404	545	0	937
jcf7180007715403.g2687	579	XP_027110086.1_phosphatidylinositol_4-kinase_gamma_3-like_[Coffea_arabica]	594	62203	590	0	744		CDP08673.1	579	78.238	579	0	950
jcf7180007715410.g2689	844	XP_027080620.1_serine/threonine-protein_kinase_MARK2-like_[Coffea_arabica]	939	66082	855	0	1088		CDP12123.1	938	65.263	855	0	1068
jcf7180007715430.g2692	482	XP_027103816.1_DNA_mismatch_repair_protein_MSH3-like_isoform_X2_[Coffea_arabica]	951	67015	479	0	648		CDP05214.1	1145	66.806	479	0	645
jcf7180007715455.g2693	487	XP_027115900.1_uncharacterized_protein_LOC113733882_isoform_X1_[Coffea_arabica]	652	72705	414	0	595		CDO98770.1	644	72.947	414	0	597
jcf7180007715455.g2694	482	XP_027115904.1_aldehyde_dehydrogenase_22A1_isoform_X1_[Coffea_arabica]	592	80300	533	0	882		CDO98771.1	592	80.3	533	0	882
jcf7180007715537.g2701	1102	XP_027074206.1_ubiquitin_carboxyl-terminal_hydrolase_26_[Coffea_arabica]	1094	73345	1118	0	1673		CDP12784.1	1094	73.435	1118	0	1674
jcf7180007715580.g2703	1153	XP_027126185.1_1-phosphatidylinositol-3-phosphate_5-kinase_FAB1B-like_isoform_X1_[Coffea_arabica]	1839	75847	1122	0	1684		CDO97796.1	1840	75.49	1122	0	1670
jcf7180007715605.g2705	1374	XP_027126020.1_ABC_transporter_G_family_member_35-like_[Coffea_arabica]	1457	79151	1367	0	2236		CDO97979.1	1499	86.861	1370	0	2399
jcf7180007715640.g2709	313	XP_027104485.1_UDP-glucuronic_acid_decarboxylase_6-like_isoform_X1_[Coffea_arabica]	399	96486	313	0	628		CDP00069.1	346	96.166	313	0	624
jcf7180007715662.g2711	530	XP_027063612.1_serine/threonine-protein_kinase_RHS3-like_isoform_X1_[Coffea_arabica]	571	73380	571	0	821		CDP19349.1	553	74.552	558	0	813
jcf7180007715663.g2712	331	XP_027115994.1_eukaryotic_translation_initiation_factor_2_subunit_gamma-like_[Coffea_arabica]	464	98187	331	0	661		CDO98851.1	464	98.187	331	0	661
jcf7180007715715.g2716	611	XP_027075560.1_SCARECROW-LIKE_protein_7-like_[Coffea_arabica]	632	73302	633	0	852		CDP02028.1	630	73.693	631	0	854
jcf7180007715815.g2725	369	XP_027073424.1_origin_of_replication_complex_subunit_1-like_isoform_X3_[Coffea_arabica]	769	78788	363	0	563		CDP18028.1	825	80.223	359	0	553
jcf7180007716157.g2741	440	XP_027079824.1_pentatricopeptide_repeat-containing_protein_At5g47360-like_[Coffea_arabica]	475	66437	435	0	619		CDP10009.1	475	65.057	435	0	601
jcf7180007716263.g2745	758	XP_027093450.1_MDIS1-interacting_receptor_like_kinase_2-like_[Coffea_arabica]	1044	59463	745	0	861		CDP11195.1	981	59.333	750	0	865
jcf7180007716334.g2748	371	XP_027118401.1_DNA_mismatch_repair_protein_MSH6-like_[Coffea_arabica]	1300	76839	367	0	555		CDP17077.1	1300	77.112	367	0	558
jcf7180007716344.g2749	940	XP_027063850.1_protein_MEI2-like_5_isoform_X2_[Coffea_arabica]	849	76432	908	0	1376		CDP06177.1	821	75.22	908	0	1342
jcf7180007716431.g2756	723	XP_027109317.1_LOW_QUALITY_PROTEIN:_scarecrow-like_protein_14_[Coffea_arabica]	748	67154	752	0	962		CDP09074.1	749	72.581	744	0	1041
jcf7180007716439.g2766	511	XP_027081900.1_3-ketoacyl-CoA_synthase_11-like_[Coffea_arabica]	511	90411	511	0	973		CDP04806.1	511	90.411	511	0	971
jcf7180007716441.g2767	783	XP_027100493.1_glutamate_receptor_3.2-like_isoform_X1_[Coffea_arabica]	901	72868	774	0	1154		CDP16877.1	901	73.127	774	0	1155
jcf7180007716443.g2771	1352	XP_027068980.1_coatomer_subunit_beta-1_[Coffea_arabica]	948	93369	935	0	1807		CDP10604.1	948	93.476	935	0	1809
jcf7180007716444.g2772	551	XP_027075597.1_scarecrow-like_protein_15_[Coffea_arabica]	554	73036	560	0	793		CDP02813.1	554	73.036	560	0	793
jcf7180007716445.g2773	516	XP_027080985.1_uncharacterized_protein_LOC113703723_[Coffea_arabica]	2220	62963	486	0	602		CDP18426.1	2220	62.91	488	0	600
jcf7180007716452.g2782	493	XP_027068481.1_E3_ubiquitin-protein_ligase_Hakai-like_[Coffea_arabica]	498	72892	498	0	706		CDP06525.1	498	72.892	498	0	706
jcf7180007716454.g2783	516	XP_027061614.1_beta-(1,2)-xylosyltransferase-like_[Coffea_arabica]	515	74330	522	0	793		CDP13758.1	310	80.968	310	0	535
jcf7180007716460.g2787	612	XP_027078562.1_serine/threonine_receptor-like_kinase_NFP_[Coffea_arabica]	610	67427	614	0	842		CDP02418.1	610	67.427	614	0	858
jcf7180007716462.g2789	426	XP_027086122.1_ATPase_family_AAA_domain-containing_protein_1-like_isoform_X1_[Coffea_arabica]	588	74941	427	0	617		CDP04451.1	588	74.941	427	0	617
jcf7180007716464.g2790	643	XP_027085815.1_E3_ubiquitin-protein_ligase_UPL5-like_isoform_X2_[Coffea_arabica]	837	58733	647	0	671		CDP04485.1	682	57.895	456	4.05e-164	490
jcf7180007716466.g2791	1399	XP_027113428.1_eukaryotic_translation_initiation_factor_4G_[Coffea_arabica]	1816	61911	1444	0	1590		CDP09395.1	882	52.244	557	3.11e-130	427
jcf7180007716471.g2794	551	XP_027117218.1_pentatricopeptide_repeat-containing_protein_At2g13600-like_isoform_X1_[Coffea_arabica]	834	72928	543	0	830		CDP14666.1	770	73.112	543	0	832
jcf7180007716481.g2801	849	XP_027108185.1_BEACH_domain-containing_protein_C2-like_isoform_X3_[Coffea_arabica]	1369	78970	699	0	982		CDP17801.1	2592	79.113	699	0	983
jcf7180007716485.g2803	333	XP_027089945.1_glycosyltransferase_family_protein_64_C3-like_isoform_X1_[Coffea_arabica]	336	70238	336	0	510		CDP10674.1	236	64.677	201	6.71e-91	275
jcf7180007716505.g2807	513	XP_027070014.1_zinc_finger_protein_JACKDAW-like_[Coffea_arabica]	554	58621	580	0	538		CDP06730.1	554	58.621	580	0	538
jcf7180007716511.g2809	362	XP_027077764.1_uncharacterized_protein_LOC113701354_[Coffea_arabica]	370	73278	363	0	546		CDP02583.1	340	66.667	357	1.33e-167	475
jcf7180007716515.g2811	350	XP_027082871.1_molybdate_transporter_1-like_isoform_X2_[Coffea_arabica]	421	81972	355	0	566		CDP18432.1	459	80.845	355	0	577
jcf7180007716531.g2816	855	XP_027101120.1_protein_argonaute_4-like_[Coffea_arabica]	919	66086	861	0	1123		CDP09667.1	868	66.312	846	0	1109
jcf7180007716534.g2817	414	XP_027077240.1_putative_U-box_domain-containing_protein_50_isoform_X2_[Coffea_arabica]	660	73430	414	0	616		CDP01572.1	802	73.188	414	0	616
jcf7180007716534.g2818	307	XP_027079076.1_nucleobase-ascorbate_transporter_11-like_[Coffea_arabica]	757	83987	306	0	543		CDP01571.1	759	83.007	306	0	537
jcf7180007716536.g2820	665	XP_027081868.1_synaptonemal_complex_protein_1-like_[Coffea_arabica]	721	59738	688	0	721		CDP11685.1	726	59.738	688	0	721
jcf7180007716539.g2822	645	XP_027077994.1_probable_acyl-activating_enzyme_1,_peroxisomal_[Coffea_arabica]	552	57030	505	0	553		CDP01816.1	552	56.634	505	0	548
jcf7180007716542.g2824	356	XP_027122687.1_plastidic_ATP/ADP-transporter-like_[Coffea_arabica]	631	87464	343	0	576		CDO98099.1	630	87.719	342	0	576
jcf7180007716545.g2825	377	XP_027111011.1_actin-like_[Coffea_arabica]	377	95225	377	0	758		CDP00088.1	377	95.225	377	0	758
jcf7180007716547.g2826	278	XP_027101966.1_glyceraldehyde-3-phosphate_dehydrogenase,_cytosolic_[Coffea_arabica]	337	90975	277	0	528		CDP16658.1	337	90.975	277	0	528
jcf7180007716557.g2831	544	XP_027123452.1_uncharacterized_protein_LOC113740143_[Coffea_arabica]	618	56781	553	0	565		CDO98485.1	677	57.116	541	0	559
jcf7180007716566.g2836	628	XP_027075410.1_pentatricopeptide_repeat-containing_protein_At2g17525,_mitochondrial-like_[Coffea_arabica]	648	70032	624	0	907		CDP01779.1	648	70.032	624	0	907
jcf7180007716568.g2837	378	XP_027091610.1_KH_domain-containing_protein_HEN4-like_[Coffea_arabica]	696	80357	392	0	585		CDP00980.1	697	80.357	392	0	585
jcf7180007716586.g2843	972	XP_027089141.1_leucine-rich_repeat_receptor-like_serine/threonine-protein_kinase_BAM3_[Coffea_arabica]	988	77017	979	0	1509		CDP04113.1	987	76.633	980	0	1506
jcf7180007716588.g2844	362	XP_027078830.1_protein_COBRA-like_[Coffea_arabica]	454	87603	363	0	679		CDP21681.1	454	86.777	363	0	671
jcf7180007716588.g2845	384	XP_027078833.1_COBRA-like_protein_4_isoform_X2_[Coffea_arabica]	433	89529	382	0	731		CDP21871.1	398	89.529	382	0	729
jcf7180007716628.g2861	406	XP_027079583.1_3-oxoacyl-[acyl-carrier-protein]_synthase_I,_chloroplastic-like_[Coffea_arabica]	490	96059	406	0	788		CDP12182.1	490	96.059	406	0	788
jcf7180007716632.g2862	368	XP_027109852.1_ATPase_family_AAA_domain-containing_protein_3-B-like_[Coffea_arabica]	638	90608	362	0	690		CDP04933.1	294	89.116	294	0	547
jcf7180007716634.g2863	384	XP_027066792.1_xylose_isomerase-like_[Coffea_arabica]	478	85635	362	0	665		CDP02939.1	478	85.635	362	0	665
jcf7180007716662.g2877	451	XP_027113175.1_uncharacterized_protein_LOC113731879_[Coffea_arabica]	1177	77652	443	0	703		CDO97570.1	1177	78.104	443	0	707
jcf7180007716673.g2882	376	XP_027074949.1_NADPH-dependent_diflavin_oxidoreductase_1-like_isoform_X5_[Coffea_arabica]	459	66817	443	0	573		CDP02783.1	628	69.014	426	0	568
jcf7180007716696.g2887	473	XP_027080015.1_endoglucanase_6-like_[Coffea_arabica]	618	56745	467	0	537		CDP14001.1	416	58.562	473	0	548
jcf7180007716713.g2894	503	XP_027080124.1_protein_SPA1-RELATED_2-like_isoform_X1_[Coffea_arabica]	1061	68701	508	0	690		CDP12124.1	1042	67.573	515	0	684
jcf7180007716724.g2896	335	XP_027067419.1_senescence-specific_cysteine_protease_SAG39-like_[Coffea_arabica]	336	77745	337	0	544		CDP18644.1	336	76.786	336	0	542
jcf7180007716724.g2897	829	XP_027068759.1_probable_galactinol--sucrose_galactosyltransferase_2_[Coffea_arabica]	770	85443	790	0	1369		CDP18648.1	770	85.443	790	0	1369
jcf7180007716751.g2902	345	XP_027107661.1_mevalonate_kinase-like_[Coffea_arabica]	387	83965	343	0	554		CDP20121.1	387	83.965	343	0	554
jcf7180007716754.g2904	366	XP_027090298.1_asparagine_synthetase_[glutamine-hydrolyzing]_[Coffea_arabica]	589	91008	367	0	696		CDP09210.1	606	91.281	367	0	696
jcf7180007716755.g2906	456	XP_027075096.1_uncharacterized_protein_LOC113699154_isoform_X1_[Coffea_arabica]	494	83732	418	0	694		CDP02803.1	494	83.732	418	0	694
jcf7180007716757.g2907	803	XP_027066934.1_protein_PHOX4-like_[Coffea_arabica]	736	67662	804	0	1062		CDP10491.1	659	75.833	480	0	772
jcf7180007716764.g2908	317	XP_027092689.1_dipeptidyl-peptidase_5-like_[Coffea_arabica]	734	83882	304	0	528		CDP07619.1	675	83.882	304	0	528
jcf7180007716778.g2914	620	XP_027110744.1_probable_methyltransferase_PMT23_[Coffea_arabica]	588	72696	575	0	867		CDP13980.1	588	72.696	575	0	867
jcf7180007716798.g2921	452	XP_027077629.1_IST1-like_protein_isoform_X1_[Coffea_arabica]	477	64718	496	0	538		CDP01823.1	479	64.458	498	0	518
jcf7180007716817.g2922	498	XP_027101972.1_LOW_QUALITY_PROTEIN:_AUGMIN_subunit_6_[Coffea_arabica]	732	70459	545	0	705		CDP16652.1	727	71.587	542	0	716
jcf7180007716828.g2926	361	XP_027082002.1_phosphomevalonate_kinase,_peroxisomal-like_isoform_X1_[Coffea_arabica]	500	83844	359	0	615		CDP11707.1	487	83.565	359	0	615
jcf7180007716881.g2951	991	XP_027118181.1_putative_calcium-transporting_ATPase_13,_plasma_membrane-type_[Coffea_arabica]	1006	48816	971	0	855		CDP20630.1	827	49.576	825	0	743
jcf7180007716883.g2952	556	XP_027091033.1_protein_TIC110,_chloroplastic-like_[Coffea_arabica]	1023	84229	558	0	945		CDP04069.1	1023	83.692	558	0	942
jcf7180007716923.g2962	778	XP_027085196.1_LOW_QUALITY_PROTEIN:_protein_TPR2-like_[Coffea_arabica]	1136	86176	774	0	1402		CDP11737.1	736	80.662	755	0	1245
jcf7180007716926.g2963	550	XP_027125921.1_DExH-box_ATP-dependent_RNA_helicase_DExH3_isoform_X1_[Coffea_arabica]	1202	85900	539	0	942		CDO98393.1	1212	85.714	539	0	936
jcf7180007716975.g2980	841	XP_027092028.1_SWI/SNF_complex_subunit_SWI3C-like_[Coffea_arabica]	792	71294	850	0	1107		CDP10951.1	791	70.505	851	0	1090
jcf7180007716996.g2985	380	XP_027068344.1_protein_phosphatase_2C_50-like_[Coffea_arabica]	538	73421	380	0	579		CDP03129.1	538	73.684	380	0	581
jcf7180007717012.g2986	628	XP_027097201.1_LOW_QUALITY_PROTEIN:_BTB/POZ_domain-containing_protein_At1g67900-like_[Coffea_arabica]	626	88038	627	0	1118		CDP13229.1	626	88.517	627	0	1125
jcf7180007717041.g2994	321	XP_027111224.1_ubiquitin_carboxyl-terminal_hydrolase_12-like_isoform_X1_[Coffea_arabica]	1116	95760	283	0	561		CDO99956.1	1115	95.76	283	0	559
jcf7180007717066.g3002	401	XP_027124759.1_CBL-interacting_serine/threonine-protein_kinase_5-like_[Coffea_arabica]	455	72848	453	0	669		CDO98225.1	448	72.16	449	0	656
jcf7180007717122.g3016	616	XP_027104530.1_ABC_transporter_B_family_member_6-like_[Coffea_arabica]	1399	90538	613	0	1129		CDP00038.1	1318	90.538	613	0	1128
jcf7180007717153.g3020	988	XP_027083747.1_putative_receptor-like_protein_kinase_At3g47110_[Coffea_arabica]	1057	49815	813	0	706		CDP18494.1	1062	48.824	850	0	706
jcf7180007717171.g3023	667	XP_027100039.1_probable_glucan_1,3-alpha-glucosidase_[Coffea_arabica]	934	82963	675	0	1191		CDP05480.1	913	80.296	675	0	1141
jcf7180007717177.g3025	376	XP_027097193.1_probable_inactive_purple_acid_phosphatase_1_isoform_X2_[Coffea_arabica]	582	80053	376	0	644		CDP00432.1	611	72.236	407	0	629
jcf7180007717180.g3026	378	XP_027095294.1_uncharacterized_protein_LOC113715239_isoform_X2_[Coffea_arabica]	491	69409	389	0	534		CDP03726.1	559	68.638	389	0	527
jcf7180007717244.g3045	645	XP_027095290.1_1-aminocyclopropane-1-carboxylate_oxidase_homolog_1-like_[Coffea_arabica]	380	69565	368	0	541		CDP03727.1	380	69.293	368	0	537
jcf7180007717244.g3046	562	XP_027114678.1_transcription_factor_bHLH155-like_isoform_X3_[Coffea_arabica]	712	57895	589	0	586		CDP03728.1	762	57.801	564	0	560
jcf7180007717265.g3053	286	XP_027106752.1_serine/threonine-protein_kinase_BSK2-like_[Coffea_arabica]	492	95817	263	0	519		CDP09344.1	492	95.817	263	0	519
jcf7180007717291.g3057	675	XP_027120844.1_LOW_QUALITY_PROTEIN:_primary_amine_oxidase-like_[Coffea_arabica]	700	67012	676	0	949		CDO99048.1	700	67.259	675	0	956
jcf7180007717309.g3064	713	XP_027074560.1_putative_pentatricopeptide_repeat-containing_protein_At3g47840_[Coffea_arabica]	711	71208	712	0	1062		CDP01988.1	711	71.208	712	0	1060
jcf7180007717351.g3074	430	XP_027107831.1_ATP-dependent_DNA_helicase_2_subunit_KU80-like_isoform_X1_[Coffea_arabica]	690	82005	389	0	669		CDP17773.1	690	82.005	389	0	667
jcf7180007717360.g3078	426	XP_027083000.1_regulator_of_nonsense_transcripts_1_homolog_[Coffea_arabica]	1281	88209	441	0	793		CDP13413.1	1281	88.209	441	0	793
jcf7180007717379.g3082	369	XP_027112929.1_dnaJ_protein_homolog_2-like_[Coffea_arabica]	416	78804	368	0	595		CDP09461.1	416	78.533	368	0	592
jcf7180007717389.g3083	1097	XP_027089087.1_probable_ubiquitin-conjugating_enzyme_E2_23_[Coffea_arabica]	1138	72719	1140	0	1601		CDP19572.1	1138	72.105	1140	0	1591
jcf7180007717405.g3086	461	XP_027115766.1_UDP-glycosyltransferase_75C1-like_[Coffea_arabica]	463	62907	461	0	610		CDP20005.1	463	62.907	461	0	611
jcf7180007717415.g3089	955	XP_027093254.1_glutamate_receptor_2.7-like_[Coffea_arabica]	897	63075	891	0	1139		CDP01367.1	1466	60.687	931	0	1143
jcf7180007717418.g3090	406	XP_027094117.1_putative_transcription_elongation_factor_SPT5_homolog_1_isoform_X2_[Coffea_arabica]	857	79137	417	0	663		CDP12009.1	1035	78.52	419	0	660
jcf7180007717444.g3093	288	XP_027097034.1_probable_LRR_receptor-like_serine/threonine-protein_kinase_At1g67720_isoform_X3_[Coffea_arabica]	929	90034	291	0	540		CDP13280.1	929	90.034	291	0	540
jcf7180007717457.g3094	560	XP_027118543.1_uncharacterized_protein_LOC113735751_[Coffea_arabica]	547	67736	561	0	656		CDP17062.1	547	67.736	561	0	656
jcf7180007717459.g3095	483	XP_027061884.1_condensin_complex_subunit_2-like_isoform_X2_[Coffea_arabica]	645	63017	484	0	573		CDP16232.1	692	57.197	528	0	540
jcf7180007717462.g3096	731	XP_027111643.1_uncharacterized_protein_LOC113730877_[Coffea_arabica]	594	63110	553	0	663		CDP16262.1	719	61.199	567	0	654
jcf7180007717484.g3098	544	XP_027126302.1_LOW_QUALITY_PROTEIN:_midasin-like_[Coffea_arabica]	5382	66129	496	0	662		CDO97871.1	5476	65.524	496	0	655
jcf7180007717495.g3099	457	XP_027120017.1_UDP-glycosyltransferase_74F2-like_[Coffea_arabica]	455	69231	455	0	678		CDP03995.1	459	54.751	442	2.39e-179	513
jcf7180007717520.g3105	572	XP_027072700.1_mediator_of_RNA_polymerase_II_transcription_subunit_13-like_isoform_X3_[Coffea_arabica]	1947	87086	573	0	1002		CDP18600.1	1961	87.26	573	0	1004
jcf7180007717556.g3108	338	XP_027086534.1_2-methylacyl-CoA_dehydrogenase,_mitochondrial-like_[Coffea_arabica]	405	80473	338	0	541		CDP07142.1	405	79.882	338	0	537
jcf7180007717556.g3109	837	XP_027086520.1_auxin_response_factor_4-like_isoform_X2_[Coffea_arabica]	835	75060	838	0	1248		CDP07141.1	831	74.493	839	0	1232
jcf7180007717613.g3128	678	XP_027093106.1_probable_inactive_receptor_kinase_At5g67200_[Coffea_arabica]	671	72643	647	0	942		CDP01297.1	788	73.416	647	0	939
jcf7180007717641.g3132	1018	XP_027127507.1_probable_LRR_receptor-like_serine/threonine-protein_kinase_At3g47570_[Coffea_arabica]	1056	58925	1042	0	1127		CDP21284.1	1027	57.869	1042	0	1090
jcf7180007717707.g3144	768	XP_027121211.1_protein_FAR1-RELATED_SEQUENCE_7-like_[Coffea_arabica]	768	84505	768	0	1396		CDP17146.1	610	26.305	479	7.12e-24	106
jcf7180007717710.g3145	598	XP_027113324.1_squamous_cell_carcinoma_antigen_recognized_by_T-cells_3_[Coffea_arabica]	863	65474	643	0	806		CDO97665.1	856	65.566	636	0	804
jcf7180007717723.g3147	833	XP_027119897.1_uncharacterized_protein_LOC113736896_[Coffea_arabica]	879	75201	871	0	1301		CDO98943.1	881	74.685	873	0	1293
jcf7180007717730.g3149	443	XP_027098685.1_beta-glucosidase_11-like_isoform_X2_[Coffea_arabica]	526	67120	441	0	642		CDP20841.1	501	66.44	441	0	636
jcf7180007717750.g3156	697	XP_027071455.1_BTB/POZ_domain-containing_protein_FBL11-like_isoform_X3_[Coffea_arabica]	905	61146	628	0	733		CDP15382.1	901	60.669	628	0	726
jcf7180007717775.g3163	510	XP_027064170.1_kinesin-like_protein_KIN-14Q_[Coffea_arabica]	364	74247	365	0	533		CDP06121.1	1159	77.843	510	0	789
jcf7180007717812.g3175	610	XP_027084275.1_20S-pre-rRNA_D-site_endonuclease_nob1-like_isoform_X1_[Coffea_arabica]	630	66667	594	0	723		CDP09760.1	629	66.837	588	0	716
jcf7180007717820.g3178	497	XP_027117052.1_DNA_topoisomerase_3-beta_isoform_X1_[Coffea_arabica]	861	79845	516	0	836		CDP10274.1	808	80.046	436	0	736
jcf7180007717821.g3179	832	XP_027116948.1_spermatogenesis-associated_protein_20-like_isoform_X1_[Coffea_arabica]	862	74402	836	0	1224		CDP03531.1	822	76.683	802	0	1219
jcf7180007717855.g3184	1027	XP_027078608.1_histone-lysine_N-methyltransferase_SUVR5_isoform_X4_[Coffea_arabica]	1476	71969	1031	0	1538
jcf7180007717881.g3189	398	XP_027115861.1_protein_REDUCED_WALL_ACETYLATION_2-like_[Coffea_arabica]	544	77468	395	0	619		CDO98736.1	544	77.468	395	0	619
jcf7180007717881.g3191	682	XP_027078789.1_pentatricopeptide_repeat-containing_protein_At3g48810-like_isoform_X1_[Coffea_arabica]	677	68000	650	0	935		CDP09291.1	675	68.462	650	0	938
jcf7180007717976.g3220	678	XP_027108378.1_ATP-dependent_helicase_BRM_isoform_X2_[Coffea_arabica]	1933	79712	695	0	1114		CDP08793.1	2223	79.798	693	0	1112
jcf7180007718012.g3227	386	XP_027074820.1_sulfite_exporter_TauE/SafE_family_protein_3-like_[Coffea_arabica]	479	76839	367	0	546		CDP02034.1	479	76.567	367	0	544
jcf7180007718019.g3228	470	XP_027123135.1_LOW_QUALITY_PROTEIN:_O-fucosyltransferase_36-like_[Coffea_arabica]	531	76359	423	0	657		CDO97781.1	479	78.542	480	0	771
jcf7180007718023.g3229	758	XP_027077881.1_protein_FAR1-RELATED_SEQUENCE_5-like_isoform_X2_[Coffea_arabica]	800	72160	801	0	1150		CDP17140.1	293	57.143	112	8.2e-31	124
jcf7180007718083.g3235	1015	XP_027071626.1_receptor-like_protein_34_[Coffea_arabica]	1063	59114	971	0	1031		CDP18311.1	1140	52.43	967	0	895
jcf7180007718096.g3237	755	XP_027099431.1_ankyrin-2-like_[Coffea_arabica]	759	77358	742	0	1178		CDP13319.1	759	76.954	742	0	1170
jcf7180007718106.g3240	407	XP_027070785.1_adenine_nucleotide_transporter_BT1,_chloroplastic/mitochondrial-like_[Coffea_arabica]	404	78765	405	0	620		CDP10392.1	404	78.765	405	0	620
jcf7180007718128.g3243	646	XP_027078876.1_dnaJ_homolog_subfamily_C_member_2-like_[Coffea_arabica]	650	78495	651	0	991		CDP01839.1	650	78.187	651	0	986
jcf7180007718132.g3245	737	XP_027091976.1_WD_repeat-containing_protein_PCN-like_[Coffea_arabica]	807	72764	738	0	1040		CDP01270.1	807	72.629	738	0	1038
jcf7180007718159.g3250	533	XP_027108368.1_origin_of_replication_complex_subunit_5-like_[Coffea_arabica]	535	70632	538	0	763		CDP08798.1	535	71.19	538	0	765
jcf7180007718225.g3253	584	XP_027079923.1_AT-rich_interactive_domain-containing_protein_2-like_[Coffea_arabica]	686	57530	591	0	659		CDP12045.1	686	57.699	591	0	664
jcf7180007718241.g3256	699	XP_027112196.1_protein_CHROMATIN_REMODELING_35_isoform_X2_[Coffea_arabica]	906	84732	596	0	1073		CDO97016.1	906	84.564	596	0	1071
jcf7180007718254.g3258	854	XP_027079011.1_uncharacterized_protein_LOC113702174_isoform_X1_[Coffea_arabica]	3218	48529	816	0	723		CDP12869.1	3262	48.529	816	0	719
jcf7180007718259.g3261	402	XP_027110742.1_protein_MID1-COMPLEMENTING_ACTIVITY_1-like_isoform_X2_[Coffea_arabica]	378	79781	366	0	576		CDP13977.1	378	80.055	366	0	578
jcf7180007718276.g3266	499	XP_027075684.1_glucan_endo-1,3-beta-glucosidase_4-like_isoform_X2_[Coffea_arabica]	523	80924	498	0	829		CDP16794.1	503	80.321	498	0	810
jcf7180007718288.g3268	328	XP_027092492.1_monocopper_oxidase-like_protein_SKU5_isoform_X1_[Coffea_arabica]	600	88991	327	0	610		CDP03969.1	600	88.685	327	0	607
jcf7180007718316.g3272	825	XP_027122396.1_putative_pentatricopeptide_repeat-containing_protein_At5g08490_[Coffea_arabica]	853	65949	743	0	1045		CDP12411.1	853	65.545	743	0	1036
jcf7180007718365.g3277	477	XP_027071114.1_ATP-dependent_zinc_metalloprotease_FTSH_10,_mitochondrial-like_isoform_X1_[Coffea_arabica]	823	92678	478	0	909		CDP06599.1	823	92.259	478	0	904
jcf7180007718390.g3281	381	XP_027073116.1_aspartyl_protease_family_protein_1-like_isoform_X1_[Coffea_arabica]	523	73521	355	0	543		CDP01850.1	517	73.639	349	0	536
jcf7180007718442.g3295	625	XP_027111356.1_pleiotropic_drug_resistance_protein_2-like_[Coffea_arabica]	1478	89655	580	0	1088		CDO99882.1	1478	89.81	579	0	1085
jcf7180007718466.g3298	588	XP_027098310.1_ribulose-1,5_bisphosphate_carboxylase/oxygenase_large_subunit_N-methyltransferase,_chloroplastic-like_[Coffea_arabica]	490	73084	535	0	796		CDP00367.1	530	73.084	535	0	793
jcf7180007718469.g3301	926	XP_027117415.1_probable_RNA_helicase_SDE3_isoform_X2_[Coffea_arabica]	919	69570	930	0	1306		CDO99085.1	919	69.57	930	0	1306
jcf7180007718539.g3311	668	XP_027084481.1_putative_phospholipid:diacylglycerol_acyltransferase_2_[Coffea_arabica]	681	73016	693	0	987		CDP06999.1	667	70.977	696	0	953
jcf7180007718598.g3318	436	XP_027115797.1_APO_protein_1,_chloroplastic-like_isoform_X1_[Coffea_arabica]	455	73128	454	0	660		CDO98690.1	453	72.467	454	0	647
jcf7180007718604.g3319	680	XP_027075587.1_subtilisin-like_protease_SBT3.9_[Coffea_arabica]	763	80711	394	0	639		CDP01740.1	763	80.711	394	0	639
jcf7180007718710.g3330	487	XP_027075084.1_UPF0496_protein_1-like_[Coffea_arabica]	411	69383	405	0	533		CDP02406.1	311	73.443	305	3.33e-149	432
jcf7180007718717.g3331	692	XP_027095592.1_putative_late_blight_resistance_protein_homolog_R1B-17_[Coffea_arabica]	1491	59104	692	0	839		CDP20153.1	1449	58.551	690	0	816
jcf7180007718729.g3335	391	XP_027071160.1_rop_guanine_nucleotide_exchange_factor_7-like_[Coffea_arabica]	686	80556	360	0	586		CDP06554.1	686	80.833	360	0	587
jcf7180007718802.g3343	695	XP_027064230.1_putative_aconitate_hydratase,_cytoplasmic_[Coffea_arabica]	1009	93629	361	0	702		CDP05740.1	1009	93.629	361	0	702
jcf7180007718828.g3349	339	XP_027100611.1_U5_small_nuclear_ribonucleoprotein_40_kDa_protein-like_[Coffea_arabica]	337	92582	337	0	660		CDP11024.1	337	93.175	337	0	664
jcf7180007718862.g3361	596	XP_027087347.1_G-type_lectin_S-receptor-like_serine/threonine-protein_kinase_At1g11300_isoform_X1_[Coffea_arabica]	848	60276	579	0	687		CDP04302.1	826	59.5	600	0	684
jcf7180007718885.g3365	659	XP_027104750.1_uncharacterized_protein_LOC113725658_isoform_X1_[Coffea_arabica]	1292	67982	659	0	809		CDO99910.1	1192	67.982	659	0	811
jcf7180007718913.g3373	652	XP_027076744.1_uncharacterized_protein_LOC113700471_[Coffea_arabica]	1147	47686	713	0	599		CDP01405.1	934	47.405	713	0	595
jcf7180007719015.g3382	600	XP_027119689.1_protein_FLX-like_2_[Coffea_arabica]	457	63948	466	0	538		CDP03442.1	457	63.734	466	0	537
jcf7180007719032.g3384	400	XP_027088456.1_probable_serine/threonine-protein_kinase_PBL9_isoform_X1_[Coffea_arabica]	406	85897	390	0	687		CDP09060.1	406	84.872	390	0	681
jcf7180007719046.g3386	643	XP_027097871.1_phosphatidylinositol_4-kinase_gamma_7-like_isoform_X1_[Coffea_arabica]	641	84914	643	0	1094		CDP00486.1	641	84.914	643	0	1096
jcf7180007719050.g3387	371	XP_027112635.1_uncharacterized_protein_LOC113731526_[Coffea_arabica]	373	85908	369	0	665		CDO97279.1	373	85.908	369	0	667
jcf7180007719122.g3399	1269	XP_027076456.1_auxilin-like_protein_1_isoform_X1_[Coffea_arabica]	1419	46072	1311	0	880		CDP01994.1	1419	46.224	1311	0	889
jcf7180007719129.g3400	420	XP_027067215.1_fe-S_cluster_assembly_factor_HCF101,_chloroplastic-like_isoform_X1_[Coffea_arabica]	523	89514	391	0	736		CDP03365.1	523	89.514	391	0	736
jcf7180007719205.g3405	389	XP_027092447.1_SKP1-interacting_partner_15_[Coffea_arabica]	379	78663	389	0	591		CDP11371.1	379	78.406	389	0	588
jcf7180007719211.g3407	325	XP_027105231.1_LOW_QUALITY_PROTEIN:_T-complex_protein_1_subunit_beta-like_[Coffea_arabica]	527	94921	315	0	613		CDP15566.1	640	94.603	315	0	612
jcf7180007719215.g3409	589	XP_027064871.1_WEB_family_protein_At5g55860-like_[Coffea_arabica]	659	75482	571	0	770		CDP13701.1	653	75.306	571	0	769
jcf7180007719306.g3418	422	XP_027106475.1_protein_GRAVITROPIC_IN_THE_LIGHT_1-like_[Coffea_arabica]	422	86967	422	0	783		CDO97711.1	399	87.218	399	0	741
jcf7180007719311.g3420	484	XP_027076792.1_soyasapogenol_B_glucuronide_galactosyltransferase-like_[Coffea_arabica]	486	62241	482	0	639		CDP01301.1	486	60.206	485	0	626
jcf7180007719312.g3421	745	XP_027100421.1_protein_OBERON_3-like_[Coffea_arabica]	848	75857	642	0	940		CDP05496.1	779	75.5	600	0	877
jcf7180007719316.g3422	416	XP_027120141.1_uncharacterized_protein_LOC113737090_[Coffea_arabica]	429	71770	418	0	628		CDO99312.1	421	71.292	418	0	627
jcf7180007719324.g3428	588	XP_027085095.1_protein_NUCLEAR_FUSION_DEFECTIVE_4-like_[Coffea_arabica]	590	80107	563	0	923		CDP07039.1	593	80.319	564	0	925
jcf7180007719348.g3433	751	XP_027067000.1_leucine-rich_repeat_receptor-like_protein_kinase_TDR_[Coffea_arabica]	951	72468	770	0	1125		CDP10523.1	933	70.39	770	0	1082
jcf7180007719369.g3438	552	XP_027118979.1_uncharacterized_protein_LOC113736284_[Coffea_arabica]	653	86861	548	0	978		CDO99416.1	635	83.759	548	0	937
jcf7180007719418.g3450	657	XP_027078702.1_L-type_lectin-domain_containing_receptor_kinase_IX.1-like_[Coffea_arabica]	732	72698	630	0	953		CDP02693.1	628	69.829	643	0	916
jcf7180007719458.g3452	489	XP_027099794.1_sterol_14-demethylase-like_[Coffea_arabica]	491	88589	482	0	862		CDP18992.1	486	89.004	482	0	864
jcf7180007719475.g3453	1005	XP_027105302.1_protein_SMG7L-like_[Coffea_arabica]	996	60813	1008	0	1200		CDO99524.1	996	60.714	1008	0	1197
jcf7180007719510.g3458	347	XP_027084762.1_3-ketoacyl-CoA_synthase_10_[Coffea_arabica]	531	90202	347	0	667		CDP17887.1	531	89.914	347	0	666
jcf7180007719513.g3460	547	XP_027125741.1_nodulation-signaling_pathway_1_protein-like_[Coffea_arabica]	569	77798	554	0	866		CDO97852.1	544	77.477	555	0	861
jcf7180007719548.g3463	587	XP_027090656.1_LOW_QUALITY_PROTEIN:_mechanosensitive_ion_channel_protein_8-like_[Coffea_arabica]	767	81505	465	0	754		CDP07335.1	893	75.503	596	0	854
jcf7180007719618.g3470	504	XP_027116506.1_uncharacterized_protein_LOC113734273_[Coffea_arabica]	664	64496	476	0	585		CDO99223.1	664	64.076	476	0	582
jcf7180007719679.g3474	320	XP_027119668.1_COMPASS-like_H3K4_histone_methylase_component_WDR5B_[Coffea_arabica]	318	87748	302	0	562		CDP02663.1	314	61.111	306	7.05e-143	409
jcf7180007719683.g3477	850	XP_027073980.1_probable_ubiquitin_conjugation_factor_E4_[Coffea_arabica]	1031	81759	921	0	1497		CDP02278.1	1031	81.868	921	0	1500
jcf7180007719743.g3484	791	XP_027094457.1_uncharacterized_protein_LOC113714645_[Coffea_arabica]	831	64562	776	0	1060		CDP14089.1	2307	79.747	790	0	1321
jcf7180007719761.g3486	972	XP_027099480.1_putative_late_blight_resistance_protein_homolog_R1A-3_[Coffea_arabica]	1225	39097	1041	0	627		CDP05538.1	1220	37.189	1046	0	627
jcf7180007719801.g3491	599	XP_027096837.1_probable_AMP_deaminase_isoform_X1_[Coffea_arabica]	891	79695	591	0	993		CDP00273.1	891	79.865	591	0	994
jcf7180007719822.g3494	374	XP_027100233.1_uncharacterized_protein_LOC113719261_isoform_X1_[Coffea_arabica]	367	80165	363	0	516		CDP18102.1	367	80.165	363	0	516
jcf7180007719831.g3499	488	XP_027088675.1_abscisic_acid_8'-hydroxylase_2-like_[Coffea_arabica]	447	83218	435	0	754		CDP09084.1	434	83.333	432	0	749
jcf7180007719949.g3509	380	XP_027070104.1_WAT1-related_protein_At2g37460-like_[Coffea_arabica]	385	70942	382	0	547		CDP06652.1	339	71.386	339	5.76e-172	487
jcf7180007719962.g3511	680	XP_027094700.1_RNA-binding_KH_domain-containing_protein_RCF3-like_[Coffea_arabica]	665	74128	688	0	973		CDP14085.1	646	72.926	687	0	960
jcf7180007719973.g3512	449	XP_027122903.1_beta-amyrin_28-monooxygenase-like_isoform_X1_[Coffea_arabica]	500	76889	450	0	710		CDO98601.1	480	79.905	423	0	696
jcf7180007720125.g3524	673	XP_027115908.1_mediator_of_RNA_polymerase_II_transcription_subunit_33A-like_isoform_X1_[Coffea_arabica]	1336	79331	658	0	1071		CDP03599.1	1335	79.027	658	0	1069
jcf7180007720218.g3534	871	XP_027103539.1_importin_subunit_beta-1-like_[Coffea_arabica]	871	94604	871	0	1718		CDP05039.1	943	94.834	871	0	1719
jcf7180007720267.g3544	361	XP_027082649.1_uncharacterized_protein_LOC113704981_[Coffea_arabica]	362	78453	362	0	572		CDP15563.1	362	78.729	362	0	572
jcf7180007720285.g3545	1313	XP_027123792.1_ABC_transporter_C_family_member_3-like_[Coffea_arabica]	1522	81901	1315	0	2241		CDP14885.1	1480	81.673	1315	0	2233
jcf7180007720384.g3560	468	XP_027094000.1_glucan_endo-1,3-beta-D-glucosidase-like_[Coffea_arabica]	466	81720	465	0	799		CDP07525.1	467	81.505	465	0	799
jcf7180007720401.g3563	702	XP_027092192.1_BTB/POZ_domain-containing_protein_At2g30600_[Coffea_arabica]	802	69278	651	0	902		CDP07293.1	802	69.278	651	0	900
jcf7180007720437.g3566	417	XP_027097225.1_DNA_replication_licensing_factor_MCM2-like_[Coffea_arabica]	969	91748	412	0	780		CDP19000.1	969	91.748	412	0	780
jcf7180007720450.g3567	530	XP_027093369.1_squalene_epoxidase_3-like_[Coffea_arabica]	540	72894	546	0	782		CDP01371.1	540	72.161	546	0	772
jcf7180007720464.g3569	601	XP_027064176.1_uncharacterized_protein_LOC113690464_[Coffea_arabica]	602	74007	604	0	909		CDP06016.1	602	74.172	604	0	912
jcf7180007720513.g3574	970	XP_027104118.1_uncharacterized_protein_LOC113725257_isoform_X2_[Coffea_arabica]	1175	44569	893	0	631		CDP13888.1	1081	43.225	893	0	607
jcf7180007720573.g3587	364	XP_027074078.1_probable_galacturonosyltransferase-like_1_[Coffea_arabica]	352	86486	333	0	601		CDP02412.1	283	92.226	283	0	554
jcf7180007720621.g3590	578	XP_027118901.1_uncharacterized_protein_LOC113736225_isoform_X2_[Coffea_arabica]	819	68103	580	0	760		CDO99315.1	819	67.414	580	0	755
jcf7180007720623.g3591	649	XP_027115873.1_flowering_time_control_protein_FCA-like_isoform_X3_[Coffea_arabica]	809	59474	570	0	546		CDO98746.1	857	59.37	571	0	548
jcf7180007720627.g3592	444	XP_027094315.1_glucose-6-phosphate_isomerase_1,_chloroplastic-like_[Coffea_arabica]	625	94761	439	0	868		CDP11483.1	479	94.761	439	0	867
jcf7180007720656.g3593	648	XP_027084373.1_subtilisin-like_protease_SBT1.4_[Coffea_arabica]	758	67701	548	0	749		CDP11959.1	747	65.201	546	0	729
jcf7180007720710.g3596	700	XP_027109778.1_cucumisin-like_[Coffea_arabica]	701	73400	703	0	1068		CDP00153.1	699	73.609	701	0	1073
jcf7180007720801.g3605	306	XP_027064311.1_EH_domain-containing_protein_1_isoform_X2_[Coffea_arabica]	545	87541	305	0	570		CDP13787.1	545	87.541	305	0	570
jcf7180007721000.g3627	369	XP_027085466.1_probable_folate-biopterin_transporter_2_isoform_X2_[Coffea_arabica]	380	80707	368	0	586		CDP07891.1	496	80.435	368	0	585
jcf7180007721034.g3629	458	XP_027115752.1_protein_trichome_birefringence-like_10_[Coffea_arabica]	472	71868	455	0	697		CDP03616.1	472	71.648	455	0	695
jcf7180007721057.g3631	388	XP_027072325.1_E3_ubiquitin-protein_ligase_UPL4_isoform_X3_[Coffea_arabica]	1541	83938	386	0	676		CDP06701.1	1538	84.197	386	0	675
jcf7180007721069.g3633	805	XP_027071529.1_uncharacterized_protein_LOC113696292_[Coffea_arabica]	807	68311	811	0	1101		CDP10087.1	794	67.694	811	0	1086
jcf7180007721073.g3634	624	XP_027084395.1_endoribonuclease_Dicer_homolog_3-like_[Coffea_arabica]	1672	67018	664	0	884		CDP19693.1	1583	74.494	494	0	752
jcf7180007721170.g3646	503	XP_027072475.1_protein_NRT1/_PTR_FAMILY_5.6-like_[Coffea_arabica]	597	72763	503	0	781		CDP06560.1	591	72.763	503	0	779
jcf7180007721170.g3647	540	XP_027068473.1_aldehyde_oxidase_GLOX-like_[Coffea_arabica]	541	79963	544	0	926		CDP06561.1	541	79.963	544	0	925
jcf7180007721183.g3648	371	XP_027066407.1_TLD_domain-containing_protein_1_isoform_X1_[Coffea_arabica]	422	70652	368	0	532		CDP20433.1	422	70.924	368	0	533
jcf7180007721244.g3655	738	XP_027093676.1_uncharacterized_protein_LOC113714077_[Coffea_arabica]	1827	49103	725	0	741		CDO99984.1	847	57.542	179	2.48e-58	213
jcf7180007721253.g3656	461	XP_027120190.1_Fanconi_anemia_group_I_protein_homolog_[Coffea_arabica]	1433	66522	460	0	583		CDO98846.1	1436	67.174	460	0	589
jcf7180007721301.g3665	638	XP_027122131.1_exocyst_complex_component_EXO70E2-like_[Coffea_arabica]	640	64678	637	0	865		CDP17382.1	640	64.678	637	0	865
jcf7180007721459.g3680	683	XP_027121188.1_putative_E3_ubiquitin-protein_ligase_RF298_isoform_X1_[Coffea_arabica]	883	60819	684	0	806		CDO98955.1	885	60.496	686	0	799
jcf7180007721507.g3683	288	XP_027061414.1_probable_serine/threonine-protein_kinase_At1g54610_isoform_X2_[Coffea_arabica]	699	87189	281	0	525		CDP14791.1	699	87.189	281	0	523
jcf7180007721563.g3691	433	XP_027101955.1_histone-lysine_N-methyltransferase_setd3_[Coffea_arabica]	512	80974	431	0	715		CDP16667.1	512	80.974	431	0	714
jcf7180007721565.g3692	663	XP_027073737.1_cysteine-rich_receptor-like_protein_kinase_42_[Coffea_arabica]	657	69970	666	0	952		CDP02086.1	657	70.12	666	0	955
jcf7180007721630.g3694	304	XP_027061777.1_aspartate_aminotransferase,_mitochondrial-like_[Coffea_arabica]	420	88779	303	0	585		CDP15949.1	420	87.129	303	0	577
jcf7180007721831.g3707	537	XP_027119538.1_GTP-binding_protein_OBGC,_chloroplastic_[Coffea_arabica]	630	71009	545	0	698		CDO98893.1	630	71.376	545	0	684
jcf7180007721887.g3709	548	XP_027106447.1_protein_NRT1/_PTR_FAMILY_7.3-like_[Coffea_arabica]	587	77528	534	0	855		CDO97706.1	587	77.341	534	0	855
jcf7180007721902.g3711	428	XP_027072925.1_importin-5-like_[Coffea_arabica]	1116	85746	456	0	752		CDP17582.1	995	85.067	375	0	634
jcf7180007721934.g3715	289	XP_027061797.1_prohibitin-1,_mitochondrial-like_[Coffea_arabica]	289	89619	289	0	506		CDP15881.1	316	89.273	289	3.69e-180	503
jcf7180007721944.g3718	319	XP_027121231.1_probable_serine_incorporator_[Coffea_arabica]	410	85220	318	0	560		CDO98987.1	410	85.22	318	0	560
jcf7180007722063.g3722	407	XP_027115207.1_signal_peptide_peptidase-like_4_[Coffea_arabica]	542	85714	406	0	706		CDP08805.1	542	85.468	406	0	705
jcf7180007722076.g3724	382	XP_027099337.1_protein_PECTIC_ARABINOGALACTAN_SYNTHESIS-RELATED-like_[Coffea_arabica]	600	97113	381	0	781		CDP13245.1	564	96.85	381	0	781
jcf7180007722082.g3725	464	XP_027111212.1_rubisco_accumulation_factor_1.1,_chloroplastic-like_[Coffea_arabica]	449	73434	463	0	617
jcf7180007722157.g3729	532	XP_027125426.1_protein_NRT1/_PTR_FAMILY_4.6-like_isoform_X2_[Coffea_arabica]	596	75388	516	0	764		CDP14862.1	597	75.194	516	0	764
jcf7180007722270.g3739	349	XP_027089339.1_tetraketide_alpha-pyrone_reductase_1-like_isoform_X3_[Coffea_arabica]	330	76791	349	0	544		CDP14491.1	330	77.035	344	0	541
jcf7180007722309.g3745	686	XP_027095459.1_protein_LYK2-like_[Coffea_arabica]	416	73861	417	0	643		CDP02416.1	644	31.125	649	6.55e-88	291
jcf7180007722324.g3746	1015	XP_027072931.1_laccase-4-like_[Coffea_arabica]	561	88931	533	0	994		CDP06511.1	561	88.18	533	0	991
jcf7180007722348.g3748	761	XP_027114320.1_uncharacterized_protein_LOC113732614_[Coffea_arabica]	734	86945	743	0	1337		CDP10229.1	301	28.369	282	8.72e-36	138
jcf7180007722392.g3753	691	XP_027095239.1_FT-interacting_protein_7-like_[Coffea_arabica]	762	85268	672	0	1183		CDP14088.1	762	85.417	672	0	1185
jcf7180007722478.g3765	383	XP_027068905.1_solute_carrier_family_40_member_2-like_isoform_X1_[Coffea_arabica]	516	69464	429	0	567		CDP06418.1	512	68.765	429	0	560
jcf7180007722537.g3767	417	XP_027084296.1_DEAD-box_ATP-dependent_RNA_helicase_56_isoform_X1_[Coffea_arabica]	428	75124	402	0	577		CDP13502.1	376	74.876	402	0	571
jcf7180007722550.g3772	885	XP_027109935.1_protein_NTM1-like_9_isoform_X2_[Coffea_arabica]	631	51246	642	0	603		CDP04976.1	631	51.09	642	0	600
jcf7180007722592.g3775	413	XP_027085110.1_uncharacterized_protein_LOC113707142_[Coffea_arabica]	631	78710	310	0	530		CDP13532.1	611	78.71	310	0	529
jcf7180007722594.g3776	488	XP_027068517.1_protein_EFR3_homolog_cmp44E-like_[Coffea_arabica]	1027	78980	490	0	780		CDP18636.1	1027	78.776	490	0	780
jcf7180007722691.g3786	460	XP_027103475.1_cell_division_cycle_20.2,_cofactor_of_APC_complex-like_isoform_X1_[Coffea_arabica]	465	85408	466	0	811		CDP04948.1	465	85.408	466	0	811
jcf7180007722804.g3794	576	XP_027091504.1_root_phototropism_protein_2-like_[Coffea_arabica]	586	82813	576	0	1002		CDP04035.1	573	82.292	576	0	999
jcf7180007722911.g3797	518	XP_027114613.1_homeobox-DDT_domain_protein_RLT1-like_isoform_X2_[Coffea_arabica]	514	61583	518	0	602		CDP15514.1	578	61.197	518	0	596
jcf7180007722916.g3800	503	XP_027100478.1_uncharacterized_protein_LOC113719479_[Coffea_arabica]	665	72056	501	0	716		CDP13210.1	662	72.056	501	0	716
jcf7180007723053.g3807	405	XP_027101998.1_pectate_lyase-like_[Coffea_arabica]	410	81327	407	0	681		CDP16631.1	413	80.244	410	0	671
jcf7180007723055.g3808	435	XP_027121142.1_UDP-glycosyltransferase_75C1-like_[Coffea_arabica]	466	59132	438	0	535		CDP15120.1	466	59.132	438	0	536
jcf7180007723134.g3814	956	XP_027088780.1_mechanosensitive_ion_channel_protein_6-like_[Coffea_arabica]	953	61762	965	0	1106		CDP14532.1	995	60.765	994	0	1107
jcf7180007723240.g3819	422	XP_027102087.1_LOW_QUALITY_PROTEIN:_pescadillo_homolog_[Coffea_arabica]	601	82488	434	0	736		CDP02070.1	601	83.41	434	0	747
jcf7180007723350.g3822	882	XP_027089163.1_protein_MEI2-like_5_[Coffea_arabica]	843	72684	842	0	1252		CDP17942.1	837	72.608	836	0	1239
jcf7180007723422.g3825	576	XP_027088364.1_monosaccharide-sensing_protein_2-like_[Coffea_arabica]	742	83536	577	0	974		CDP14489.1	742	84.055	577	0	957
jcf7180007723541.g3829	550	XP_027078846.1_uncharacterized_protein_LOC113702078_isoform_X1_[Coffea_arabica]	631	65530	557	0	616		CDP02480.1	634	64.591	562	0	608
jcf7180007723541.g3830	1224	XP_027078925.1_uncharacterized_protein_LOC113702120_[Coffea_arabica]	1622	82319	1216	0	2042		CDP02479.1	1637	78.943	1249	0	2001
jcf7180007723606.g3837	835	XP_027063970.1_conserved_oligomeric_Golgi_complex_subunit_5_[Coffea_arabica]	841	82283	841	0	1302		CDP06156.1	841	82.521	841	0	1306
jcf7180007723630.g3849	488	XP_027096997.1_zinc_finger_protein_CONSTANS-LIKE_15-like_[Coffea_arabica]	506	70955	513	0	675		CDP13395.1	338	69.883	342	7.4e-152	440
jcf7180007723632.g3850	836	XP_027114816.1_pyrophosphate-energized_vacuolar_membrane_proton_pump-like_[Coffea_arabica]	761	85342	730	0	1202		CDP18241.1	780	84.762	735	0	1200
jcf7180007723640.g3853	347	XP_027079332.1_protein_furry_homolog-like_isoform_X2_[Coffea_arabica]	2152	90578	329	0	612		CDP02360.1	2152	90.881	329	0	613
jcf7180007723643.g3856	803	XP_027089162.1_probable_receptor-like_serine/threonine-protein_kinase_At4g34500_[Coffea_arabica]	566	72968	566	0	812		CDP14527.1	568	73.111	569	0	812
jcf7180007723644.g3857	782	XP_027092801.1_cellulose_synthase_A_catalytic_subunit_2_[UDP-forming]-like_[Coffea_arabica]	1096	86506	830	0	1394		CDP11417.1	1096	86.506	830	0	1394
jcf7180007723652.g3863	723	XP_027065322.1_phospholipase_D_alpha_1-like_[Coffea_arabica]	807	85201	723	0	1313		CDP10414.1	807	85.201	723	0	1313
jcf7180007723654.g3864	380	XP_027061404.1_vesicle-fusing_ATPase-like_[Coffea_arabica]	748	91185	363	0	687		CDP05917.1	729	90.909	363	0	685
jcf7180007723664.g3866	782	XP_027112032.1_E3_ubiquitin-protein_ligase_UPL3-like_isoform_X2_[Coffea_arabica]	1911	84399	782	0	1274		CDO96920.1	1911	84.399	782	0	1275
jcf7180007723677.g3871	477	XP_027073844.1_probable_polyol_transporter_6_[Coffea_arabica]	513	73292	483	0	723		CDP02044.1	514	73.499	483	0	724
jcf7180007723678.g3872	633	XP_027098116.1_adagio_protein_3-like_[Coffea_arabica]	644	88776	588	0	1084		CDP16253.1	645	88.625	589	0	1079
jcf7180007723684.g3875	369	XP_027092662.1_GDSL_esterase/lipase_At1g71250-like_[Coffea_arabica]	380	69761	377	0	555		CDP15726.1	372	55.372	363	3.83e-141	409
jcf7180007723696.g3883	679	XP_027094114.1_SART-1_family_protein_DOT2-like_[Coffea_arabica]	927	62370	675	0	660
jcf7180007723717.g3886	392	XP_027081884.1_probable_polyamine_transporter_At1g31830_isoform_X1_[Coffea_arabica]	557	77238	391	0	650		CDP19063.1	473	76.726	391	0	643
jcf7180007723720.g3889	333	XP_027116561.1_serine/threonine-protein_phosphatase_PP1-like_isoform_X1_[Coffea_arabica]	337	87188	320	0	594		CDO99225.1	326	87.461	319	0	593
jcf7180007723721.g3890	448	XP_027080203.1_O-fucosyltransferase_30_[Coffea_arabica]	511	71938	449	0	661		CDP09996.1	486	68.151	449	0	616
jcf7180007723737.g3898	561	XP_027083368.1_OTU_domain-containing_protein_5-B-like_[Coffea_arabica]	548	69504	564	0	695		CDP06885.1	548	69.149	564	0	692
jcf7180007723745.g3903	600	XP_027093685.1_guanine_nucleotide-binding_protein-like_NSN1_[Coffea_arabica]	598	81864	590	0	916		CDP03856.1	598	81.864	590	0	916
jcf7180007723756.g3906	1238	XP_027103268.1_putative_disease_resistance_protein_RGA3_[Coffea_arabica]	1241	48817	1268	0	1152		CDP17982.1	1241	48.738	1268	0	1149
jcf7180007723769.g3912	417	XP_027104135.1_uncharacterized_membrane_protein_YHL071W-like_isoform_X2_[Coffea_arabica]	443	67209	369	0	529		CDP13898.1	527	67.209	369	0	526
jcf7180007723772.g3914	629	XP_027085632.1_DNA-directed_RNA_polymerase_IV_subunit_1-like_[Coffea_arabica]	1476	68000	625	0	849		CDP09818.1	1511	68	625	0	847
jcf7180007723774.g3915	529	XP_027111774.1_monothiol_glutaredoxin-S17-like_[Coffea_arabica]	490	76560	529	0	812		CDO99552.1	490	76.371	529	0	809
jcf7180007723785.g3919	424	XP_027110733.1_cytosolic_endo-beta-N-acetylglucosaminidase_1-like_[Coffea_arabica]	755	75926	378	0	603		CDP13972.1	589	85.714	224	7.98e-141	418
jcf7180007723839.g3931	321	XP_027095603.1_clavaminate_synthase-like_protein_At3g21360_[Coffea_arabica]	321	84735	321	0	556		CDP00560.1	321	84.735	321	0	557
jcf7180007723843.g3932	388	XP_027104019.1_WD_repeat-containing_protein_WRAP73_[Coffea_arabica]	459	88742	302	0	561		CDP05375.1	459	88.742	302	0	561
jcf7180007723855.g3934	499	XP_027119921.1_probable_phosphoinositide_phosphatase_SAC9_[Coffea_arabica]	1636	82172	488	0	845		CDP08006.1	1633	81.762	488	0	841
jcf7180007723864.g3940	1335	XP_027066496.1_LOW_QUALITY_PROTEIN:_protein_virilizer_homolog_[Coffea_arabica]	1796	64914	875	0	1117		CDP10591.1	2202	65.023	1298	0	1522
jcf7180007723867.g3941	600	XP_027078347.1_DNA_repair_protein_RAD4-like_isoform_X2_[Coffea_arabica]	976	64298	591	0	725		CDP01628.1	903	55.085	590	0	577
jcf7180007723883.g3943	554	XP_027069677.1_leucine_aminopeptidase_1-like_[Coffea_arabica]	587	78655	595	0	895		CDP16585.1	526	80.228	526	0	846
jcf7180007723892.g3947	325	XP_027108259.1_COP9_signalosome_complex_subunit_1-like_[Coffea_arabica]	448	84520	323	0	554		CDP08878.1	448	84.52	323	0	554
jcf7180007723900.g3949	531	XP_027075418.1_outer_envelope_protein_80,_chloroplastic-like_[Coffea_arabica]	700	75221	452	0	640		CDP04593.1	512	72.124	452	0	627
jcf7180007723918.g3953	506	XP_027103944.1_acid_beta-fructofuranosidase-like_isoform_X1_[Coffea_arabica]	661	82574	505	0	885		CDP05324.1	539	82.178	505	0	877
jcf7180007723930.g3955	452	XP_027108856.1_endo-1,4-beta-xylanase_5-like_[Coffea_arabica]	581	63393	448	0	602		CDO97285.1	551	63.839	448	0	603
jcf7180007723945.g3960	384	XP_027065453.1_patellin-6_[Coffea_arabica]	444	86111	396	0	695		CDP06420.1	315	88.179	313	0	570
jcf7180007723958.g3962	364	XP_027091405.1_sucrose_transport_protein_SUC4-like_[Coffea_arabica]	506	82216	343	0	586		CDP00966.1	506	82.216	343	0	587
jcf7180007723965.g3965	505	XP_027109826.1_uncharacterized_protein_LOC113729786_[Coffea_arabica]	538	82210	371	0	613		CDP04921.1	446	85.879	347	0	602
jcf7180007723999.g3980	519	XP_027064678.1_pentatricopeptide_repeat-containing_protein_At1g79080,_chloroplastic-like_[Coffea_arabica]	568	82296	514	0	880		CDP13612.1	568	82.296	514	0	877
jcf7180007724009.g3982	553	XP_027108487.1_BTB/POZ_domain-containing_protein_POB1-like_isoform_X2_[Coffea_arabica]	554	88628	554	0	997		CDP08731.1	554	88.448	554	0	995
jcf7180007724011.g3983	556	XP_027100238.1_probable_leucine-rich_repeat_receptor-like_protein_kinase_At1g68400_[Coffea_arabica]	674	81183	558	0	893		CDP00654.1	674	80.824	558	0	889
jcf7180007724111.g4005	402	XP_027106852.1_LOW_QUALITY_PROTEIN:_serine/threonine-protein_kinase_SRPK-like_[Coffea_arabica]	555	84653	404	0	694		CDP07004.1	555	84.653	404	0	693
jcf7180007724134.g4007	356	XP_027096587.1_uncharacterized_protein_LOC113716452_[Coffea_arabica]	520	81461	356	0	600		CDP00228.1	520	81.18	356	0	598
jcf7180007724194.g4034	581	XP_027122608.1_15-cis-phytoene_desaturase,_chloroplastic/chromoplastic-like_[Coffea_arabica]	583	85000	580	0	1031		CDO97773.1	583	85	580	0	1031
jcf7180007724225.g4038	711	XP_027084232.1_boron_transporter_4-like_[Coffea_arabica]	669	70432	602	0	821		CDP04803.1	663	70.952	599	0	819
jcf7180007724230.g4039	592	XP_027091414.1_protein_NETWORKED_4A-like_isoform_X2_[Coffea_arabica]	627	70918	588	0	799		CDP20488.1	680	71.429	588	0	799
jcf7180007724254.g4049	486	XP_027083193.1_pentatricopeptide_repeat-containing_protein_At3g29230-like_[Coffea_arabica]	638	71726	481	0	726		CDP12936.1	488	71.933	481	0	726
jcf7180007724277.g4054	594	XP_027098422.1_putative_indole-3-acetic_acid-amido_synthetase_GH3.9_[Coffea_arabica]	606	79669	605	0	987		CDP03514.1	605	79.305	604	0	980
jcf7180007724293.g4058	450	XP_027091596.1_LOW_QUALITY_PROTEIN:_prolyl_endopeptidase-like_[Coffea_arabica]	789	77358	477	0	762		CDP07325.1	731	77.149	477	0	760
jcf7180007724299.g4061	553	XP_027062596.1_long_chain_acyl-CoA_synthetase_8-like_[Coffea_arabica]	715	86654	547	0	1005		CDP15749.1	715	86.654	547	0	1004
jcf7180007724303.g4062	360	XP_027122703.1_topless-related_protein_1-like_[Coffea_arabica]	1130	87500	360	0	645		CDO98186.1	1130	87.5	360	0	645
jcf7180007724322.g4068	361	XP_027103482.1_aluminum-activated_malate_transporter_4-like_[Coffea_arabica]	591	74595	370	0	555		CDP04954.1	496	87.454	271	1.71e-176	504
jcf7180007724370.g4080	606	XP_027087113.1_serine/threonine-protein_kinase_D6PKL2-like_[Coffea_arabica]	613	80163	615	0	971		CDP04543.1	613	80.325	615	0	975
jcf7180007724400.g4088	511	XP_027072417.1_rRNA_methyltransferase_1,_mitochondrial-like_[Coffea_arabica]	538	68959	509	0	658		CDP03255.1	538	68.566	509	0	647
jcf7180007724451.g4107	399	XP_027125965.1_probable_inactive_ATP-dependent_zinc_metalloprotease_FTSHI_2,_chloroplastic_[Coffea_arabica]	886	88705	363	0	664		CDO97991.1	498	88.154	363	0	656
jcf7180007724468.g4108	383	XP_027082594.1_serine/threonine-protein_phosphatase_BSL3_isoform_X2_[Coffea_arabica]	1010	93867	375	0	617		CDP15567.1	1012	93.867	375	0	617
jcf7180007724479.g4110	516	XP_027110403.1_calcium-dependent_protein_kinase_26-like_[Coffea_arabica]	517	70746	523	0	728		CDP05253.1	517	70.554	523	0	724
jcf7180007724479.g4112	380	XP_027110400.1_ABC_transporter_B_family_member_28-like_isoform_X3_[Coffea_arabica]	545	83234	334	0	572		CDP05251.1	731	82.335	334	0	567
jcf7180007724496.g4117	431	XP_027125692.1_nuclear_poly(A)_polymerase_1-like_[Coffea_arabica]	754	84286	420	0	757		CDO98397.1	754	84.048	420	0	755
jcf7180007724515.g4121	733	XP_027070760.1_uncharacterized_protein_LOC113695802_isoform_X1_[Coffea_arabica]	942	50192	781	0	722		CDP15391.1	942	50.448	781	0	705
jcf7180007724528.g4126	436	XP_027103814.1_WD_repeat-containing_protein_RUP2-like_[Coffea_arabica]	425	68009	422	0	543		CDP05681.1	682	30.581	327	2.13e-54	193
jcf7180007724543.g4129	634	XP_027082657.1_cucumisin-like_[Coffea_arabica]	727	67105	608	0	824		CDP00153.1	699	54.513	565	0	594
jcf7180007724543.g4130	315	XP_027085190.1_bifunctional_dTDP-4-dehydrorhamnose_3,5-epimerase/dTDP-4-dehydrorhamnose_reductase_[Coffea_arabica]	300	91946	298	0	577		CDP09826.1	300	91.946	298	0	577
jcf7180007724578.g4133	492	XP_027089895.1_glutamyl-tRNA_reductase_1,_chloroplastic-like_[Coffea_arabica]	571	90728	453	0	821		CDP00959.1	571	90.728	453	0	821
jcf7180007724590.g4134	459	XP_027082990.1_uncharacterized_protein_LOC113705360_[Coffea_arabica]	438	63147	464	0	569		CDP16174.1	352	72.951	366	0	559
jcf7180007724591.g4135	480	XP_027094577.1_allene_oxide_synthase_1,_chloroplastic-like_[Coffea_arabica]	522	74894	470	0	712		CDP07588.1	522	74.681	470	0	701
jcf7180007724597.g4139	916	XP_027124001.1_receptor-like_protein_EIX2_[Coffea_arabica]	921	58613	923	0	982		CDO98599.1	918	59.539	912	0	1003
jcf7180007724622.g4143	378	XP_027125973.1_uncharacterized_protein_LOC113742343_[Coffea_arabica]	567	77045	379	0	565		CDO98666.1	567	77.309	379	0	565
jcf7180007724623.g4144	455	XP_027125087.1_DExH-box_ATP-dependent_RNA_helicase_DExH14-like_[Coffea_arabica]	2092	89882	425	0	788		CDP17715.1	2110	86.697	436	0	773
jcf7180007724628.g4148	634	XP_027074241.1_LOW_QUALITY_PROTEIN:_formate--tetrahydrofolate_ligase-like_[Coffea_arabica]	634	91640	634	0	1173		CDP17670.1	634	91.325	634	0	1171
jcf7180007724639.g4149	664	XP_027081497.1_homeobox_protein_BEL1_homolog_[Coffea_arabica]	704	74895	717	0	990		CDP12057.1	457	76.94	451	0	668
jcf7180007724651.g4153	312	XP_027087229.1_glycerate_dehydrogenase-like_[Coffea_arabica]	386	84751	341	0	583		CDP14556.1	404	82.571	350	0	580
jcf7180007724665.g4159	367	XP_027123790.1_plasma_membrane_ATPase_1_[Coffea_arabica]	956	86685	368	0	660		CDP14881.1	950	86.685	368	0	659
jcf7180007724702.g4169	435	XP_027109991.1_GTPase-activating_protein_gyp7-like_isoform_X1_[Coffea_arabica]	570	80742	431	0	690		CDP05011.1	538	80.51	431	0	690
jcf7180007724707.g4172	360	XP_027066104.1_calmodulin-binding_protein_60_B-like_[Coffea_arabica]	631	91086	359	0	677		CDP02958.1	631	91.086	359	0	677
jcf7180007724719.g4175	1104	XP_027123333.1_tyrosine-sulfated_glycopeptide_receptor_1-like_[Coffea_arabica]	1113	76238	1111	0	1643		CDO97771.1	1111	76.736	1109	0	1651
jcf7180007724736.g4178	489	XP_027090637.1_glucan_endo-1,3-beta-glucosidase_9-like_[Coffea_arabica]	491	77131	481	0	769		CDP09239.1	988	76.875	480	0	762
jcf7180007724743.g4180	393	XP_027112602.1_probable_protein_phosphatase_2C_63_[Coffea_arabica]	399	78788	396	0	641		CDO97255.1	394	78.571	392	0	630
jcf7180007724755.g4181	480	XP_027065219.1_pentatricopeptide_repeat-containing_protein_At1g77170,_mitochondrial_[Coffea_arabica]	473	71183	465	0	696		CDP03272.1	473	71.552	464	0	699
jcf7180007724777.g4182	290	XP_027083972.1_neutral/alkaline_invertase_3,_chloroplastic-like_[Coffea_arabica]	640	89273	289	0	542		CDP06959.1	640	89.273	289	0	542
jcf7180007724791.g4183	382	XP_027110317.1_O-glucosyltransferase_rumi_homolog_[Coffea_arabica]	530	78892	379	0	658		CDP05199.1	530	78.684	380	0	657
jcf7180007724843.g4199	1059	XP_027111612.1_uncharacterized_protein_LOC113730855_[Coffea_arabica]	1050	60113	1063	0	1115		CDO99691.1	973	57.776	1061	0	1036
jcf7180007724855.g4200	582	XP_027079413.1_pentatricopeptide_repeat-containing_protein_At5g38730-like_[Coffea_arabica]	591	74007	554	0	879		CDP02378.1	591	74.188	554	0	882
jcf7180007724868.g4203	276	XP_027096797.1_serine/threonine-protein_kinase_PBS1-like_[Coffea_arabica]	463	92086	278	0	530		CDP13387.1	443	86.957	276	8e-173	489
jcf7180007724871.g4205	393	XP_027105508.1_pentatricopeptide_repeat-containing_protein_At2g36730-like_[Coffea_arabica]	427	70992	393	0	570		CDO96785.1	398	70.604	364	0	527
jcf7180007724931.g4213	285	XP_027126372.1_hypersensitive-induced_reaction_1_protein-like_[Coffea_arabica]	286	94014	284	0	560		CDP14856.1	286	94.346	283	0	558
jcf7180007724957.g4220	392	XP_027103316.1_uncharacterized_protein_LOC113724625_isoform_X1_[Coffea_arabica]	717	85714	385	0	699		CDP09645.1	728	83.756	394	0	697
jcf7180007724958.g4222	439	XP_027123360.1_protein_DENND6A-like_isoform_X1_[Coffea_arabica]	668	85922	412	0	743		CDO98469.1	668	85.922	412	0	743
jcf7180007725024.g4237	531	XP_027070491.1_ABC_transporter_B_family_member_1_[Coffea_arabica]	1409	67456	507	0	701		CDP06775.1	1246	68.103	464	0	648
jcf7180007725042.g4242	532	XP_027108036.1_zinc_finger_protein_BALDIBIS-like_isoform_X2_[Coffea_arabica]	522	78558	541	0	750		CDP07131.1	459	80.421	475	0	687
jcf7180007725079.g4253	469	XP_027110796.1_phosphoinositide_phospholipase_C_6-like_[Coffea_arabica]	584	78870	478	0	771		CDP14022.1	584	78.661	478	0	770
jcf7180007725104.g4257	296	XP_027107896.1_importin_subunit_alpha-2-like_[Coffea_arabica]	528	88514	296	0	539		CDP17235.1	528	88.514	296	0	539
jcf7180007725139.g4262	490	XP_027070776.1_aspartic_proteinase-like_protein_2_[Coffea_arabica]	495	59362	470	0	580		CDP04189.1	500	52.695	501	0	541
jcf7180007725207.g4271	648	XP_027081731.1_luminal-binding_protein_5-like_[Coffea_arabica]	664	95807	644	0	1266		CDP12195.1	664	95.963	644	0	1269
jcf7180007725218.g4276	404	XP_027122833.1_putative_phospholipid-transporting_ATPase_9_isoform_X1_[Coffea_arabica]	1153	81152	382	0	655		CDP00537.1	1197	65.473	391	0	554
jcf7180007725222.g4277	345	XP_027091497.1_putative_transcription_elongation_factor_SPT5_homolog_1_[Coffea_arabica]	1033	78655	342	0	545		CDP12009.1	1035	79.24	342	0	551
jcf7180007725282.g4284	657	XP_027105563.1_probable_LRR_receptor-like_serine/threonine-protein_kinase_At5g45780_isoform_X2_[Coffea_arabica]	620	80065	617	0	1033		CDO96836.1	617	80.227	617	0	1036
jcf7180007725282.g4285	385	XP_027111976.1_shaggy-related_protein_kinase_eta_isoform_X1_[Coffea_arabica]	380	89351	385	0	728		CDO96835.1	380	89.351	385	0	728
jcf7180007725311.g4289	963	XP_027093822.1_uncharacterized_protein_LOC113714230_[Coffea_arabica]	983	72056	934	0	1263		CDP03827.1	962	70.815	932	0	1201
jcf7180007725326.g4293	563	XP_027097024.1_probable_inactive_purple_acid_phosphatase_2_[Coffea_arabica]	653	68300	653	0	890		CDP00410.1	494	81.473	421	0	721
jcf7180007725362.g4301	402	XP_027121037.1_uncharacterized_protein_LOC113738074_[Coffea_arabica]	640	78378	407	0	621		CDO98820.1	345	75.367	341	4.08e-175	496
jcf7180007725408.g4307	597	XP_027114275.1_transcription_termination_factor_MTERF2,_chloroplastic-like_[Coffea_arabica]	609	66379	580	0	734		CDP16008.1	613	72.832	519	0	751
jcf7180007725423.g4315	451	XP_027096771.1_probable_metal-nicotianamine_transporter_YSL7_[Coffea_arabica]	689	74194	434	0	665		CDP16865.1	688	74.194	434	0	665
jcf7180007725436.g4320	308	XP_027097376.1_piezo-type_mechanosensitive_ion_channel_homolog_isoform_X5_[Coffea_arabica]	2475	88312	308	0	588		CDP17974.1	2493	71.753	308	3.79e-138	434
jcf7180007725447.g4323	464	XP_027075101.1_SRSF_protein_kinase_2-like_[Coffea_arabica]	446	86041	437	0	798		CDP01781.1	446	86.041	437	0	798
jcf7180007725485.g4325	832	XP_027083968.1_isoamylase_2,_chloroplastic-like_[Coffea_arabica]	875	63509	855	0	1091		CDP13520.1	871	63.509	855	0	1091
jcf7180007725568.g4334	468	XP_027066076.1_uncharacterized_protein_LOC113691947_[Coffea_arabica]	703	74841	473	0	673		CDP03374.1	703	74.63	473	0	671
jcf7180007725610.g4344	507	XP_027091270.1_probable_xyloglucan_glycosyltransferase_12_[Coffea_arabica]	708	89022	501	0	936		CDP01004.1	708	89.022	501	0	936
jcf7180007725622.g4346	662	XP_027061779.1_patellin-4-like_[Coffea_arabica]	588	55893	560	0	573		CDP13579.1	570	55.515	553	0	575
jcf7180007725626.g4347	1355	XP_027098374.1_TATA-binding_protein-associated_factor_BTAF1-like_isoform_X2_[Coffea_arabica]	2051	79167	1320	0	2137		CDP16963.1	2081	79.015	1320	0	2133
jcf7180007725639.g4350	551	XP_027105265.1_dnaJ_protein_homolog_ANJ1_[Coffea_arabica]	417	91627	418	0	727		CDP15561.1	417	91.627	418	0	727
jcf7180007725640.g4353	857	XP_027115159.1_FT-interacting_protein_7-like_[Coffea_arabica]	1004	82155	863	0	1489		CDP08834.1	1004	81.924	863	0	1487
jcf7180007725664.g4358	868	XP_027093427.1_chromatin_modification-related_protein_EAF1_B_isoform_X2_[Coffea_arabica]	2000	64270	904	0	954		CDP03881.1	1652	66.599	494	0	622
jcf7180007725675.g4360	2141	XP_027090802.1_protein_CELLULOSE_SYNTHASE_INTERACTIVE_3_[Coffea_arabica]	2135	78301	2143	0	3346		CDP10940.1	2135	78.395	2143	0	3348
jcf7180007725724.g4367	453	XP_027115426.1_protein_TSS_isoform_X1_[Coffea_arabica]	1910	76483	489	0	725		CDP08681.1	1004	74.065	428	0	602
jcf7180007725741.g4372	299	XP_027068940.1_beta-1,4-mannosyl-glycoprotein_4-beta-N-acetylglucosaminyltransferase-like_isoform_X2_[Coffea_arabica]	315	82095	296	0	525		CDP10440.1	364	82.432	296	0	525
jcf7180007725746.g4373	418	XP_027106567.1_cationic_amino_acid_transporter_9,_chloroplastic-like_[Coffea_arabica]	568	84343	396	0	654		CDP09447.1	568	84.343	396	0	654
jcf7180007725749.g4374	498	XP_027079451.1_probable_rhamnogalacturonate_lyase_B_[Coffea_arabica]	671	59381	517	0	624		CDP01610.1	517	59.381	517	0	620
jcf7180007725832.g4383	795	XP_027085203.1_probable_beta-D-xylosidase_6_isoform_X1_[Coffea_arabica]	816	72405	790	0	1213		CDP02677.1	784	71.899	790	0	1205
jcf7180007725855.g4391	585	XP_027067780.1_pollen_receptor-like_kinase_4_[Coffea_arabica]	647	65811	623	0	806		CDP12489.1	647	65.811	623	0	806
jcf7180007725856.g4392	426	XP_027113168.1_potassium_channel_AKT2/3_[Coffea_arabica]	848	70406	419	0	643		CDO97567.1	848	70.784	421	0	644
jcf7180007725861.g4393	548	XP_027111396.1_phosphatidylinositol-3-phosphatase_myotubularin-1-like_isoform_X2_[Coffea_arabica]	855	71168	548	0	760		CDO99847.1	857	71.168	548	0	759
jcf7180007725870.g4396	412	XP_027119995.1_LOW_QUALITY_PROTEIN:_histone-lysine_N-methyltransferase_ASHR2-like_[Coffea_arabica]	420	68421	418	0	538		CDP14660.1	420	66.746	418	7.21e-179	509
jcf7180007725911.g4402	377	XP_027111563.1_beta-glucosidase_47-like_[Coffea_arabica]	518	77568	370	0	622		CDO99725.1	498	78.108	370	0	624
jcf7180007725925.g4404	768	XP_027074568.1_LOW_QUALITY_PROTEIN:_protein_RST1-like_[Coffea_arabica]	1863	58730	756	0	856		CDP02075.1	1357	60.458	349	5.49e-126	411
jcf7180007725954.g4409	761	XP_027099926.1_sacsin-like_[Coffea_arabica]	4772	69220	744	0	1033		CDP11009.1	4772	69.355	744	0	1031
jcf7180007725954.g4410	1921	XP_027097125.1_sacsin-like_[Coffea_arabica]	4772	75855	1901	0	2941		CDP11009.1	4772	75.697	1901	0	2932
jcf7180007725998.g4419	955	XP_027072700.1_mediator_of_RNA_polymerase_II_transcription_subunit_13-like_isoform_X3_[Coffea_arabica]	1947	71776	946	0	1315		CDP18600.1	1961	70.833	960	0	1306
jcf7180007726077.g4427	896	XP_027070535.1_chromodomain-helicase-DNA-binding_protein_5-like_[Coffea_arabica]	1532	44308	975	0	672		CDP06750.1	1406	43.469	980	0	668
jcf7180007726078.g4428	402	XP_027109901.1_neutral_ceramidase_2-like_[Coffea_arabica]	782	90488	389	0	726		CDP09136.1	766	90.746	389	0	728
jcf7180007726086.g4429	1006	XP_027080755.1_FT-interacting_protein_7-like_[Coffea_arabica]	1004	89033	1003	0	1839		CDP09751.1	1005	88.634	1003	0	1823
jcf7180007726091.g4430	505	XP_027070596.1_ultraviolet-B_receptor_UVR8-like_isoform_X1_[Coffea_arabica]	497	75840	476	0	743		CDP06575.1	497	74.636	481	0	740
jcf7180007726091.g4431	588	XP_027070595.1_transcription_factor_LHW-like_[Coffea_arabica]	728	50489	614	0	562		CDP06574.1	728	51.443	589	0	553
jcf7180007726184.g4439	325	XP_027111702.1_quinone_oxidoreductase_PIG3-like_[Coffea_arabica]	326	89571	326	0	598		CDO99617.1	326	88.65	326	0	592
jcf7180007726238.g4445	653	XP_027087585.1_putative_protein_FAR1-RELATED_SEQUENCE_10_[Coffea_arabica]	681	78404	639	0	1071		CDP03979.1	243	34.545	110	3.51e-12	66.6
jcf7180007726332.g4459	410	XP_027088898.1_glucuronokinase_1-like_[Coffea_arabica]	357	77023	383	0	604		CDP04117.1	357	77.023	383	0	603
jcf7180007726343.g4464	566	XP_027126018.1_exocyst_complex_component_EXO70A1-like_[Coffea_arabica]	560	51916	574	0	558		CDO97839.1	560	51.742	574	0	556
jcf7180007726429.g4474	679	XP_027065168.1_tubulin--tyrosine_ligase-like_protein_12_isoform_X2_[Coffea_arabica]	874	76966	356	0	579		CDP03085.1	876	76.966	356	0	579
jcf7180007726435.g4477	331	XP_027106795.1_AUGMIN_subunit_7-like_[Coffea_arabica]	331	93656	331	0	646		CDP19805.1	331	93.656	331	0	646
jcf7180007726442.g4479	692	XP_027074516.1_protein_MODIFIED_TRANSPORT_TO_THE_VACUOLE_1-like_[Coffea_arabica]	699	71802	688	0	998		CDP19522.1	699	71.802	688	0	998
jcf7180007726459.g4481	756	XP_027091041.1_5'-3'_exoribonuclease_3-like_[Coffea_arabica]	1086	60603	863	0	1025		CDP07414.1	1086	60.603	863	0	1025
jcf7180007726469.g4482	356	XP_027110922.1_wall-associated_receptor_kinase-like_20_[Coffea_arabica]	637	85100	349	0	622		CDP00139.1	680	85.387	349	0	630
jcf7180007726470.g4483	389	XP_027098616.1_DNA_polymerase_alpha_subunit_B_[Coffea_arabica]	619	73973	365	0	543		CDP13305.1	592	73.699	365	0	540
jcf7180007726548.g4490	327	XP_027070563.1_peroxidase_16-like_[Coffea_arabica]	326	81994	311	0	541		CDP02994.1	326	82.315	311	0	542
jcf7180007726552.g4491	413	XP_027122490.1_C2_and_GRAM_domain-containing_protein_At5g50170-like_[Coffea_arabica]	1018	67233	412	0	576		CDP12735.1	1063	66.908	414	0	572
jcf7180007726581.g4495	614	XP_027101545.1_granule-bound_starch_synthase_1,_chloroplastic/amyloplastic-like_[Coffea_arabica]	676	78571	616	0	993		CDP12247.1	611	78.084	616	0	985
jcf7180007726581.g4496	428	XP_027079842.1_glucan_endo-1,3-beta-glucosidase_11-like_[Coffea_arabica]	463	72059	408	0	555		CDP12246.1	449	73.892	406	0	556
jcf7180007726581.g4497	702	XP_027079839.1_ubiquitin_carboxyl-terminal_hydrolase_9-like_isoform_X2_[Coffea_arabica]	921	81727	695	0	1152		CDP12245.1	928	81.688	699	0	1162
jcf7180007726749.g4513	340	XP_027106056.1_3-oxo-Delta(4,5)-steroid_5-beta-reductase-like_[Coffea_arabica]	387	70899	378	0	541		CDO97253.1	387	70.899	378	0	541
jcf7180007726826.g4521	486	XP_027087211.1_uncharacterized_protein_LOC113708807_[Coffea_arabica]	486	71694	484	0	654		CDP04361.1	486	71.488	484	0	648
jcf7180007726911.g4536	752	XP_027096658.1_cyclin-dependent_kinase_G-2-like_isoform_X2_[Coffea_arabica]	757	75391	768	0	1096		CDP13314.1	294	84.014	294	2.52e-177	513
jcf7180007726985.g4542	320	XP_027073900.1_LOW_QUALITY_PROTEIN:_polyadenylate-binding_protein_RBP47B'-like_[Coffea_arabica]	450	88889	306	0	576		CDP18029.1	450	88.889	306	0	575
jcf7180007726993.g4544	469	XP_027126622.1_beta-galactosidase_10_[Coffea_arabica]	862	77655	452	0	736		CDP18451.1	704	78.049	451	0	736
jcf7180007727001.g4548	519	XP_027078697.1_calcium-dependent_protein_kinase_SK5-like_[Coffea_arabica]	524	90038	522	0	965		CDP17874.1	493	79.671	487	0	830
jcf7180007727003.g4549	671	XP_027113911.1_L-type_lectin-domain_containing_receptor_kinase_IV.1-like_[Coffea_arabica]	672	80484	661	0	1113		CDP14355.1	672	79.879	661	0	1103
jcf7180007727024.g4557	480	XP_027122481.1_UDP-glucose_6-dehydrogenase_1_[Coffea_arabica]	480	90188	479	0	909		CDP02294.1	480	95.198	479	0	951
jcf7180007727077.g4559	374	XP_027099690.1_SWR1-complex_protein_4-like_[Coffea_arabica]	462	76567	367	0	558		CDP17045.1	462	76.839	367	0	561
jcf7180007727149.g4572	322	XP_027101127.1_ADP,ATP_carrier_protein,_mitochondrial_[Coffea_arabica]	391	90994	322	0	582		CDP20773.1	295	93.22	295	0	540
jcf7180007727165.g4575	793	XP_027104274.1_abscisic-aldehyde_oxidase-like_isoform_X1_[Coffea_arabica]	1366	68545	763	0	1075		CDP15628.1	1366	68.545	763	0	1076
jcf7180007727180.g4578	625	XP_027123614.1_L-type_lectin-domain_containing_receptor_kinase_S.1-like_[Coffea_arabica]	669	75812	616	0	950		CDP12741.1	669	75.812	616	0	950
jcf7180007727188.g4580	438	XP_027106369.1_LOW_QUALITY_PROTEIN:_probable_helicase_MAGATAMA_3_[Coffea_arabica]	823	86730	422	0	763		CDO97507.1	824	87.204	422	0	767
jcf7180007727189.g4581	333	XP_027093946.1_probable_serine/threonine-protein_kinase_PBL12_[Coffea_arabica]	621	84828	290	0	532		CDP11980.1	609	84.828	290	0	531
jcf7180007727213.g4584	578	XP_027113603.1_uncharacterized_protein_LOC113732156_[Coffea_arabica]	583	74093	579	0	894		CDP07655.1	555	75.632	554	0	874
jcf7180007727273.g4591	450	XP_027103187.1_ammonium_transporter_3_member_2-like_[Coffea_arabica]	482	71076	446	0	662		CDP06803.1	482	71.076	446	0	662
jcf7180007727305.g4600	273	XP_027113272.1_probable_serine/threonine-protein_kinase_At1g09600_isoform_X1_[Coffea_arabica]	726	89299	271	0	525		CDO97634.1	725	89.299	271	0	525
jcf7180007727306.g4601	783	XP_027087063.1_U-box_domain-containing_protein_33-like_[Coffea_arabica]	847	69231	676	0	913		CDP09046.1	846	68.639	676	0	895
jcf7180007727426.g4619	378	XP_027074819.1_ATP-dependent_DNA_helicase_DDM1_[Coffea_arabica]	756	82940	381	0	656		CDP02033.1	756	82.94	381	0	656
jcf7180007727432.g4620	721	XP_027082662.1_probable_transcriptional_regulator_SLK3_[Coffea_arabica]	879	47709	742	0	598		CDP09806.1	879	47.305	742	0	587
jcf7180007727560.g4641	327	XP_027072364.1_villin-2_[Coffea_arabica]	947	85759	323	0	588		CDP14114.1	955	86.378	323	0	592
jcf7180007727573.g4643	701	XP_027122953.1_malate_synthase,_glyoxysomal_[Coffea_arabica]	568	87316	544	0	1012		CDP15015.1	519	79.044	544	0	895
jcf7180007727579.g4645	469	XP_027097199.1_nucleobase-ascorbate_transporter_7-like_[Coffea_arabica]	535	86994	469	0	827		CDP00202.1	535	86.994	469	0	827
jcf7180007727680.g4657	530	XP_027078240.1_integrator_complex_subunit_9_homolog_isoform_X1_[Coffea_arabica]	702	65234	512	0	677		CDP08413.1	707	64.99	517	0	679
jcf7180007727709.g4660	385	XP_027116988.1_kinesin-like_protein_KIN-12B_[Coffea_arabica]	1365	75306	409	0	561		CDP10269.1	1369	74.576	413	0	556
jcf7180007727715.g4662	1044	XP_027079542.1_DNA_(cytosine-5)-methyltransferase_1B-like_[Coffea_arabica]	1553	69645	1041	0	1471		CDP11566.1	1498	70.646	1022	0	1445
jcf7180007727802.g4668	429	XP_027085643.1_trehalase-like_isoform_X2_[Coffea_arabica]	581	79551	401	0	682		CDP12200.1	597	79.551	401	0	681
jcf7180007727805.g4669	860	XP_027092451.1_protein_PLASTID_MOVEMENT_IMPAIRED_1_[Coffea_arabica]	880	70124	887	0	1190		CDP07263.1	879	70.316	886	0	1191
jcf7180007727809.g4671	599	XP_027126129.1_probable_auxin_efflux_carrier_component_1c_[Coffea_arabica]	602	91211	603	0	1128		CDO98348.1	602	91.376	603	0	1130
jcf7180007727810.g4672	484	XP_027070254.1_beta-fructofuranosidase,_insoluble_isoenzyme_1-like_[Coffea_arabica]	575	73420	459	0	726		CDP15447.1	575	72.985	459	0	717
jcf7180007727840.g4673	304	XP_027065496.1_syntaxin-121-like_[Coffea_arabica]	300	88779	303	0	525		CDP10588.1	300	88.779	303	0	525
jcf7180007727851.g4675	400	XP_027090913.1_dihydrolipoyllysine-residue_acetyltransferase_component_5_of_pyruvate_dehydrogenase_complex,_chloroplastic-like_[Coffea_arabica]	474	74564	401	0	541		CDP19725.1	474	74.314	401	0	523
jcf7180007727855.g4676	1073	XP_027097400.1_putative_U-box_domain-containing_protein_42_[Coffea_arabica]	1043	64033	1076	0	1372		CDP00495.1	1021	62.884	1075	0	1345
jcf7180007727924.g4680	665	XP_027095299.1_ETHYLENE_INSENSITIVE_3-like_3_protein_isoform_X1_[Coffea_arabica]	680	64286	686	0	793		CDP14093.1	663	65.055	641	0	779
jcf7180007727970.g4688	506	XP_027125140.1_pentatricopeptide_repeat-containing_protein_At1g73400,_mitochondrial-like_[Coffea_arabica]	586	76285	506	0	832		CDO98643.1	482	78.631	482	0	821
jcf7180007727980.g4690	406	XP_027121225.1_mitogen-activated_protein_kinase_15-like_isoform_X2_[Coffea_arabica]	563	91111	405	0	757		CDO98980.1	564	91.111	405	0	758
jcf7180007728005.g4695	732	XP_027112204.1_arginine_decarboxylase-like_[Coffea_arabica]	729	83560	736	0	1245		CDO96982.1	729	83.016	736	0	1239
jcf7180007728060.g4697	747	XP_027091751.1_subtilisin-like_protease_SBT1.9_[Coffea_arabica]	764	63852	758	0	1002		CDP01315.1	764	63.852	758	0	1002
jcf7180007728085.g4699	1067	XP_027117347.1_uncharacterized_protein_LOC113734804_isoform_X4_[Coffea_arabica]	1240	79794	1069	0	1734		CDP03506.1	1250	79.147	1079	0	1729
jcf7180007728188.g4713	388	XP_027068692.1_probable_WRKY_transcription_factor_33_[Coffea_arabica]	587	76531	392	0	606		CDP19946.1	557	76.531	392	0	606
jcf7180007728193.g4714	436	XP_027112783.1_protein_EXECUTER_1,_chloroplastic_[Coffea_arabica]	694	77117	437	0	632		CDO97385.1	695	77.169	438	0	629
jcf7180007728253.g4723	747	XP_027104705.1_pentatricopeptide_repeat-containing_protein_At2g26790,_mitochondrial-like_[Coffea_arabica]	824	55814	817	0	877		CDO99945.1	827	55.814	817	0	876
jcf7180007728287.g4724	377	XP_027106625.1_dihydroxy-acid_dehydratase,_chloroplastic-like_[Coffea_arabica]	614	91247	377	0	715		CDP09384.1	614	91.247	377	0	715
jcf7180007728291.g4726	398	XP_027097380.1_protein_GDAP2_homolog_[Coffea_arabica]	560	91709	398	0	764		CDP00397.1	560	91.457	398	0	761
jcf7180007728310.g4727	633	XP_027089486.1_rop_guanine_nucleotide_exchange_factor_1-like_[Coffea_arabica]	577	57600	500	0	535		CDP07324.1	558	60.342	527	0	580
jcf7180007728363.g4733	1888	XP_027120938.1_protein_GFS12-like_[Coffea_arabica]	1687	62245	1719	0	2081		CDO98707.1	1677	68.598	1191	0	1640
jcf7180007728379.g4736	867	XP_027125152.1_LRR_receptor-like_serine/threonine-protein_kinase_GSO1_[Coffea_arabica]	953	76766	835	0	1214		CDP16927.1	952	77.006	835	0	1195
jcf7180007728392.g4737	344	XP_027118107.1_S-adenosylmethionine_decarboxylase_proenzyme_4-like_[Coffea_arabica]	344	82081	346	0	592		CDO98960.1	344	82.081	346	0	592
jcf7180007728449.g4743	491	XP_027104987.1_endoplasmic_reticulum_metallopeptidase_1_isoform_X1_[Coffea_arabica]	916	67689	489	0	638		CDO99744.1	916	67.485	489	0	639
jcf7180007728501.g4746	338	XP_027064076.1_homogentisate_1,2-dioxygenase_[Coffea_arabica]	465	89524	315	0	600		CDP05973.1	465	89.841	315	0	601
jcf7180007728507.g4747	309	XP_027098434.1_uncharacterized_protein_LOC113717818_[Coffea_arabica]	411	86774	310	0	579		CDP13233.1	387	86.129	310	0	574
jcf7180007728528.g4753	361	XP_027093715.1_LOW_QUALITY_PROTEIN:_3-ketoacyl-CoA_thiolase_2,_peroxisomal_[Coffea_arabica]	466	78158	380	0	596		CDP03848.1	466	79.211	380	0	607
jcf7180007728549.g4754	536	XP_027087427.1_cationic_amino_acid_transporter_5-like_[Coffea_arabica]	587	77342	587	0	877		CDP18179.1	587	77.342	587	0	877
jcf7180007728558.g4757	334	XP_027106237.1_3-methyl-2-oxobutanoate_hydroxymethyltransferase_1,_mitochondrial-like_isoform_X1_[Coffea_arabica]	359	88450	329	0	577		CDO97420.1	359	88.146	329	0	575
jcf7180007728575.g4758	453	YP_817472.1_RNA_polymerase_beta'_subunit_(chloroplast)_[Coffea_arabica]	1391	94260	453	0	896
jcf7180007728651.g4765	802	XP_027094041.1_probable_serine/threonine_protein_kinase_IRE4_isoform_X1_[Coffea_arabica]	1099	71716	647	0	921		CDP07537.1	1099	71.406	647	0	918
jcf7180007728657.g4766	729	XP_027102164.1_LOW_QUALITY_PROTEIN:_pentatricopeptide_repeat-containing_protein_At3g46610-like_[Coffea_arabica]	756	65365	768	0	979		CDP16634.1	772	66.237	776	0	1006
jcf7180007728771.g4779	943	XP_027110765.1_clathrin_heavy_chain_1_[Coffea_arabica]	1706	94218	934	0	1807		CDP13994.1	1706	94.218	934	0	1807
jcf7180007728882.g4786	559	XP_027076124.1_probable_1-deoxy-D-xylulose-5-phosphate_synthase_2,_chloroplastic_[Coffea_arabica]	715	89803	559	0	1049		CDP01586.1	715	89.803	559	0	1049
jcf7180007728905.g4789	732	XP_027069166.1_probable_ADP-ribosylation_factor_GTPase-activating_protein_AGD14_isoform_X2_[Coffea_arabica]	714	65847	691	0	791		CDP03358.1	714	65.557	691	0	787
jcf7180007728965.g4792	557	XP_027112082.1_probable_alkaline/neutral_invertase_B_[Coffea_arabica]	570	77329	569	0	946		CDP18884.1	538	82.528	538	0	923
jcf7180007728992.g4794	340	XP_027068868.1_GDP-fucose_transporter_1-like_[Coffea_arabica]	344	88131	337	0	611		CDP05339.1	377	48.955	335	7.47e-103	310
jcf7180007729018.g4797	628	XP_027065172.1_uncharacterized_protein_LOC113691281_[Coffea_arabica]	633	73397	624	0	978		CDP15622.1	630	74.96	631	0	994
jcf7180007729063.g4800	522	XP_027068651.1_protein_MAIN-LIKE_1-like_isoform_X1_[Coffea_arabica]	526	74545	495	0	796		CDP10555.1	486	68.485	495	0	712
jcf7180007729099.g4806	376	XP_027070317.1_cystathionine_beta-lyase,_chloroplastic-like_[Coffea_arabica]	474	78852	331	0	518		CDP09524.1	477	76.946	334	6.55e-180	512
jcf7180007729208.g4823	986	XP_027125800.1_zinc_finger_protein_BRUTUS-like_At1g74770_isoform_X1_[Coffea_arabica]	1254	51487	975	0	981		CDP14898.1	1254	51.487	975	0	969
jcf7180007729322.g4834	752	XP_027092232.1_carbamoyl-phosphate_synthase_large_chain,_chloroplastic-like_[Coffea_arabica]	1210	90413	751	0	1433		CDP18860.1	1210	91.079	751	0	1440
jcf7180007729425.g4841	490	XP_027114630.1_probable_linoleate_9S-lipoxygenase_5_[Coffea_arabica]	854	71633	490	0	776		CDP15504.1	856	71.633	490	0	773
jcf7180007729515.g4860	402	XP_027089899.1_aldehyde_oxidase_GLOX-like_[Coffea_arabica]	560	81250	400	0	691		CDP07430.1	561	80.693	404	0	692
jcf7180007729574.g4864	935	XP_027070543.1_putative_E3_ubiquitin-protein_ligase_LIN_[Coffea_arabica]	1329	71516	976	0	1389		CDP03302.1	1369	71.516	976	0	1389
jcf7180007729593.g4865	506	XP_027083248.1_protein_FIZZY-RELATED_2-like_[Coffea_arabica]	483	91441	479	0	870		CDP09833.1	483	91.232	479	0	868
jcf7180007729608.g4866	404	XP_027097272.1_uncharacterized_protein_LOC113716918_[Coffea_arabica]	337	86391	338	0	573		CDP00352.1	287	87.5	288	3.53e-173	489
jcf7180007729684.g4880	461	XP_027108694.1_pentatricopeptide_repeat-containing_protein_At5g04810,_chloroplastic_[Coffea_arabica]	950	86432	398	0	736		CDO99926.1	727	85.93	398	0	730
jcf7180007729702.g4884	421	XP_027122397.1_uncharacterized_protein_LOC113739385_[Coffea_arabica]	471	75851	323	0	539		CDP15041.1	471	75.851	323	0	539
jcf7180007729702.g4885	495	XP_027087144.1_protein_WHAT'S_THIS_FACTOR_1_homolog,_chloroplastic-like_[Coffea_arabica]	493	68173	509	0	661		CDP04219.1	493	68.173	509	0	661
jcf7180007729703.g4886	992	XP_027089722.1_receptor_protein_kinase_CLAVATA1-like_[Coffea_arabica]	981	74124	970	0	1422		CDP07377.1	824	73.469	833	0	1201
jcf7180007729714.g4887	452	XP_027110939.1_protein_phosphatase_2C_37-like_[Coffea_arabica]	428	70861	453	0	622		CDP00134.1	428	69.757	453	0	609
jcf7180007729745.g4890	351	XP_027121883.1_protein_SRG1-like_[Coffea_arabica]	357	74719	356	0	550		CDP20114.1	357	75	356	0	551
jcf7180007729745.g4891	1214	XP_027122700.1_pyrophosphate-energized_vacuolar_membrane_proton_pump-like_[Coffea_arabica]	762	96358	659	0	1289		CDO98179.1	762	96.358	659	0	1289
jcf7180007729764.g4895	782	XP_027125959.1_dentin_sialophosphoprotein_[Coffea_arabica]	1249	53758	785	0	649		CDO97937.1	1252	54.268	785	0	654
jcf7180007729772.g4897	651	XP_027078341.1_uncharacterized_protein_LOC113701761_[Coffea_arabica]	618	76575	619	0	924		CDP02427.1	617	76.414	619	0	929
jcf7180007729894.g4911	1645	XP_027125462.1_uncharacterized_protein_LOC113741986_isoform_X1_[Coffea_arabica]	1610	67754	1656	0	2098		CDP16999.1	1608	66.748	1633	0	2019
jcf7180007730124.g4931	891	XP_027121039.1_phospholipase_D_zeta_1-like_isoform_X1_[Coffea_arabica]	1119	83726	891	0	1593		CDO98824.1	1145	83.277	891	0	1590
jcf7180007730255.g4953	460	XP_027094728.1_LOW_QUALITY_PROTEIN:_protein_ACCUMULATION_AND_REPLICATION_OF_CHLOROPLASTS_6,_chloroplastic-like_[Coffea_arabica]	815	77111	450	0	635		CDP07437.1	815	76.667	450	0	631
jcf7180007730270.g4955	714	XP_027112254.1_probable_LRR_receptor-like_serine/threonine-protein_kinase_At2g16250_[Coffea_arabica]	905	72689	714	0	1013		CDO97049.1	881	71.008	714	0	1000
jcf7180007730319.g4959	603	XP_027096881.1_protein_SDA1_homolog_isoform_X2_[Coffea_arabica]	819	72937	606	0	827		CDP13264.1	784	72.937	606	0	827
jcf7180007730336.g4961	525	XP_027112166.1_protein_DETOXIFICATION_46,_chloroplastic_isoform_X2_[Coffea_arabica]	565	68199	544	0	715		CDO96998.1	445	76.854	445	0	692
jcf7180007730339.g4963	1497	XP_027088270.1_serine/threonine-protein_kinase_ATR_isoform_X2_[Coffea_arabica]	2723	82510	1498	0	2547		CDP14533.1	2723	82.31	1498	0	2540
jcf7180007730420.g4968	639	XP_027094504.1_probable_rhamnogalacturonate_lyase_B_isoform_X1_[Coffea_arabica]	642	76063	635	0	1050		CDP00941.1	642	76.063	635	0	1052
jcf7180007730431.g4973	445	XP_027088029.1_protein_DETOXIFICATION_40-like_[Coffea_arabica]	504	64440	464	0	591		CDP11780.1	501	66.589	431	0	577
jcf7180007730459.g4974	1167	XP_027101953.1_LOW_QUALITY_PROTEIN:_protein_TPLATE_[Coffea_arabica]	1164	90154	1168	0	2152		CDP16668.1	1164	90.411	1168	0	2158
jcf7180007730483.g4977	655	XP_027100096.1_pentatricopeptide_repeat-containing_protein_At1g69290-like_[Coffea_arabica]	655	78015	655	0	1077		CDP00435.1	969	77.301	652	0	1062
jcf7180007730502.g4979	368	XP_027098198.1_sorbitol_dehydrogenase-like_[Coffea_arabica]	364	82880	368	0	619		CDP03530.1	364	82.337	368	0	617
jcf7180007730513.g4980	468	XP_027078508.1_probable_nucleolar_protein_5-2_[Coffea_arabica]	566	71780	528	0	681		CDP04715.1	422	77.327	419	0	627
jcf7180007730528.g4981	358	XP_027092450.1_uncharacterized_protein_LOC113712969_[Coffea_arabica]	409	82051	351	0	613		CDP01346.1	409	82.051	351	0	613
jcf7180007730528.g4982	340	XP_027089799.1_uncharacterized_protein_LOC113710924_isoform_X1_[Coffea_arabica]	346	80636	346	0	576		CDP01347.1	346	80.636	346	0	576
jcf7180007730567.g4986	716	XP_027079891.1_protein_FAR1-RELATED_SEQUENCE_6-like_isoform_X1_[Coffea_arabica]	705	66433	712	0	956		CDP17275.1	335	38.333	120	1.09e-16	81.6
jcf7180007730725.g5001	419	XP_027107512.1_probable_serine/threonine-protein_kinase_At1g54610_[Coffea_arabica]	581	86811	417	0	725		CDP08611.1	581	86.571	417	0	723
jcf7180007730756.g5003	870	XP_027098379.1_protein_argonaute_7-like_[Coffea_arabica]	1013	81614	892	0	1516		CDP00378.1	1013	81.278	892	0	1512
jcf7180007730910.g5015	529	XP_027089782.1_glucose-1-phosphate_adenylyltransferase_large_subunit_1-like_[Coffea_arabica]	530	83804	531	0	932		CDP07489.1	530	83.804	531	0	932
jcf7180007730912.g5016	368	XP_027116492.1_1-aminocyclopropane-1-carboxylate_oxidase_homolog_[Coffea_arabica]	373	70523	363	0	533		CDO99204.1	609	66.298	362	5.53e-169	489
jcf7180007730925.g5025	487	XP_027089077.1_probable_arabinosyltransferase_ARAD1_[Coffea_arabica]	472	72211	493	0	716		CDP11255.1	472	71.805	493	0	714
jcf7180007730928.g5026	584	XP_027080985.1_uncharacterized_protein_LOC113703723_[Coffea_arabica]	2220	79299	628	0	969		CDP18426.1	2220	79.14	628	0	967
jcf7180007730947.g5028	393	XP_027071089.1_glucomannan_4-beta-mannosyltransferase_1-like_[Coffea_arabica]	530	89796	392	0	749		CDP06773.1	530	89.796	392	0	749
jcf7180007730966.g5029	612	XP_027122430.1_pentatricopeptide_repeat-containing_protein_At4g02750-like_[Coffea_arabica]	666	66838	582	0	810		CDP16937.1	666	66.667	582	0	809
jcf7180007730972.g5030	448	XP_027112595.1_uncharacterized_protein_LOC113731494_isoform_X1_[Coffea_arabica]	822	69803	457	0	621		CDO97248.1	810	68.913	460	0	620
jcf7180007731006.g5035	555	XP_027122955.1_transcription_factor_GTE10-like_[Coffea_arabica]	782	68677	514	0	694		CDP15017.1	549	68.677	514	0	692
jcf7180007731011.g5036	332	XP_027119884.1_stearoyl-[acyl-carrier-protein]_9-desaturase,_chloroplastic_[Coffea_arabica]	396	92169	332	0	655		CDP10883.1	396	91.566	332	0	650
jcf7180007731039.g5037	421	XP_027116697.1_bifunctional_3-dehydroquinate_dehydratase/shikimate_dehydrogenase,_chloroplastic-like_[Coffea_arabica]	518	77284	405	0	592		CDP03556.1	518	77.037	405	0	590
jcf7180007731181.g5045	736	XP_027084619.1_ATP-dependent_zinc_metalloprotease_FTSH_4,_mitochondrial-like_isoform_X1_[Coffea_arabica]	714	90133	679	0	1190		CDP08271.1	700	88.348	678	0	1161
jcf7180007731260.g5061	376	XP_027098054.1_ABC_transporter_G_family_member_21_[Coffea_arabica]	678	76301	346	0	538		CDP00551.1	678	75.723	346	0	535
jcf7180007731270.g5062	477	XP_027084980.1_amino_acid_permease_8-like_[Coffea_arabica]	483	82700	474	0	825		CDP08191.1	483	82.7	474	0	825
jcf7180007731303.g5069	998	XP_027072462.1_endoribonuclease_Dicer_homolog_1-like_isoform_X1_[Coffea_arabica]	1760	84125	989	0	1728		CDP19693.1	1583	38.622	624	2.96e-115	390
jcf7180007731439.g5081	717	XP_027108624.1_potassium_transporter_26-like_[Coffea_arabica]	722	75035	717	0	1119		CDP05101.1	628	70.414	676	0	952
jcf7180007731566.g5091	493	XP_027069928.1_pentatricopeptide_repeat-containing_protein_At4g31070,_mitochondrial-like_[Coffea_arabica]	610	69777	493	0	739		CDP14252.1	610	69.98	493	0	741
jcf7180007731762.g5099	448	XP_027094732.1_U-box_domain-containing_protein_30-like_[Coffea_arabica]	448	92634	448	0	833		CDP20283.1	448	92.411	448	0	832
jcf7180007731831.g5106	507	XP_027084974.1_chaperone_protein_ClpB4,_mitochondrial_isoform_X2_[Coffea_arabica]	961	86364	506	0	896		CDP18785.1	975	87.251	502	0	897
jcf7180007731877.g5110	759	XP_027081024.1_uncharacterized_protein_LOC113703746_[Coffea_arabica]	759	66798	759	0	1066		CDP09944.1	759	67.062	759	0	1071
jcf7180007731932.g5118	506	XP_027127106.1_uncharacterized_protein_LOC113743326_[Coffea_arabica]	570	79447	506	0	863		CDP11352.1	570	79.051	506	0	854
jcf7180007731988.g5123	591	XP_027108866.1_uncharacterized_protein_LOC113728694_[Coffea_arabica]	1219	44588	619	0	574		CDO99984.1	847	41.48	581	7.49e-164	493
jcf7180007732068.g5127	1108	XP_027123006.1_lysine-specific_demethylase_REF6_[Coffea_arabica]	1281	50179	1116	0	903		CDP15069.1	1281	60.654	826	0	892
jcf7180007732194.g5138	957	XP_027088715.1_LOW_QUALITY_PROTEIN:_pumilio_homolog_2-like_[Coffea_arabica]	1028	83194	958	0	1523		CDP09091.1	1030	83.646	960	0	1510
jcf7180007732199.g5139	336	XP_027085408.1_uncharacterized_protein_LOC113707329_[Coffea_arabica]	371	85417	336	0	618		CDP04798.1	371	85.417	336	0	618
jcf7180007732201.g5140	379	XP_027124602.1_hexokinase-1-like_[Coffea_arabica]	495	81183	372	0	637		CDO97969.1	495	81.183	372	0	637
jcf7180007732203.g5141	588	XP_027080576.1_putative_glycerol-3-phosphate_transporter_4_[Coffea_arabica]	560	68831	539	0	728		CDP08349.1	560	68.831	539	0	726
jcf7180007732276.g5143	479	XP_027078459.1_LMBR1_domain-containing_protein_2_homolog_A-like_isoform_X2_[Coffea_arabica]	606	60385	520	0	561		CDP01513.1	736	67.509	277	9.65e-115	357
jcf7180007732304.g5146	351	XP_027095575.1_probable_WRKY_transcription_factor_21_[Coffea_arabica]	343	86040	351	0	597		CDP03703.1	343	85.755	351	0	594
jcf7180007732380.g5162	465	XP_027079419.1_probable_acyl-activating_enzyme_1,_peroxisomal_[Coffea_arabica]	593	80128	468	0	807		CDP01811.1	528	76.709	468	0	765
jcf7180007732386.g5163	837	XP_027100815.1_PH,_RCC1_and_FYVE_domains-containing_protein_1-like_isoform_X1_[Coffea_arabica]	1037	69324	828	0	1075		CDP00317.1	1037	68.841	828	0	1066
jcf7180007732503.g5173	715	XP_027123935.1_uncharacterized_protein_LOC113740585_[Coffea_arabica]	813	66757	734	0	926		CDO98095.1	813	66.621	734	0	923
jcf7180007732520.g5175	497	XP_027098245.1_MDIS1-interacting_receptor_like_kinase_2-like_[Coffea_arabica]	599	79513	493	0	714		CDP16975.1	599	79.108	493	0	711
jcf7180007732631.g5187	538	XP_027065572.1_probable_pectinesterase/pectinesterase_inhibitor_12_[Coffea_arabica]	545	74719	534	0	808		CDP19931.1	543	74.532	534	0	807
jcf7180007732674.g5190	402	XP_027066811.1_probable_cyclic_nucleotide-gated_ion_channel_5_[Coffea_arabica]	739	80978	368	0	621		CDP10239.1	739	80.978	368	0	621
jcf7180007732681.g5192	394	XP_027081320.1_beta-amylase_3,_chloroplastic_[Coffea_arabica]	547	84946	372	0	687		CDP13430.1	547	84.946	372	0	687
jcf7180007732736.g5197	631	XP_027085419.1_EIN3-binding_F-box_protein_1-like_[Coffea_arabica]	668	70728	632	0	882		CDP13516.1	540	72.201	536	0	760
jcf7180007732790.g5205	314	XP_027070188.1_heparan-alpha-glucosaminide_N-acetyltransferase-like_[Coffea_arabica]	520	84127	315	0	563		CDP15280.1	497	84.127	315	0	563
jcf7180007732803.g5208	351	XP_027124620.1_solute_carrier_family_25_member_44-like_[Coffea_arabica]	349	79603	353	0	538		CDO97869.1	349	80.17	353	0	539
jcf7180007732907.g5220	1131	XP_027077950.1_LRR_receptor-like_serine/threonine-protein_kinase_RPK2_[Coffea_arabica]	1128	79332	1137	0	1791		CDP02321.1	1128	79.332	1137	0	1790
jcf7180007732923.g5221	852	XP_027115407.1_DEAD-box_ATP-dependent_RNA_helicase_31-like_[Coffea_arabica]	870	69355	868	0	1091		CDP08691.1	845	69.16	869	0	1087
jcf7180007732963.g5224	437	XP_027098540.1_protein_JINGUBANG-like_[Coffea_arabica]	454	73497	449	0	593		CDP13258.1	457	72.931	447	0	592
jcf7180007732965.g5225	1139	XP_027120816.1_PH-interacting_protein-like,_partial_[Coffea_arabica]	1423	61102	1180	0	1367		CDP17076.1	1573	61.176	340	2.69e-120	408
jcf7180007733000.g5229	634	XP_027117969.1_exocyst_complex_component_SEC15B-like_[Coffea_arabica]	805	90363	633	0	1202		CDP17113.1	805	90.363	633	0	1202
jcf7180007733087.g5236	453	XP_027112819.1_root_phototropism_protein_3-like_isoform_X2_[Coffea_arabica]	538	85210	453	0	823		CDO97399.1	665	84.989	453	0	820
jcf7180007733091.g5237	551	XP_027091347.1_3-hydroxy-3-methylglutaryl-coenzyme_A_reductase_1_[Coffea_arabica]	607	77905	611	0	927		CDP07253.1	572	77.258	598	0	890
jcf7180007733110.g5243	490	XP_027091036.1_uncharacterized_protein_At4g06744-like_[Coffea_arabica]	418	73935	399	0	607		CDP01296.1	418	73.684	399	0	605
jcf7180007733122.g5245	736	XP_027110445.1_65-kDa_microtubule-associated_protein_3-like_[Coffea_arabica]	731	76892	740	0	1096		CDP05295.1	731	76.351	740	0	1090
jcf7180007733163.g5250	1209	XP_027093801.1_CLIP-associated_protein-like_[Coffea_arabica]	1437	79299	1256	0	1968		CDP03831.1	1437	79.14	1256	0	1969
jcf7180007733190.g5252	762	XP_027116793.1_uncharacterized_protein_LOC113734444_isoform_X1_[Coffea_arabica]	794	49054	793	0	641		CDO99462.1	744	46.65	791	0	576
jcf7180007733290.g5265	809	XP_027079438.1_calcium-transporting_ATPase_2,_plasma_membrane-type-like_[Coffea_arabica]	1017	88959	797	0	1418		CDP02598.1	1017	88.206	797	0	1412
jcf7180007733303.g5266	923	XP_027080966.1_probable_LRR_receptor-like_serine/threonine-protein_kinase_At3g47570_isoform_X2_[Coffea_arabica]	1045	56194	888	0	946		CDP18494.1	1062	56.328	877	0	939
jcf7180007733314.g5269	426	XP_027109862.1_uncharacterized_protein_LOC113729811_[Coffea_arabica]	952	83250	400	0	694		CDP04943.1	866	82.75	400	0	692
jcf7180007733365.g5272	1140	XP_027067681.1_uncharacterized_protein_LOC113693325_[Coffea_arabica]	1020	64440	928	0	1258		CDP15646.1	1294	63.799	1116	0	1462
jcf7180007733388.g5277	578	XP_027115489.1_laccase-6_[Coffea_arabica]	579	85690	580	0	1040		CDP08653.1	579	85.69	580	0	1038
jcf7180007733490.g5286	564	XP_027098790.1_copper-transporting_ATPase_HMA4-like_[Coffea_arabica]	971	80680	559	0	917		CDP19140.1	967	80.61	557	0	913
jcf7180007733552.g5297	656	XP_027089282.1_leucine--tRNA_ligase,_chloroplastic/mitochondrial-like_[Coffea_arabica]	972	68437	678	0	908		CDP04435.1	972	68.142	678	0	909
jcf7180007733585.g5300	463	XP_027116026.1_xyloglucan_6-xylosyltransferase_2-like_[Coffea_arabica]	460	86638	464	0	851		CDO98874.1	460	86.207	464	0	849
jcf7180007733598.g5301	761	XP_027113725.1_auxilin-related_protein_2-like_[Coffea_arabica]	990	71162	749	0	712		CDP04001.1	990	71.162	749	0	710
jcf7180007733606.g5303	410	XP_027094028.1_F-box_protein_At4g18380-like_[Coffea_arabica]	420	77546	432	0	594		CDP21114.1	420	77.778	432	0	597
jcf7180007733707.g5320	326	XP_027110060.1_soluble_starch_synthase_1,_chloroplastic/amyloplastic-like_[Coffea_arabica]	660	83077	325	0	566		CDP05054.1	657	82.462	325	0	561
jcf7180007733731.g5321	769	XP_027123838.1_formin-like_protein_8_[Coffea_arabica]	729	68121	527	0	674		CDP14925.1	1071	73.409	440	0	629
jcf7180007733778.g5325	395	XP_027082765.1_puromycin-sensitive_aminopeptidase-like_isoform_X3_[Coffea_arabica]	887	83461	393	0	700		CDP12041.1	542	83.461	393	0	701
jcf7180007733852.g5332	1065	XP_027090952.1_E3_ubiquitin-protein_ligase_listerin-like_[Coffea_arabica]	1884	61035	947	0	1102		CDP04076.1	1884	61.14	947	0	1105
jcf7180007733974.g5346	475	XP_027106598.1_uncharacterized_protein_LOC113726883_[Coffea_arabica]	506	67311	517	0	644		CDP09426.1	506	67.311	517	0	646
jcf7180007734016.g5353	306	XP_027118802.1_valine--tRNA_ligase,_chloroplastic/mitochondrial_2_[Coffea_arabica]	925	94521	292	0	584		CDP06726.1	1114	40.373	322	4.63e-69	233
jcf7180007734084.g5357	406	XP_027097585.1_chaperone_protein_dnaJ_16-like_[Coffea_arabica]	410	90463	367	0	696		CDP00217.1	410	90.463	367	0	696
jcf7180007734141.g5371	388	XP_027081228.1_GATA_transcription_factor_26_isoform_X2_[Coffea_arabica]	540	85321	327	0	529		CDP08344.1	541	85.627	327	0	530
jcf7180007734425.g5392	339	XP_027112837.1_uncharacterized_protein_LOC113731657_isoform_X1_[Coffea_arabica]	335	82335	334	0	585		CDO97425.1	335	82.335	334	0	585
jcf7180007734486.g5398	897	XP_027099680.1_receptor-like_protein_kinase_FERONIA_[Coffea_arabica]	891	56547	863	0	936		CDP19885.1	895	56.425	856	0	937
jcf7180007734520.g5404	588	XP_027089828.1_exocyst_complex_component_SEC3A_[Coffea_arabica]	888	91910	581	0	1070		CDP07584.1	888	92.083	581	0	1073
jcf7180007734549.g5415	871	XP_027113592.1_putative_pentatricopeptide_repeat-containing_protein_At5g09950_[Coffea_arabica]	1087	69561	933	0	1324		CDP07638.1	931	69.561	933	0	1325
jcf7180007734735.g5434	951	XP_027080937.1_protein_NLP6-like_[Coffea_arabica]	994	60920	1044	0	1197		CDP12190.1	994	60.786	1043	0	1195
jcf7180007734872.g5445	421	XP_027113095.1_U3_small_nucleolar_RNA-associated_protein_18_homolog_[Coffea_arabica]	560	84346	428	0	748		CDO97527.1	558	84.579	428	0	752
jcf7180007734894.g5449	455	XP_027086783.1_berberine_bridge_enzyme-like_18_[Coffea_arabica]	535	57438	484	0	553		CDP12596.1	535	57.438	484	0	547
jcf7180007734924.g5452	472	XP_027070329.1_glucan_endo-1,3-beta-glucosidase_5-like_[Coffea_arabica]	491	78903	474	0	785		CDP19937.1	491	78.27	474	0	779
jcf7180007735022.g5456	390	XP_027069629.1_S-adenosylmethionine_synthase_3_[Coffea_arabica]	390	96154	390	0	758		CDP06782.1	390	95.897	390	0	757
jcf7180007735038.g5457	1022	XP_027127413.1_pentatricopeptide_repeat-containing_protein_At1g73710-like_[Coffea_arabica]	1035	72798	1022	0	1538		CDP14720.1	981	75.774	937	0	1470
jcf7180007735150.g5464	773	XP_027104962.1_lysine-specific_demethylase_SE14-like_[Coffea_arabica]	1448	46616	783	0	622		CDO99756.1	1371	46.867	766	0	601
jcf7180007735250.g5471	501	XP_027115411.1_long_chain_acyl-CoA_synthetase_4-like_[Coffea_arabica]	659	83903	497	0	881		CDP08689.1	659	83.501	497	0	877
jcf7180007735251.g5473	710	XP_027125637.1_uncharacterized_protein_LOC113742121_isoform_X1_[Coffea_arabica]	880	70132	760	0	1073		CDP10229.1	301	24.444	270	2.17e-19	89.4
jcf7180007735311.g5477	644	XP_027089033.1_F-box/LRR-repeat_protein_10_isoform_X1_[Coffea_arabica]	644	77619	630	0	964		CDP14530.1	644	78.24	625	0	965
jcf7180007735311.g5478	329	XP_027089164.1_heterodimeric_geranylgeranyl_pyrophosphate_synthase_small_subunit,_chloroplastic-like_[Coffea_arabica]	346	78313	332	0	526		CDP21952.1	331	77.982	327	1.79e-180	506
jcf7180007735426.g5482	614	XP_027122993.1_telomere_length_regulation_protein_TEL2_homolog_isoform_X3_[Coffea_arabica]	798	74587	606	0	893		CDP15044.1	1006	74.917	606	0	897
jcf7180007735443.g5483	728	XP_027105967.1_E3_ubiquitin-protein_ligase_MBR2-like_isoform_X1_[Coffea_arabica]	724	60792	732	0	803		CDO97191.1	544	62.454	546	0	607
jcf7180007735469.g5486	578	XP_027109950.1_two-component_response_regulator-like_APRR5_[Coffea_arabica]	689	64161	572	0	708		CDP04988.1	689	64.336	572	0	712
jcf7180007735473.g5487	967	XP_027115848.1_nuclear_export_mediator_factor_Nemf-like_[Coffea_arabica]	1138	75417	960	0	1440		CDO98728.1	1138	75.417	960	0	1440
jcf7180007735554.g5490	408	XP_027093809.1_GDSL_esterase/lipase_At4g28780-like_[Coffea_arabica]	368	69608	408	0	588		CDP03830.1	368	69.363	408	0	584
jcf7180007735621.g5498	592	XP_027077225.1_IRK-interacting_protein-like_[Coffea_arabica]	587	77583	571	0	922		CDP19297.1	587	77.933	571	0	924
jcf7180007735671.g5508	433	XP_027071476.1_serine/threonine-protein_kinase_PCRK1-like_[Coffea_arabica]	426	78241	432	0	702		CDO99768.1	426	64.055	434	0	552
jcf7180007735718.g5510	363	XP_027097806.1_uncharacterized_protein_LOC113717258_isoform_X2_[Coffea_arabica]	499	78022	364	0	528		CDP00188.1	500	77.808	365	0	525
jcf7180007735722.g5511	1289	XP_027124853.1_uncharacterized_protein_LOC113741522_[Coffea_arabica]	1710	55021	1414	0	1487		CDP20873.1	1687	54.231	1359	0	1385
jcf7180007735964.g5527	517	XP_027091962.1_U-box_domain-containing_protein_44-like_[Coffea_arabica]	813	86847	517	0	925		CDP07279.1	813	86.847	517	0	925
jcf7180007736003.g5533	648	XP_027108750.1_LOW_QUALITY_PROTEIN:_probable_NOT_transcription_complex_subunit_VIP2_[Coffea_arabica]	663	86606	657	0	1096		CDP08978.1	663	86.149	657	0	1076
jcf7180007736010.g5540	858	XP_027117441.1_PH,_RCC1_and_FYVE_domains-containing_protein_1_[Coffea_arabica]	1089	75174	862	0	1303		CDO99240.1	1101	73.913	874	0	1293
jcf7180007736012.g5542	581	XP_027074382.1_uncharacterized_protein_LOC113698684_[Coffea_arabica]	651	66784	569	0	794		CDP04714.1	653	66.725	571	0	791
jcf7180007736053.g5563	823	XP_027061710.1_serine/threonine-protein_phosphatase_7_long_form_homolog_isoform_X1_[Coffea_arabica]	799	75405	740	0	1113		CDP05863.1	511	70.209	527	0	733
jcf7180007736075.g5578	700	XP_027072421.1_receptor-like_protein_46_[Coffea_arabica]	830	54293	792	0	751		CDP18587.1	830	49.002	802	0	669
jcf7180007736104.g5586	434	XP_027065978.1_probable_inactive_leucine-rich_repeat_receptor-like_protein_kinase_At3g03770_[Coffea_arabica]	787	64494	445	0	548		CDP12665.1	787	64.27	445	0	547
jcf7180007736106.g5587	309	XP_027116003.1_E3_ubiquitin-protein_ligase_SP1-like_isoform_X1_[Coffea_arabica]	344	90728	302	0	581		CDP03592.1	344	90.728	302	0	581
jcf7180007736123.g5594	672	XP_027127454.1_sodium/calcium_exchanger_NCL-like_[Coffea_arabica]	576	83212	548	0	907		CDP05978.1	487	85.163	492	0	842
jcf7180007736134.g5601	462	XP_027078371.1_NASP-related_protein_sim3_isoform_X2_[Coffea_arabica]	480	64706	493	0	572		CDP02434.1	480	64.3	493	0	569
jcf7180007736153.g5606	432	XP_027116586.1_putative_E3_ubiquitin-protein_ligase_XBAT35_isoform_X3_[Coffea_arabica]	473	68009	447	0	578		CDO99242.1	491	65.161	465	0	570
jcf7180007736207.g5622	528	XP_027094483.1_pentatricopeptide_repeat-containing_protein_At4g14850-like_[Coffea_arabica]	755	77989	527	0	878		CDP19593.1	755	78.178	527	0	879
jcf7180007736222.g5626	1183	XP_027125895.1_LOW_QUALITY_PROTEIN:_protein_PHYTOCHROME-DEPENDENT_LATE-FLOWERING_[Coffea_arabica]	1335	67957	1214	0	1411		CDO97822.1	1118	68.913	994	0	1239
jcf7180007736232.g5629	593	XP_027110648.1_adenine/guanine_permease_AZG1-like_[Coffea_arabica]	592	85989	571	0	1002		CDP13924.1	592	85.464	571	0	998
jcf7180007736239.g5633	640	XP_027088375.1_pre-mRNA-splicing_factor_ATP-dependent_RNA_helicase_DEAH7-like_isoform_X2_[Coffea_arabica]	1274	95000	640	0	1287		CDP14564.1	1371	95.631	618	0	1227
jcf7180007736264.g5636	644	XP_027083034.1_ubiquitin-like_domain-containing_protein_CIP73_[Coffea_arabica]	714	59278	609	0	588		CDP18808.1	714	59.442	609	0	590
jcf7180007736272.g5638	558	XP_027108365.1_ascorbate_transporter,_chloroplastic-like_[Coffea_arabica]	610	78976	547	0	871		CDP08800.1	610	78.976	547	0	871
jcf7180007736272.g5639	534	XP_027115217.1_cytochrome_P450_86A8-like_[Coffea_arabica]	561	86398	522	0	945		CDP08799.1	561	86.398	522	0	946
jcf7180007736288.g5641	540	XP_027119099.1_uncharacterized_protein_LOC113736362_[Coffea_arabica]	900	81096	529	0	640		CDP11172.1	902	81.096	529	0	639
jcf7180007736307.g5643	354	XP_027115381.1_mitochondrial_adenine_nucleotide_transporter_ADNT1_[Coffea_arabica]	354	93785	354	0	691		CDP08711.1	354	93.503	354	0	691
jcf7180007736338.g5646	1897	XP_027078554.1_uncharacterized_protein_LOC113701876_isoform_X1_[Coffea_arabica]	2371	62365	1852	0	1898		CDP04621.1	2351	65.467	1445	0	1612
jcf7180007736491.g5671	654	XP_027065498.1_auxin_efflux_carrier_component_2_isoform_X1_[Coffea_arabica]	618	85486	627	0	1083		CDP03009.1	618	85.646	627	0	1084
jcf7180007736499.g5674	396	XP_027085998.1_auxin_response_factor_18-like_[Coffea_arabica]	711	86339	366	0	652		CDP07102.1	698	86.538	364	0	658
jcf7180007736510.g5683	434	XP_027108218.1_SPX_domain-containing_membrane_protein_At4g22990-like_isoform_X1_[Coffea_arabica]	695	81693	437	0	731		CDP08903.1	695	81.693	437	0	731
jcf7180007736516.g5684	862	XP_027070589.1_uncharacterized_protein_LOC113695658_[Coffea_arabica]	471	62500	472	0	600		CDP06580.1	472	61.077	483	0	595
jcf7180007736531.g5686	360	XP_027088211.1_TBC1_domain_family_member_9B-like_[Coffea_arabica]	837	78820	373	0	578		CDP04338.1	838	78.82	373	0	578
jcf7180007736551.g5690	317	XP_027121695.1_amino_acid_transporter_AVT6E-like_[Coffea_arabica]	486	86751	317	0	533		CDO98187.1	486	86.751	317	0	533
jcf7180007736605.g5703	464	XP_027079732.1_serine/threonine-protein_kinase_STY17-like_[Coffea_arabica]	438	72967	418	0	617		CDP13451.1	386	71.355	391	0	568
jcf7180007736609.g5704	418	XP_027110165.1_plastidial_pyruvate_kinase_2-like_[Coffea_arabica]	578	93496	369	0	713		CDP05116.1	405	93.784	370	0	714
jcf7180007736609.g5705	638	XP_027103650.1_uncharacterized_protein_LOC113724935_[Coffea_arabica]	640	68829	632	0	842		CDP05114.1	640	68.829	632	0	843
jcf7180007736613.g5706	315	XP_027106278.1_copper-transporting_ATPase_PAA1,_chloroplastic-like_[Coffea_arabica]	953	88889	315	0	570		CDO97451.1	718	88.571	315	0	568
jcf7180007736614.g5707	690	XP_027078598.1_probable_inactive_receptor_kinase_At5g10020_[Coffea_arabica]	1068	78696	690	0	1070		CDP12924.1	1068	78.551	690	0	1071
jcf7180007736661.g5715	544	XP_027116500.1_protein_SLOW_WALKER_1-like_[Coffea_arabica]	541	84162	543	0	935		CDP03567.1	541	83.978	543	0	933
jcf7180007736669.g5716	679	XP_027126084.1_phospholipid:diacylglycerol_acyltransferase_1-like_[Coffea_arabica]	679	81633	686	0	1149		CDO97866.1	679	81.525	682	0	1142
jcf7180007736671.g5719	661	XP_027075434.1_uncharacterized_protein_LOC113699337_[Coffea_arabica]	719	76518	626	0	989		CDP01464.1	719	76.518	626	0	990
jcf7180007736673.g5720	571	XP_027121012.1_protein_high_chlorophyll_fluorescent_107-like_[Coffea_arabica]	676	82726	521	0	897		CDO98768.1	676	82.726	521	0	897
jcf7180007736696.g5728	447	XP_027093100.1_protein_trichome_berefringence-like_7_[Coffea_arabica]	438	70657	426	0	635		CDP12015.1	432	70.588	425	0	633
jcf7180007736697.g5729	484	XP_027085618.1_pentatricopeptide_repeat-containing_protein_At5g24830-like_isoform_X1_[Coffea_arabica]	584	59226	439	0	544		CDP14455.1	584	59.226	439	0	544
jcf7180007736787.g5744	624	XP_027090527.1_endoglucanase_9-like_[Coffea_arabica]	632	71545	615	0	883		CDP18285.1	632	71.707	615	0	885
jcf7180007736802.g5752	1095	XP_027061528.1_LRR_receptor-like_serine/threonine-protein_kinase_[Coffea_arabica]	1095	81404	1097	0	1811		CDP13676.1	1095	81.586	1097	0	1811
jcf7180007736812.g5755	358	XP_027092023.1_aspartic_proteinase_Asp1-like_isoform_X2_[Coffea_arabica]	449	72881	354	0	530		CDP10935.1	419	74.455	321	1.37e-175	498
jcf7180007736814.g5757	686	XP_027080686.1_LOW_QUALITY_PROTEIN:_G-type_lectin_S-receptor-like_serine/threonine-protein_kinase_SD2-5_[Coffea_arabica]	776	79275	690	0	1111		CDP13521.1	776	78.696	690	0	1089
jcf7180007736830.g5762	717	XP_027075034.1_AUGMIN_subunit_5-like_isoform_X2_[Coffea_arabica]	808	75524	715	0	1078		CDP02345.1	809	75.664	715	0	1078
jcf7180007736858.g5766	302	XP_027089680.1_transcription_factor_DIVARICATA-like_[Coffea_arabica]	308	81579	304	0	520		CDP09156.1	286	77.888	303	1.49e-174	488
jcf7180007736862.g5769	1031	XP_027061930.1_probable_LRR_receptor-like_serine/threonine-protein_kinase_At3g47570_[Coffea_arabica]	1088	55728	1030	0	1062		CDP09876.1	1009	55.825	1030	0	1052
jcf7180007736878.g5776	298	XP_027076375.1_ATPase_family_AAA_domain-containing_protein_3C-like_[Coffea_arabica]	636	87500	296	0	522		CDP02011.1	637	87.162	296	0	521
jcf7180007736950.g5787	352	XP_027088986.1_protein_EXORDIUM-like_5_[Coffea_arabica]	364	87539	321	0	524		CDP14493.1	283	87.633	283	4.32e-162	458
jcf7180007736961.g5790	505	XP_027064910.1_subtilisin-like_protease_SBT5.3_[Coffea_arabica]	769	73127	387	0	571		CDP06146.1	769	73.385	387	0	574
jcf7180007736978.g5791	937	XP_027088140.1_leucine-rich_repeat_receptor-like_protein_kinase_PXL1_isoform_X1_[Coffea_arabica]	1013	83565	937	0	1589		CDP04271.1	973	83.458	937	0	1591
jcf7180007736997.g5792	382	XP_027068609.1_DEAD-box_ATP-dependent_RNA_helicase_17_isoform_X3_[Coffea_arabica]	516	72222	378	0	556		CDP03048.1	591	72.487	378	0	561
jcf7180007737021.g5801	534	XP_027067779.1_U-box_domain-containing_protein_35-like_[Coffea_arabica]	781	76923	520	0	782		CDP12490.1	800	76.923	520	0	781
jcf7180007737047.g5807	694	XP_027107294.1_putative_late_blight_resistance_protein_homolog_R1A-3_isoform_X1_[Coffea_arabica]	890	51983	706	0	662		CDP18959.1	890	51.983	706	0	661
jcf7180007737062.g5810	1418	XP_027109829.1_altered_inheritance_of_mitochondria_protein_3-like_isoform_X1_[Coffea_arabica]	1382	51366	1501	0	1117		CDP20825.1	1384	51.436	1497	0	1137
jcf7180007737101.g5813	729	XP_027126186.1_1-phosphatidylinositol-3-phosphate_5-kinase_FAB1B-like_isoform_X2_[Coffea_arabica]	1834	49341	835	0	689		CDP03026.1	1795	57.855	802	0	850
jcf7180007737108.g5818	685	XP_027121286.1_probable_linoleate_9S-lipoxygenase_5_[Coffea_arabica]	882	47770	695	0	681		CDP15504.1	856	46.763	695	0	677
jcf7180007737108.g5819	500	XP_027113155.1_uncharacterized_protein_LOC113731868_[Coffea_arabica]	530	69133	473	0	660		CDP03972.1	502	66.337	505	0	663
jcf7180007737208.g5829	972	XP_027100809.1_serine/threonine-protein_kinase_BRI1-like_2_[Coffea_arabica]	1128	79000	1000	0	1598		CDP05464.1	1128	79.4	1000	0	1602
jcf7180007737255.g5835	434	XP_027091376.1_protein_translocase_subunit_SECA2,_chloroplastic-like_[Coffea_arabica]	1064	79381	388	0	625		CDP10988.1	132	84.091	132	5.54e-76	236
jcf7180007737335.g5853	596	XP_027090455.1_probable_inactive_receptor-like_protein_kinase_At3g56050_[Coffea_arabica]	691	66993	612	0	758		CDP09230.1	691	67.157	612	0	765
jcf7180007737377.g5860	572	XP_027064910.1_subtilisin-like_protease_SBT5.3_[Coffea_arabica]	769	68806	561	0	790		CDP06146.1	769	68.984	561	0	792
jcf7180007737442.g5865	463	XP_027121834.1_pentatricopeptide_repeat-containing_protein_At1g09220,_mitochondrial-like_[Coffea_arabica]	478	64463	484	0	634		CDP21013.1	478	64.463	484	0	634
jcf7180007737519.g5876	973	XP_027123629.1_AP-3_complex_subunit_delta-like_[Coffea_arabica]	976	72100	957	0	1374		CDO98419.1	976	72.205	957	0	1378
jcf7180007737538.g5881	388	XP_027117163.1_autophagy-related_protein_18a-like_[Coffea_arabica]	427	76757	370	0	548		CDP03519.1	427	77.027	370	0	549
jcf7180007737543.g5883	547	XP_027076193.1_callose_synthase_5-like_[Coffea_arabica]	1893	84860	535	0	961		CDP04693.1	1912	84.86	535	0	961
jcf7180007737571.g5887	653	XP_027115995.1_putative_E3_ubiquitin-protein_ligase_LIN-1_isoform_X1_[Coffea_arabica]	1302	77143	665	0	1055		CDO98856.1	1327	77.177	666	0	1057
jcf7180007737582.g5888	444	XP_027119571.1_uncharacterized_protein_LOC113736695_isoform_X1_[Coffea_arabica]	795	63596	456	0	583		CDO99463.1	1557	56.92	448	8.51e-157	485
jcf7180007737584.g5889	405	XP_027062233.1_cytochrome_b561_and_DOMON_domain-containing_protein_At5g47530-like_[Coffea_arabica]	404	67885	383	0	524		CDP18260.1	404	67.885	383	0	522
jcf7180007737657.g5895	362	XP_027098797.1_UDP-glucuronic_acid_decarboxylase_2-like_[Coffea_arabica]	440	69213	445	0	569		CDP17130.1	222	81.982	222	1.94e-128	371
jcf7180007737678.g5898	421	XP_027121135.1_probable_serine/threonine-protein_kinase_At1g54610_[Coffea_arabica]	579	87112	419	0	702		CDO98917.1	559	83.095	420	0	649
jcf7180007737740.g5915	972	XP_027072384.1_uncharacterized_protein_LOC113697115_[Coffea_arabica]	1145	62154	975	0	1177		CDP02952.1	1101	61.506	943	0	1114
jcf7180007737774.g5924	555	XP_027089378.1_CCR4-NOT_transcription_complex_subunit_4-like_isoform_X1_[Coffea_arabica]	844	64717	547	0	606		CDP04315.1	844	64.351	547	0	622
jcf7180007737778.g5925	406	XP_027078824.1_peptidyl-prolyl_cis-trans_isomerase_CYP65-like_isoform_X2_[Coffea_arabica]	525	82555	407	0	648		CDP02603.1	594	82.555	407	0	645
jcf7180007737793.g5926	553	XP_027118372.1_uncharacterized_protein_LOC113735571_[Coffea_arabica]	582	80399	551	0	843		CDP17084.1	582	80.399	551	0	843
jcf7180007737797.g5927	491	XP_027081783.1_uncharacterized_protein_LOC113704224_[Coffea_arabica]	387	76744	344	0	554		CDP09890.1	298	77.7	287	1.33e-165	474
jcf7180007737804.g5929	653	XP_027080715.1_uncharacterized_protein_LOC113703518_[Coffea_arabica]	1712	81579	570	0	978		CDP13537.1	1658	81.579	570	0	977
jcf7180007737810.g5930	471	XP_027085911.1_vacuolar-sorting_receptor_7-like_[Coffea_arabica]	632	82505	463	0	816		CDP18160.1	632	82.505	463	0	816
jcf7180007737850.g5934	1351	XP_027075495.1_probable_transcription-associated_protein_1_[Coffea_arabica]	1706	91165	1313	0	2433		CDP01903.1	3863	90.379	1320	0	2419
jcf7180007737852.g5935	463	XP_027098442.1_protein_LOW_PSII_ACCUMULATION_1,_chloroplastic-like_[Coffea_arabica]	461	80086	467	0	718		CDP03513.1	461	79.443	467	0	714
jcf7180007737877.g5938	530	XP_027126513.1_cell_division_cycle_protein_48_homolog_[Coffea_arabica]	814	91321	530	0	1004		CDP16951.1	814	91.698	530	0	1007
jcf7180007737921.g5943	366	XP_027126771.1_nuclear_pore_complex_protein_NUP35_[Coffea_arabica]	336	75543	368	0	525		CDO97989.1	336	75.543	368	0	524
jcf7180007737935.g5946	380	XP_027080506.1_jmjC_domain-containing_protein_7-like_[Coffea_arabica]	396	71883	377	0	550		CDP07169.1	420	73.404	376	0	549
jcf7180007738005.g5964	998	XP_027064659.1_uncharacterized_protein_LOC113690787_[Coffea_arabica]	1137	37574	1014	0	630
jcf7180007738048.g5971	825	XP_027089797.1_beta-galactosidase_3-like_[Coffea_arabica]	854	79854	824	0	1434		CDP07463.1	850	79.369	824	0	1421
jcf7180007738074.g5976	387	XP_027070278.1_leucine-rich_repeat_receptor-like_serine/threonine-protein_kinase_BAM1_[Coffea_arabica]	442	72864	398	0	544		CDP18529.1	442	71.608	398	0	540
jcf7180007738075.g5977	361	XP_027117405.1_PTI1-like_tyrosine-protein_kinase_3_[Coffea_arabica]	360	91111	360	0	663		CDP20710.1	317	93.291	313	0	591
jcf7180007738092.g5984	848	XP_027090569.1_LOW_QUALITY_PROTEIN:_ATPase_family_AAA_domain-containing_protein_At1g05910-like_[Coffea_arabica]	1194	83255	854	0	1368		CDP11492.1	1199	83.607	854	0	1389
jcf7180007738123.g5992	470	XP_027075509.1_uncharacterized_protein_LOC113699371_isoform_X1_[Coffea_arabica]	467	81857	463	0	791		CDP02605.1	467	81.857	463	0	791
jcf7180007738183.g6004	2141	XP_027076610.1_transformation/transcription_domain-associated_protein-like_[Coffea_arabica]	3905	89390	2149	0	3995		CDP01903.1	3863	89.111	2149	0	3963
jcf7180007738200.g6012	316	XP_027092830.1_annexin_D1-like_[Coffea_arabica]	316	80380	316	0	530		CDP01046.1	316	81.013	316	0	531
jcf7180007738201.g6013	423	XP_027078273.1_probable_protein_phosphatase_2C_46_isoform_X1_[Coffea_arabica]	393	90231	389	0	725		CDP01847.1	393	89.717	389	0	719
jcf7180007738253.g6016	389	XP_027115718.1_9-cis-epoxycarotenoid_dioxygenase_NCED6,_chloroplastic-like_[Coffea_arabica]	598	65962	426	0	573		CDO99408.1	506	77.204	329	0	551
jcf7180007738258.g6017	339	XP_027125088.1_protein_PAF1_homolog_[Coffea_arabica]	706	81416	339	0	560		CDO97975.1	706	81.121	339	0	558
jcf7180007738282.g6024	506	XP_027089880.1_sugar_transport_protein_5-like_[Coffea_arabica]	505	80040	506	0	822		CDP01050.1	505	80.04	506	0	817
jcf7180007738299.g6026	350	XP_027075481.1_D-2-hydroxyglutarate_dehydrogenase,_mitochondrial_isoform_X5_[Coffea_arabica]	517	85714	350	0	589		CDP01960.1	210	83.333	210	1.7e-127	368
jcf7180007738339.g6030	466	XP_027095556.1_transmembrane_9_superfamily_member_2-like_[Coffea_arabica]	585	68094	467	0	650		CDP05446.1	585	67.666	467	0	622
jcf7180007738352.g6032	339	XP_027110058.1_PP2A_regulatory_subunit_TAP46-like_[Coffea_arabica]	401	80838	334	0	543		CDP05051.1	400	81.138	334	0	556
jcf7180007738361.g6037	340	XP_027103659.1_calmodulin-interacting_protein_111-like_[Coffea_arabica]	840	89666	329	0	596		CDP05122.1	840	89.666	329	0	597
jcf7180007738404.g6041	1210	XP_027110545.1_uncharacterized_protein_LOC113730214_isoform_X1_[Coffea_arabica]	1093	60784	1122	0	1201		CDP13868.1	1085	60.498	1124	0	1198
jcf7180007738451.g6048	338	XP_027061492.1_pentatricopeptide_repeat-containing_protein_At1g03560,_mitochondrial-like_[Coffea_arabica]	674	84821	336	0	600		CDP14739.1	657	84.821	336	0	599
jcf7180007738492.g6055	398	XP_027113287.1_protein_FAR1-RELATED_SEQUENCE_11_isoform_X1_[Coffea_arabica]	685	82805	442	0	754		CDP03979.1	243	37.838	111	1.2e-12	67.0
jcf7180007738630.g6070	545	XP_027065185.1_probable_polyamine_oxidase_5_[Coffea_arabica]	556	78584	551	0	866		CDP03163.1	556	78.403	551	0	863
jcf7180007738637.g6071	480	XP_027122948.1_protein_NUCLEAR_FUSION_DEFECTIVE_4-like_isoform_X2_[Coffea_arabica]	490	68542	480	0	650		CDP16703.1	593	88.333	480	0	838
jcf7180007738670.g6076	479	XP_027124965.1_protein_STICHEL-like_2_[Coffea_arabica]	990	60861	488	0	548		CDP15080.1	990	62.099	467	0	548
jcf7180007738681.g6077	396	XP_027089562.1_riboflavin_biosynthesis_protein_PYRR,_chloroplastic-like_[Coffea_arabica]	616	84932	365	0	628		CDP04196.1	616	84.11	365	0	620
jcf7180007738686.g6078	382	XP_027083753.1_probable_indole-3-pyruvate_monooxygenase_YUCCA4_[Coffea_arabica]	349	78779	344	0	581		CDP04838.1	398	80.357	336	0	578
jcf7180007738688.g6079	521	XP_027069957.1_laccase-17-like_[Coffea_arabica]	586	83231	489	0	845		CDP06592.1	563	83.264	484	0	836
jcf7180007738711.g6086	434	XP_027098234.1_probable_potassium_transporter_17_[Coffea_arabica]	734	83924	423	0	744		CDP05427.1	752	83.452	423	0	743
jcf7180007738782.g6099	829	XP_027065412.1_sucrose_synthase_[Coffea_arabica]	806	91687	806	0	1548		CDP03035.1	806	91.687	806	0	1548
jcf7180007738799.g6103	577	XP_027072370.1_ruBisCO_large_subunit-binding_protein_subunit_beta,_chloroplastic-like_[Coffea_arabica]	609	85550	609	0	1008		CDP18583.1	609	85.878	609	0	1008
jcf7180007738801.g6104	315	XP_027121146.1_bifunctional_3-dehydroquinate_dehydratase/shikimate_dehydrogenase,_chloroplastic_isoform_X2_[Coffea_arabica]	523	83673	294	0	526		CDO98928.1	523	83.673	294	0	521
jcf7180007738802.g6105	1025	XP_027077438.1_MDIS1-interacting_receptor_like_kinase_2-like_[Coffea_arabica]	1072	62367	1031	0	1212		CDP01047.1	973	60.079	1012	0	1113
jcf7180007738804.g6107	441	XP_027063125.1_agmatine_coumaroyltransferase-2-like_[Coffea_arabica]	435	81007	437	0	740		CDP07005.1	435	81.007	437	0	741
jcf7180007738970.g6127	493	XP_027089656.1_brefeldin_A-inhibited_guanine_nucleotide-exchange_protein_1-like_isoform_X2_[Coffea_arabica]	1279	64924	459	0	571		CDP14481.1	1724	64.052	459	0	568
jcf7180007738991.g6129	876	XP_027085587.1_pleiotropic_drug_resistance_protein_1-like_[Coffea_arabica]	1463	81839	881	0	1512		CDP04832.1	3106	81.705	880	0	1506
jcf7180007739089.g6146	476	XP_027099170.1_putative_clathrin_assembly_protein_At2g25430_[Coffea_arabica]	470	67775	481	0	643		CDP05533.1	450	65.481	478	0	618
jcf7180007739123.g6153	866	XP_027126070.1_LOW_QUALITY_PROTEIN:_uncharacterized_protein_LOC113742434_[Coffea_arabica]	799	68048	748	0	975		CDO98036.1	1134	67.379	889	0	1131
jcf7180007739143.g6158	522	XP_027091560.1_cytochrome_P450_CYP82D47-like_[Coffea_arabica]	526	52834	494	0	526		CDP07595.1	880	52.834	494	1.39e-177	526
jcf7180007739169.g6159	937	XP_027065643.1_LOW_QUALITY_PROTEIN:_kinesin-like_protein_KIN-5C_[Coffea_arabica]	1009	79888	895	0	1477		CDP15444.1	1020	78.698	906	0	1474
jcf7180007739238.g6165	1012	XP_027070296.1_FT-interacting_protein_7_[Coffea_arabica]	1025	80780	1025	0	1615		CDP19726.1	1025	80	1025	0	1611
jcf7180007739241.g6166	724	XP_027089792.1_phosphomethylpyrimidine_synthase,_chloroplastic_isoform_X3_[Coffea_arabica]	1236	91587	630	0	1228		CDP09163.1	647	91.587	630	0	1224
jcf7180007739266.g6170	317	XP_027107849.1_uncharacterized_protein_LOC113727729_[Coffea_arabica]	317	81073	317	0	553		CDP17206.1	317	81.073	317	0	553
jcf7180007739267.g6171	510	XP_027102303.1_glutamate_receptor_3.7-like_isoform_X1_[Coffea_arabica]	912	71345	513	0	751		CDP11784.1	912	71.345	513	0	749
jcf7180007739274.g6180	474	XP_027097290.1_SNF1-related_protein_kinase_regulatory_subunit_gamma-1-like_isoform_X1_[Coffea_arabica]	440	72009	468	0	605		CDP00297.1	440	72.009	468	0	607
jcf7180007739274.g6181	615	XP_027101620.1_pentatricopeptide_repeat-containing_protein_At2g02750_[Coffea_arabica]	621	65316	617	0	844		CDP07867.1	621	64.506	617	0	838
jcf7180007739276.g6182	808	XP_027111522.1_ABC_transporter_G_family_member_28-like_isoform_X4_[Coffea_arabica]	881	79238	814	0	1282		CDO99767.1	1128	79.361	814	0	1281
jcf7180007739302.g6190	1477	XP_027115645.1_pleiotropic_drug_resistance_protein_2-like_isoform_X1_[Coffea_arabica]	1476	85081	1488	0	2622		CDO99881.1	1461	84.367	1484	0	2590
jcf7180007739349.g6199	528	XP_027114413.1_5'-3'_exoribonuclease_4-like_[Coffea_arabica]	980	60038	533	0	638		CDP08580.1	980	59.662	533	0	639
jcf7180007739422.g6209	705	XP_027072504.1_pentatricopeptide_repeat-containing_protein_At1g56690,_mitochondrial-like_[Coffea_arabica]	705	74465	701	0	1118		CDP18591.1	705	73.752	701	0	1108
jcf7180007739481.g6217	804	XP_027104594.1_coiled-coil_domain-containing_protein_18-like_[Coffea_arabica]	941	65979	776	0	966		CDP00006.1	941	65.851	776	0	963
jcf7180007739483.g6218	746	XP_027115259.1_RAB6A-GEF_complex_partner_protein_1-like_[Coffea_arabica]	1129	90470	745	0	1377		CDP08777.1	1129	91.007	745	0	1387
jcf7180007739534.g6230	894	XP_027125486.1_respiratory_burst_oxidase_homolog_protein_C-like_[Coffea_arabica]	933	82403	932	0	1553		CDO98277.1	933	82.851	933	0	1534
jcf7180007739540.g6231	432	XP_027126988.1_F-box/kelch-repeat_protein_At3g23880-like_[Coffea_arabica]	442	65789	418	0	556		CDP14709.1	442	65.311	418	0	555
jcf7180007739547.g6232	382	XP_027066909.1_uncharacterized_protein_LOC113692642_isoform_X2_[Coffea_arabica]	379	75066	381	0	584		CDP15404.1	379	75.066	381	0	584
jcf7180007739596.g6237	424	XP_027079083.1_cellulose_synthase_A_catalytic_subunit_5_[UDP-forming]-like_[Coffea_arabica]	1095	91094	393	0	750		CDP12843.1	1093	90.863	394	0	749
jcf7180007739616.g6239	681	XP_027077205.1_probable_endo-1,3(4)-beta-glucanase_ARB_01444_[Coffea_arabica]	735	81738	679	0	1178		CDP02389.1	735	81.296	679	0	1176
jcf7180007739617.g6240	298	XP_027091368.1_probable_serine/threonine-protein_kinase_PBL21_isoform_X2_[Coffea_arabica]	383	86395	294	0	521		CDP07283.1	373	86.054	294	0	519
jcf7180007739673.g6249	560	XP_027098240.1_THO_complex_subunit_2-like_[Coffea_arabica]	1889	64727	567	0	578
jcf7180007739704.g6250	379	XP_027093984.1_LOW_QUALITY_PROTEIN:_tetratricopeptide_repeat_protein_4_homolog_[Coffea_arabica]	368	71618	377	0	540		CDP03808.1	363	63.83	376	6.56e-159	454
jcf7180007739827.g6261	994	XP_027111933.1_protein_SCAR3-like_[Coffea_arabica]	1413	45629	1041	0	649		CDO96793.1	1066	55.172	551	3.99e-143	458
jcf7180007739860.g6263	501	XP_027098429.1_protein_PHYTOCHROME_KINASE_SUBSTRATE_1-like_[Coffea_arabica]	499	58974	507	0	545		CDP00326.1	447	54.257	505	1.7e-166	482
jcf7180007739888.g6272	867	XP_027072768.1_ER_membrane_protein_complex_subunit_1_[Coffea_arabica]	987	78431	867	0	1419		CDP15321.1	987	78.547	867	0	1420
jcf7180007739901.g6274	351	XP_027062174.1_pentatricopeptide_repeat-containing_protein_At3g59040-like_[Coffea_arabica]	558	76923	338	0	557		CDP16060.1	558	76.246	341	0	553
jcf7180007739903.g6275	643	XP_027114766.1_topless-related_protein_3-like_isoform_X1_[Coffea_arabica]	1132	91352	636	0	1233		CDP17223.1	1132	91.352	636	0	1235
jcf7180007739912.g6278	782	XP_027071017.1_cation/H(+)_antiporter_14_[Coffea_arabica]	810	51966	712	0	743		CDP09258.1	810	51.448	725	0	748
jcf7180007739924.g6279	451	XP_027125360.1_dolichyl-diphosphooligosaccharide--protein_glycosyltransferase_subunit_STT3B_[Coffea_arabica]	732	91556	450	0	858		CDO98566.1	725	91.333	450	0	857
jcf7180007739947.g6282	530	XP_027091583.1_polyadenylate-binding_protein_2-like_[Coffea_arabica]	658	86742	528	0	904		CDP01307.1	658	86.742	528	0	904
jcf7180007739955.g6283	726	XP_027113481.1_putative_ABC_transporter_C_family_member_15_[Coffea_arabica]	1508	75000	704	0	1095		CDP09357.1	1508	74.574	704	0	1071
jcf7180007739969.g6285	721	XP_027064342.1_centromere/kinetochore_protein_zw10_homolog_isoform_X1_[Coffea_arabica]	768	68668	766	0	1018		CDP20774.1	766	68.668	766	0	1019
jcf7180007740007.g6288	2335	XP_027126302.1_LOW_QUALITY_PROTEIN:_midasin-like_[Coffea_arabica]	5382	59816	2389	0	2821		CDO97871.1	5476	61.567	2386	0	2927
jcf7180007740021.g6292	445	XP_027117411.1_uncharacterized_protein_LOC113734862_[Coffea_arabica]	445	76457	446	0	703		CDP10040.1	445	76.009	446	0	702
jcf7180007740023.g6293	836	XP_027126682.1_LRR_receptor-like_serine/threonine-protein_kinase_isoform_X1_[Coffea_arabica]	1124	78868	866	0	1255		CDP16952.1	1124	78.753	866	0	1245
jcf7180007740116.g6302	500	XP_027076101.1_CDK5RAP1-like_protein_[Coffea_arabica]	643	89379	499	0	942		CDP01958.1	643	89.379	499	0	942
jcf7180007740148.g6307	380	XP_027115804.1_CBL-interacting_serine/threonine-protein_kinase_1-like_[Coffea_arabica]	434	80541	370	0	611		CDO98693.1	435	80.323	371	0	607
jcf7180007740192.g6315	382	XP_027125697.1_mannosyl-oligosaccharide_1,2-alpha-mannosidase_MNS1-like_[Coffea_arabica]	584	67241	464	0	596		CDO97750.1	584	66.81	464	0	591
jcf7180007740216.g6319	733	XP_027087682.1_eukaryotic_translation_initiation_factor_3_subunit_C_[Coffea_arabica]	925	84521	730	0	1215		CDP18213.1	925	84.521	730	0	1215
jcf7180007740223.g6320	377	XP_027068301.1_1,4-alpha-glucan-branching_enzyme_2-2,_chloroplastic/amyloplastic-like_isoform_X1_[Coffea_arabica]	866	92113	355	0	708		CDP15378.1	868	91.597	357	0	703
jcf7180007740283.g6324	419	XP_027096916.1_nucleolar_protein_14_isoform_X2_[Coffea_arabica]	803	65802	424	0	529		CDP00465.1	906	65.802	424	2.5e-179	527
jcf7180007740310.g6327	534	XP_027068059.1_TBCC_domain-containing_protein_1-like_isoform_X1_[Coffea_arabica]	595	70397	554	0	750		CDP20019.1	590	70.652	552	0	751
jcf7180007740372.g6333	700	XP_027097273.1_DExH-box_ATP-dependent_RNA_helicase_DExH5,_mitochondrial_[Coffea_arabica]	1197	82906	702	0	1229		CDP00702.1	1167	83.333	702	0	1236
jcf7180007740416.g6337	804	XP_027126273.1_pentatricopeptide_repeat-containing_protein_At3g47530_[Coffea_arabica]	633	67157	612	0	837		CDP12301.1	633	67.157	612	0	837
jcf7180007740429.g6341	502	XP_027101257.1_BUD13_homolog_[Coffea_arabica]	574	63796	511	0	585		CDP16792.1	574	63.796	511	0	585
jcf7180007740437.g6345	697	XP_027113304.1_DExH-box_ATP-dependent_RNA_helicase_DExH9_isoform_X1_[Coffea_arabica]	995	87294	669	0	1194		CDO97651.1	997	87.294	669	0	1190
jcf7180007740472.g6350	561	XP_027121321.1_pentatricopeptide_repeat-containing_protein_At3g22670,_mitochondrial-like_[Coffea_arabica]	574	61364	572	0	709		CDO99090.1	574	61.189	572	0	708
jcf7180007740476.g6351	408	XP_027112681.1_pyruvate_kinase_isozyme_A,_chloroplastic-like_[Coffea_arabica]	586	72180	399	0	586		CDO97309.1	586	72.18	399	0	585
jcf7180007740514.g6352	588	XP_027099916.1_protein_SIEVE_ELEMENT_OCCLUSION_C-like_[Coffea_arabica]	686	54675	631	0	681		CDP13256.1	664	56.65	609	0	684
jcf7180007740514.g6353	788	XP_027099834.1_protein_SIEVE_ELEMENT_OCCLUSION_B-like_[Coffea_arabica]	821	75204	734	0	1159		CDP13257.1	812	74.18	732	0	1136
jcf7180007740625.g6370	548	XP_027075459.1_F-box_protein_SKIP2-like_[Coffea_arabica]	548	82143	532	0	834		CDP02535.1	548	82.143	532	0	834
jcf7180007740652.g6376	967	XP_027066643.1_putative_pentatricopeptide_repeat-containing_protein_At5g06400,_mitochondrial_[Coffea_arabica]	1050	62192	1013	0	1271		CDP10570.1	1050	62.29	1013	0	1273
jcf7180007740656.g6377	296	XP_027093372.1_calcium-transporting_ATPase_3,_endoplasmic_reticulum-type-like_isoform_X1_[Coffea_arabica]	1000	92123	292	0	553		CDP01269.1	1000	91.438	292	0	546
jcf7180007740725.g6382	629	XP_027102114.1_protein_AUXIN_SIGNALING_F-BOX_2-like_[Coffea_arabica]	579	56822	535	0	637		CDO99639.1	588	84.79	572	0	1020
jcf7180007740763.g6389	450	XP_027076497.1_tubulin_alpha_chain_[Coffea_arabica]	449	99332	449	0	931		CDP02221.1	449	99.332	449	0	931
jcf7180007740785.g6390	633	XP_027067067.1_carbon_catabolite_repressor_protein_4_homolog_2-like_[Coffea_arabica]	601	86429	560	0	965		CDP10171.1	607	85.336	566	0	957
jcf7180007740790.g6391	551	XP_027109505.1_cation/calcium_exchanger_5-like_[Coffea_arabica]	567	78788	528	0	763		CDP15537.1	430	83.797	395	0	619
jcf7180007740794.g6392	413	XP_027104972.1_dolichyl-diphosphooligosaccharide--protein_glycosyltransferase_subunit_1B_[Coffea_arabica]	496	76093	389	0	621		CDO99750.1	475	76.864	389	0	625
jcf7180007740841.g6397	534	XP_027076757.1_UPF0481_protein_At3g47200-like_[Coffea_arabica]	538	80483	538	0	897		CDP02532.1	538	80.297	538	0	897
jcf7180007740899.g6403	397	XP_027072612.1_enolase_[Coffea_arabica]	444	75056	445	0	637		CDP15353.1	444	75.056	445	0	637
jcf7180007740908.g6407	451	XP_027080709.1_shikimate_O-hydroxycinnamoyltransferase-like_[Coffea_arabica]	443	73469	441	0	699		CDP19817.1	443	73.243	441	0	696
jcf7180007741031.g6415	321	XP_027092297.1_auxin_transporter-like_protein_3_isoform_X1_[Coffea_arabica]	466	92744	317	0	600		CDO96935.1	501	86.293	321	0	583
jcf7180007741044.g6420	339	XP_027112668.1_probable_zinc_metallopeptidase_EGY3,_chloroplastic_[Coffea_arabica]	596	89877	326	0	600		CDO97302.1	456	88.923	325	0	589
jcf7180007741083.g6427	362	XP_027099892.1_AP-1_complex_subunit_mu-2_[Coffea_arabica]	428	94930	355	0	712		CDP13203.1	428	94.93	355	0	712
jcf7180007741089.g6428	502	XP_027112742.1_K(+)_efflux_antiporter_3,_chloroplastic-like_isoform_X3_[Coffea_arabica]	647	74950	503	0	713		CDO97344.1	737	84.375	416	0	674
jcf7180007741092.g6429	448	XP_027112264.1_BTB/POZ_domain-containing_protein_At3g05675-like_isoform_X1_[Coffea_arabica]	507	74005	427	0	616		CDO97055.1	158	85.714	70	9.41e-36	130
jcf7180007741141.g6432	335	XP_027064311.1_EH_domain-containing_protein_1_isoform_X2_[Coffea_arabica]	545	94444	306	0	615		CDP13787.1	545	94.444	306	0	615
jcf7180007741155.g6433	309	XP_027078722.1_heptahelical_transmembrane_protein_4-like_[Coffea_arabica]	414	85761	309	0	562		CDP02615.1	414	85.761	309	0	544
jcf7180007741196.g6436	897	XP_027119170.1_uncharacterized_protein_LOC113736417_[Coffea_arabica]	1158	48140	941	0	721		CDO98931.1	1158	47.974	938	0	718
jcf7180007741222.g6438	488	XP_027116447.1_TNF_receptor-associated_factor_homolog_1a-like_[Coffea_arabica]	1140	65263	475	0	623		CDO99180.1	1140	65.053	475	0	620
jcf7180007741237.g6440	569	XP_027118845.1_long-chain-alcohol_oxidase_FAO1-like_[Coffea_arabica]	749	80844	569	0	955		CDO99261.1	749	80.844	569	0	949
jcf7180007741259.g6443	513	XP_027105074.1_(3S,6E)-nerolidol_synthase_1-like_[Coffea_arabica]	572	61673	514	0	654		CDO99690.1	605	62.598	508	0	656
jcf7180007741291.g6446	336	XP_027091361.1_metal_transporter_Nramp2-like_[Coffea_arabica]	543	87202	336	0	589		CDP01235.1	546	87.5	336	0	588
jcf7180007741308.g6452	612	XP_027103560.1_phosphatidylinositol_4-kinase_gamma_3-like_[Coffea_arabica]	594	72204	608	0	890		CDP05067.1	576	70.724	608	0	859
jcf7180007741327.g6455	297	XP_027062281.1_peroxisomal_2,4-dienoyl-CoA_reductase-like_[Coffea_arabica]	297	87542	297	0	541		CDP13568.1	297	87.542	297	0	540
jcf7180007741389.g6465	1448	XP_027112985.1_uncharacterized_protein_LOC113731760_isoform_X2_[Coffea_arabica]	1475	62814	1471	0	1676		CDP09497.1	1353	60.88	1296	0	1408
jcf7180007741395.g6468	650	XP_027114644.1_protein_KINESIN_LIGHT_CHAIN-RELATED_1-like_[Coffea_arabica]	640	75154	648	0	982		CDP03732.1	640	74.846	648	0	976
jcf7180007741554.g6485	650	XP_027082131.1_uncharacterized_protein_LOC113704404_[Coffea_arabica]	655	78082	657	0	953		CDP09704.1	668	76.56	657	0	922
jcf7180007741627.g6493	1004	XP_027084673.1_CHD3-type_chromatin-remodeling_factor_PICKLE_[Coffea_arabica]	1493	45130	729	0	602		CDP11272.1	2206	73.153	961	0	1396
jcf7180007741650.g6497	387	XP_027091477.1_nucleobase-ascorbate_transporter_3-like_isoform_X2_[Coffea_arabica]	498	78750	400	0	605		CDP07610.1	547	78.75	400	0	603
jcf7180007741692.g6502	1096	XP_027105382.1_homeobox-DDT_domain_protein_RLT1_isoform_X2_[Coffea_arabica]	1663	47461	965	0	807		CDO99492.1	1510	47.461	965	0	803
jcf7180007741721.g6504	569	XP_027085095.1_protein_NUCLEAR_FUSION_DEFECTIVE_4-like_[Coffea_arabica]	590	60901	555	0	706		CDP07039.1	593	61.111	558	0	704
jcf7180007741724.g6509	614	XP_027111981.1_uncharacterized_protein_LOC113731105_[Coffea_arabica]	688	65745	651	0	860		CDO96876.1	688	66.156	653	0	857
jcf7180007741732.g6510	407	XP_027087512.1_LOW_QUALITY_PROTEIN:_tonoplast_dicarboxylate_transporter-like_[Coffea_arabica]	557	81500	400	0	648		CDP04488.1	476	87.009	331	0	580
jcf7180007741801.g6517	701	XP_027091204.1_exocyst_complex_component_EXO70A1-like_[Coffea_arabica]	723	75252	695	0	1092		CDP01273.1	694	74.822	703	0	1088
jcf7180007741804.g6519	572	XP_027064460.1_G-type_lectin_S-receptor-like_serine/threonine-protein_kinase_SD2-5_[Coffea_arabica]	836	69258	566	0	795		CDP15997.1	836	69.258	566	0	792
jcf7180007741907.g6525	490	XP_027105284.1_L-type_lectin-domain_containing_receptor_kinase_VII.1-like_[Coffea_arabica]	682	77632	456	0	746		CDO99535.1	682	77.632	456	0	746
jcf7180007741933.g6526	402	XP_027086158.1_cytochrome_b561_and_DOMON_domain-containing_protein_At4g17280-like_[Coffea_arabica]	401	68382	408	0	581		CDP04497.1	406	67.07	413	0	572
jcf7180007741962.g6536	890	XP_027125665.1_receptor-like_protein_EIX2_[Coffea_arabica]	927	66080	852	0	1083		CDO98515.1	788	59.346	765	0	822
jcf7180007742006.g6548	281	XP_027085201.1_aspartate_aminotransferase,_cytoplasmic-like_[Coffea_arabica]	482	93455	275	0	543		CDP16161.1	420	92.727	275	0	539
jcf7180007742039.g6551	570	XP_027063740.1_uncharacterized_protein_LOC113690116_[Coffea_arabica]	492	82245	490	0	878		CDP14414.1	572	82.867	572	0	1024
jcf7180007742151.g6570	354	XP_027062393.1_LOW_QUALITY_PROTEIN:_tryptophan_synthase_beta_chain_2,_chloroplastic-like_[Coffea_arabica]	408	89548	354	0	662		CDP05778.1	466	91.243	354	0	666
jcf7180007742176.g6571	729	XP_027066661.1_beta-galactosidase-like_[Coffea_arabica]	724	80360	723	0	1254		CDO97918.1	835	69.857	700	0	1041
jcf7180007742207.g6575	1117	XP_027081226.1_formin-like_protein_14_isoform_X2_[Coffea_arabica]	1253	82752	516	0	916		CDP07150.1	1241	85.626	487	0	909
jcf7180007742337.g6586	318	XP_027068669.1_protein_NDL1-like_isoform_X1_[Coffea_arabica]	345	82353	323	0	546		CDP03191.1	345	82.353	323	0	546
jcf7180007742354.g6591	2289	XP_027092282.1_acetyl-CoA_carboxylase_1-like_isoform_X1_[Coffea_arabica]	2271	87560	2291	0	4140		CDP01191.1	2274	87.598	2290	0	4140
jcf7180007742445.g6595	451	XP_027126738.1_probable_galacturonosyltransferase_11_[Coffea_arabica]	537	87805	451	0	826		CDP12269.1	537	87.805	451	0	825
jcf7180007742469.g6606	496	XP_027101023.1_sulfite_reductase_1_[ferredoxin],_chloroplastic-like_[Coffea_arabica]	712	92784	291	0	576		CDP14606.1	712	92.784	291	0	576
jcf7180007742471.g6608	605	XP_027114794.1_uncharacterized_protein_LOC113732936_isoform_X1_[Coffea_arabica]	560	56182	550	0	599		CDP18223.1	583	56	550	0	593
jcf7180007742474.g6609	873	XP_027078452.1_nucleolin-like_[Coffea_arabica]	836	59102	846	0	844		CDP01918.1	836	59.011	849	0	851
jcf7180007742532.g6619	1179	XP_027107084.1_RNA_helicase_aquarius-like_[Coffea_arabica]	1558	83939	1183	0	2058		CDP17532.1	1558	84.193	1183	0	2062
jcf7180007742621.g6633	950	XP_027096236.1_receptor-like_protein_EIX1_[Coffea_arabica]	961	55089	953	0	908		CDP16280.1	1035	49.898	980	0	836
jcf7180007742773.g6659	467	XP_027124522.1_protein_DETOXIFICATION_16-like_isoform_X2_[Coffea_arabica]	495	71285	498	0	699		CDO98390.1	495	71.084	498	0	698
jcf7180007742780.g6661	1036	XP_027081150.1_DNA-directed_RNA_polymerases_IV_and_V_subunit_2-like_[Coffea_arabica]	1205	79646	1017	0	1724		CDP09677.1	1213	77.019	1040	0	1704
jcf7180007742867.g6665	803	XP_027088729.1_probable_beta-D-xylosidase_5_[Coffea_arabica]	810	65304	807	0	1107		CDP06334.1	781	62.949	807	0	1053
jcf7180007742903.g6668	548	XP_027090472.1_cyclic_nucleotide-gated_ion_channel_18-like_[Coffea_arabica]	708	81353	547	0	924		CDP20056.1	708	78.86	544	0	880
jcf7180007743022.g6688	695	XP_027093935.1_pentatricopeptide_repeat-containing_protein_At3g26540-like_[Coffea_arabica]	708	71839	696	0	1071		CDP11975.1	708	71.695	696	0	1068
jcf7180007743033.g6689	752	XP_027091527.1_probable_LRR_receptor-like_serine/threonine-protein_kinase_At1g06840_isoform_X2_[Coffea_arabica]	877	81673	753	0	1232		CDP04034.1	955	80.397	755	0	1209
jcf7180007743038.g6690	954	XP_027112371.1_extra-large_guanine_nucleotide-binding_protein_1-like_[Coffea_arabica]	917	63202	962	0	1159		CDO97112.1	886	62.435	961	0	1143
jcf7180007743039.g6692	1580	XP_027076880.1_putative_late_blight_resistance_protein_homolog_R1A-3_[Coffea_arabica]	1254	43028	1090	0	774		CDP08428.1	1275	42.832	1130	0	765
jcf7180007743054.g6693	477	XP_027109910.1_autophagy-related_protein_13a-like_[Coffea_arabica]	611	64444	495	0	550		CDP04963.1	611	64.444	495	0	551
jcf7180007743195.g6709	983	XP_027127507.1_probable_LRR_receptor-like_serine/threonine-protein_kinase_At3g47570_[Coffea_arabica]	1056	54113	1009	0	980		CDP21284.1	1027	53.32	1009	0	950
jcf7180007743295.g6722	444	XP_027110902.1_protein_DA1-related_2_isoform_X3_[Coffea_arabica]	502	77477	444	0	666		CDP00150.1	501	77.477	444	0	666
jcf7180007743317.g6724	395	XP_027099367.1_protein_DETOXIFICATION_12-like_[Coffea_arabica]	478	78481	395	0	632		CDP00710.1	478	78.571	392	0	628
jcf7180007743340.g6727	883	XP_027094064.1_LOW_QUALITY_PROTEIN:_pentatricopeptide_repeat-containing_protein_At1g19720-like_[Coffea_arabica]	844	70546	842	0	1233		CDP07464.1	788	69.797	788	0	1140
jcf7180007743359.g6729	425	XP_027081022.1_ACT_domain-containing_protein_ACR2-like_[Coffea_arabica]	530	67048	437	0	541		CDP13538.1	494	66.59	434	0	538
jcf7180007743456.g6750	341	XP_027064452.1_chitin_elicitor_receptor_kinase_1-like_[Coffea_arabica]	631	89583	336	0	623		CDP11343.1	608	89.583	336	0	623
jcf7180007743485.g6755	388	XP_027085472.1_uncharacterized_protein_LOC113707376_[Coffea_arabica]	568	62143	420	0	531		CDP18809.1	568	61.905	420	0	529
jcf7180007743666.g6767	692	XP_027120996.1_probable_serine/threonine-protein_kinase_DDB_G0282963_[Coffea_arabica]	790	74203	690	0	975		CDO98758.1	811	72.011	711	0	962
jcf7180007743708.g6774	631	XP_027071470.1_probable_LRR_receptor-like_serine/threonine-protein_kinase_At1g67720_[Coffea_arabica]	930	77321	657	0	1055		CDP06699.1	935	77.321	657	0	1048
jcf7180007743740.g6775	742	XP_027082654.1_uncharacterized_protein_LOC113704989_[Coffea_arabica]	1524	72838	740	0	1090		CDP09846.1	729	66.216	740	0	993
jcf7180007743741.g6776	1223	XP_027062020.1_receptor-like_protein_kinase_BRI1-like_3_[Coffea_arabica]	1225	81915	1222	0	1905		CDP13631.1	1225	81.506	1222	0	1898
jcf7180007743876.g6790	535	XP_027090622.1_LOW_QUALITY_PROTEIN:_pentatricopeptide_repeat-containing_protein_At3g14730-like_[Coffea_arabica]	641	72788	452	0	682		CDP11486.1	576	71.584	461	0	672
jcf7180007743968.g6797	773	XP_027068641.1_VIN3-like_protein_1_isoform_X2_[Coffea_arabica]	724	84011	713	0	1246		CDP03364.1	682	78.541	713	0	1138
jcf7180007743979.g6799	884	XP_027123685.1_pentatricopeptide_repeat-containing_protein_At5g65560-like_[Coffea_arabica]	920	65184	899	0	1216		CDP12725.1	767	66.397	741	0	1028
jcf7180007743982.g6800	544	XP_027072946.1_calmodulin-interacting_protein_111-like_isoform_X1_[Coffea_arabica]	1015	78707	526	0	835		CDP06224.1	996	79.278	526	0	821
jcf7180007744045.g6803	403	XP_027100171.1_uncharacterized_protein_LOC113719221_[Coffea_arabica]	407	73902	410	0	577		CDP00662.1	406	74.146	410	0	572
jcf7180007744045.g6804	419	XP_027076379.1_putative_glutamine_amidotransferase_GAT1_2.1_[Coffea_arabica]	425	74584	421	0	681		CDP02753.1	425	74.822	421	0	683
jcf7180007744062.g6805	509	XP_027086825.1_uncharacterized_protein_At4g19900-like_[Coffea_arabica]	683	70229	524	0	688		CDP11246.1	669	70.039	514	0	688
jcf7180007744067.g6806	1036	XP_027109594.1_ATP-dependent_helicase_BRM-like_[Coffea_arabica]	1471	73642	994	0	1370		CDP08793.1	2223	74.496	992	0	1343
jcf7180007744083.g6808	526	XP_027070545.1_nodulation-signaling_pathway_2_protein-like_[Coffea_arabica]	563	59813	535	0	631		CDP06443.1	563	59.626	535	0	630
jcf7180007744147.g6814	495	XP_027081514.1_uncharacterized_protein_LOC113704073_isoform_X2_[Coffea_arabica]	466	71831	497	0	680		CDP09968.1	466	71.831	497	0	680
jcf7180007744172.g6817	470	XP_027112087.1_F-box/LRR-repeat_protein_3-like_isoform_X2_[Coffea_arabica]	709	72273	440	0	636		CDP04080.1	655	70.759	448	0	624
jcf7180007744293.g6828	588	XP_027120809.1_probable_inactive_DNA_(cytosine-5)-methyltransferase_DRM3_[Coffea_arabica]	831	54762	588	0	628		CDO98719.1	753	54.685	587	0	620
jcf7180007744316.g6831	541	XP_027080058.1_uncharacterized_protein_LOC113703042_isoform_X4_[Coffea_arabica]	3505	65720	528	0	711		CDP13428.1	4320	65.72	528	0	711
jcf7180007744371.g6842	364	XP_027113263.1_shaggy-related_protein_kinase_kappa_[Coffea_arabica]	423	96328	354	0	714		CDP15204.1	409	74.23	357	0	549
jcf7180007744379.g6844	521	XP_027112719.1_squalene_monooxygenase-like_[Coffea_arabica]	538	68750	528	0	726		CDO97332.1	535	67.992	528	0	713
jcf7180007744473.g6852	575	XP_027091455.1_scarecrow-like_protein_1_[Coffea_arabica]	611	77296	577	0	885		CDP11991.1	569	77.123	577	0	879
jcf7180007744477.g6853	468	XP_027104619.1_cysteine_desulfurase_1,_chloroplastic-like_isoform_X1_[Coffea_arabica]	487	75254	493	0	741		CDO99993.1	481	75.975	487	0	739
jcf7180007744528.g6857	381	XP_027061280.1_transcriptional_regulator_STERILE_APETALA_[Coffea_arabica]	453	74211	380	0	581		CDP20107.1	410	74.278	381	0	580
jcf7180007744535.g6859	411	XP_027098999.1_putative_GTP_diphosphokinase_RSH1,_chloroplastic_isoform_X2_[Coffea_arabica]	891	75000	440	0	669		CDP17106.1	884	75.455	440	0	671
jcf7180007744565.g6862	452	XP_027082687.1_probable_inactive_receptor_kinase_At4g23740,_partial_[Coffea_arabica]	613	78118	425	0	612		CDP12117.1	635	77.882	425	0	609
jcf7180007744634.g6879	550	XP_027088850.1_uncharacterized_protein_LOC113710189_[Coffea_arabica]	571	70974	534	0	828		CDP04277.1	571	70.787	534	0	827
jcf7180007744705.g6891	577	XP_027110480.1_protein_NRT1/_PTR_FAMILY_8.2-like_[Coffea_arabica]	571	77700	574	0	938		CDP09153.1	618	77.352	574	0	931
jcf7180007744732.g6896	661	XP_027109603.1_uncharacterized_protein_LOC113729511_[Coffea_arabica]	488	76279	430	0	703		CDP09121.1	584	75.406	431	0	697
jcf7180007744969.g6937	562	XP_027096507.1_RNA-binding_KH_domain-containing_protein_RCF3_isoform_X1_[Coffea_arabica]	536	73881	536	0	778		CDP00355.1	536	74.067	536	0	780
jcf7180007744984.g6939	650	XP_027114850.1_protein_LONGIFOLIA_1-like_isoform_X1_[Coffea_arabica]	813	63003	646	0	674		CDP21388.1	813	63.003	646	0	674
jcf7180007745067.g6944	694	XP_027070415.1_zinc_finger_BED_domain-containing_protein_DAYSLEEPER-like_[Coffea_arabica]	731	85673	684	0	1208		CDP10447.1	485	85.773	485	0	812
jcf7180007745142.g6947	514	XP_027116476.1_uncharacterized_protein_LOC113734247_[Coffea_arabica]	612	76346	520	0	798		CDO99191.1	596	74.808	520	0	775
jcf7180007745171.g6948	334	XP_027114936.1_probable_receptor-like_protein_kinase_At2g42960_isoform_X2_[Coffea_arabica]	509	88252	349	0	627		CDP15187.1	509	89.112	349	0	636
jcf7180007745214.g6949	705	XP_027086413.1_WD_repeat-containing_protein_44-like_[Coffea_arabica]	924	63374	658	0	820		CDP11271.1	924	63.526	658	0	820
jcf7180007745226.g6951	587	XP_027076553.1_pentatricopeptide_repeat-containing_protein_At2g21090-like_[Coffea_arabica]	602	70698	587	0	868		CDP13155.1	602	70.869	587	0	872
jcf7180007745243.g6953	1391	XP_027126612.1_uncharacterized_protein_LOC113742819_isoform_X1_[Coffea_arabica]	1458	59159	1332	0	1363		CDO97814.1	1372	56.724	1331	0	1281
jcf7180007745259.g6957	397	XP_027113436.1_probable_serine/threonine-protein_kinase_PBL19_[Coffea_arabica]	436	80977	389	0	658		CDP09392.1	436	80.977	389	0	659
jcf7180007745395.g6967	407	XP_027069975.1_fructose-bisphosphate_aldolase_6,_cytosolic_[Coffea_arabica]	358	92128	343	0	647		CDP15370.1	358	93.003	343	0	656
jcf7180007745401.g6968	571	XP_027080708.1_two-component_response_regulator-like_APRR2_isoform_X6_[Coffea_arabica]	557	70629	572	0	776		CDP12959.1	553	70.578	571	0	778
jcf7180007745483.g6974	952	XP_027082917.1_receptor_protein_kinase_TMK1-like_[Coffea_arabica]	966	73312	948	0	1379		CDP06852.1	918	70.464	948	0	1338
jcf7180007745518.g6978	497	XP_027117035.1_AAA-ATPase_At3g50940-like_[Coffea_arabica]	551	58386	471	0	564		CDO97027.1	498	79.388	490	0	806
jcf7180007745571.g6981	347	XP_027095640.1_erlin-1-like_[Coffea_arabica]	363	86164	318	0	585		CDP00430.1	363	86.164	318	0	585
jcf7180007745593.g6984	611	XP_027075456.1_autophagy-related_protein_13b-like_isoform_X1_[Coffea_arabica]	647	75429	525	0	642		CDP12782.1	649	74.763	527	0	637
jcf7180007745610.g6988	327	XP_027085054.1_LOW_QUALITY_PROTEIN:_SPX_domain-containing_membrane_protein_At4g22990-like_[Coffea_arabica]	696	71240	379	0	524		CDP09820.1	695	71.693	378	0	527
jcf7180007745675.g6990	467	XP_027064394.1_L-ascorbate_oxidase_homolog_[Coffea_arabica]	545	89738	458	0	868		CDP10787.1	541	89.301	458	0	864
jcf7180007745686.g6995	508	XP_027062984.1_protein_FAR-RED_IMPAIRED_RESPONSE_1-like_[Coffea_arabica]	692	67521	468	0	677		CDP17275.1	335	41.143	175	5e-39	145
jcf7180007745739.g6999	599	XP_027096596.1_protein_NSP-INTERACTING_KINASE_1_[Coffea_arabica]	623	84751	623	0	1073		CDP00520.1	623	84.591	623	0	1072
jcf7180007745784.g7005	448	XP_027084717.1_protein_IQ-DOMAIN_1-like_[Coffea_arabica]	453	82637	455	0	651		CDP08282.1	453	82.637	455	0	651
jcf7180007745786.g7006	362	XP_027064702.1_uncharacterized_protein_LOC113690826_[Coffea_arabica]	373	87603	363	0	665		CDP13344.1	270	66.308	279	4.06e-131	380
jcf7180007745799.g7008	736	XP_027068250.1_kinesin-like_protein_KIN-13B_[Coffea_arabica]	767	73343	709	0	935		CDP03338.1	767	73.625	709	0	937
jcf7180007745893.g7015	287	XP_027087042.1_pyrophosphate--fructose_6-phosphate_1-phosphotransferase_subunit_beta-like_[Coffea_arabica]	563	90714	280	0	533		CDP04453.1	563	90.357	280	0	531
jcf7180007745930.g7018	805	XP_027077059.1_G-type_lectin_S-receptor-like_serine/threonine-protein_kinase_RLK1_[Coffea_arabica]	803	66047	807	0	1077		CDP14422.1	797	65.799	807	0	1069
jcf7180007745958.g7026	923	XP_027116049.1_uncharacterized_protein_LOC113733987_isoform_X3_[Coffea_arabica]	1456	53390	944	0	790		CDO98886.1	1677	53.39	944	0	790
jcf7180007745960.g7027	919	XP_027093974.1_phosphatidate_phosphatase_PAH2-like_isoform_X2_[Coffea_arabica]	940	50608	658	0	559		CDP01352.1	362	73.057	193	1.61e-80	267
jcf7180007745997.g7032	874	XP_027117230.1_clathrin_interactor_EPSIN_2-like_isoform_X7_[Coffea_arabica]	925	61130	903	0	808		CDP14667.1	924	61.13	903	0	797
jcf7180007746016.g7033	902	XP_027089705.1_receptor_kinase-like_protein_Xa21_[Coffea_arabica]	1209	55901	966	0	951		CDP00866.1	1208	59.364	817	0	883
jcf7180007746133.g7044	449	XP_027102460.1_tubulin_alpha-3_chain_[Coffea_arabica]	449	97773	449	0	919		CDP17586.1	449	97.773	449	0	919
jcf7180007746141.g7047	584	XP_027106157.1_oligopeptide_transporter_4-like_[Coffea_arabica]	744	87800	541	0	1008		CDP19592.1	707	71.609	553	0	825
jcf7180007746186.g7051	421	XP_027085564.1_protein_ALP1-like_[Coffea_arabica]	513	88551	428	0	785		CDP08295.1	513	88.551	428	0	786
jcf7180007746240.g7054	384	XP_027069565.1_glucan_endo-1,3-beta-glucosidase_8-like_[Coffea_arabica]	480	83880	366	0	636		CDP18694.1	480	83.607	366	0	633
jcf7180007746268.g7059	522	XP_027069527.1_glucan_endo-1,3-beta-glucosidase_8-like_[Coffea_arabica]	503	58654	520	0	612		CDP18693.1	503	57.885	520	0	607
jcf7180007746288.g7061	668	XP_027112752.1_transcription_factor_GTE7-like_[Coffea_arabica]	587	78276	557	0	762		CDO97354.1	587	78.815	557	0	766
jcf7180007746326.g7063	443	XP_027104774.1_hippocampus_abundant_transcript-like_protein_1_[Coffea_arabica]	443	77652	443	0	691		CDP20482.1	441	77.778	441	0	686
jcf7180007746397.g7073	584	XP_027115691.1_pyruvate_decarboxylase_2-like_[Coffea_arabica]	610	82601	569	0	964		CDO99368.1	610	82.601	569	0	964
jcf7180007746562.g7093	620	XP_027102176.1_LOW_QUALITY_PROTEIN:_CRM-domain_containing_factor_CFM2,_chloroplastic-like_[Coffea_arabica]	972	63787	544	0	671		CDP02160.1	1034	63.321	548	0	676
jcf7180007746697.g7108	750	XP_027087139.1_receptor-like_protein_CLAVATA2_[Coffea_arabica]	751	74734	752	0	1012		CDP04223.1	751	74.601	752	0	1011
jcf7180007746712.g7110	620	XP_027106779.1_pentatricopeptide_repeat-containing_protein_At1g08070,_chloroplastic-like_[Coffea_arabica]	612	64463	605	0	814		CDP09312.1	618	64.132	605	0	805
jcf7180007746897.g7131	558	XP_027069135.1_pentatricopeptide_repeat-containing_protein_At5g02830,_chloroplastic_isoform_X1_[Coffea_arabica]	858	69737	532	0	745		CDP06691.1	853	69.549	532	0	744
jcf7180007746958.g7145	629	XP_027074536.1_succinate_dehydrogenase_[ubiquinone]_flavoprotein_subunit,_mitochondrial_[Coffea_arabica]	632	93354	632	0	1207		CDP02029.1	632	93.354	632	0	1207
jcf7180007747029.g7154	432	XP_027068042.1_ubiquitin_carboxyl-terminal_hydrolase_12_isoform_X1_[Coffea_arabica]	1124	95024	422	0	838		CDP10548.1	1123	95.261	422	0	840
jcf7180007747059.g7156	325	XP_027077828.1_probable_trehalose-phosphate_phosphatase_J_[Coffea_arabica]	388	83278	299	0	518		CDP01436.1	379	82.274	299	0	508
jcf7180007747060.g7157	709	XP_027123134.1_protein_KINESIN_LIGHT_CHAIN-RELATED_3-like_[Coffea_arabica]	742	79515	742	0	1141		CDP12398.1	704	76.216	740	0	1074
jcf7180007747115.g7164	370	XP_027112324.1_UPF0496_protein_At4g34320-like_[Coffea_arabica]	370	87568	370	0	638		CDO97084.1	370	87.838	370	0	641
jcf7180007747182.g7169	618	XP_027078929.1_ribonucleoside-diphosphate_reductase_large_subunit_isoform_X1_[Coffea_arabica]	808	87656	640	0	1191		CDP12851.1	808	87.656	640	0	1190
jcf7180007747252.g7174	555	XP_027094213.1_uncharacterized_protein_LOC113714524_[Coffea_arabica]	571	73256	516	0	809		CDP03796.1	605	73.643	516	0	810
jcf7180007747290.g7176	576	XP_027067975.1_digalactosyldiacylglycerol_synthase_1,_chloroplastic-like_isoform_X2_[Coffea_arabica]	806	87709	537	0	1013		CDP10599.1	805	87.709	537	0	1013
jcf7180007747306.g7177	434	XP_027095467.1_ATPase_WRNIP1-like_[Coffea_arabica]	607	76082	439	0	677		CDP16879.1	605	76.082	439	0	677
jcf7180007747331.g7179	1343	XP_027108011.1_ABC_transporter_G_family_member_38-like_[Coffea_arabica]	524	67167	466	0	607		CDP15209.1	1424	69.457	1087	0	1499
jcf7180007747352.g7180	437	XP_027079164.1_glycosyltransferase_6-like_[Coffea_arabica]	469	67963	437	0	652		CDP02619.1	469	67.277	437	0	646
jcf7180007747441.g7184	751	XP_027075226.1_BTB/POZ_domain-containing_protein_SR1IP1-like_[Coffea_arabica]	620	73593	693	0	1007		CDP02580.1	620	73.593	693	0	1007
jcf7180007747563.g7188	707	XP_027080363.1_pentatricopeptide_repeat-containing_protein_At3g16610-like_[Coffea_arabica]	810	73082	691	0	1066		CDP13436.1	810	73.082	691	0	1065
jcf7180007747592.g7190	620	XP_027094638.1_long-chain-alcohol_oxidase_FAO2-like_[Coffea_arabica]	763	72569	576	0	890		CDP03771.1	766	72.049	576	0	884
jcf7180007747705.g7202	915	XP_027070925.1_serine/threonine-protein_kinase_D6PKL2-like_[Coffea_arabica]	941	72856	921	0	1352		CDP15386.1	941	72.579	919	0	1342
jcf7180007747733.g7206	428	XP_027109702.1_serine/threonine-protein_kinase_BSK5-like_[Coffea_arabica]	489	86305	387	0	714		CDP09128.1	489	86.305	387	0	714
jcf7180007747749.g7207	515	XP_027085941.1_berberine_bridge_enzyme-like_8_[Coffea_arabica]	532	69320	515	0	729		CDP12594.1	532	69.32	515	0	729
jcf7180007747864.g7214	852	XP_027105339.1_pentatricopeptide_repeat-containing_protein_At5g04780,_mitochondrial-like_[Coffea_arabica]	940	38585	749	0	560		CDP10583.1	630	59.42	621	0	756
jcf7180007747991.g7228	420	XP_027093491.1_probable_LRR_receptor-like_serine/threonine-protein_kinase_At5g48740_[Coffea_arabica]	900	74041	443	0	688		CDP03877.1	900	74.041	443	0	690
jcf7180007748022.g7231	548	XP_027107846.1_ferric_reduction_oxidase_6-like_[Coffea_arabica]	743	74911	562	0	866		CDP17766.1	743	74.911	562	0	866
jcf7180007748043.g7232	906	XP_027085644.1_trafficking_protein_particle_complex_II-specific_subunit_120_homolog_[Coffea_arabica]	1204	82262	902	0	1514		CDP18799.1	1204	82.262	902	0	1514
jcf7180007748047.g7233	735	XP_027065226.1_CRM-domain_containing_factor_CFM3,_chloroplastic/mitochondrial-like_[Coffea_arabica]	942	54580	786	0	763		CDP03154.1	830	57.597	724	0	733
jcf7180007748074.g7234	573	XP_027079307.1_callose_synthase_5-like_[Coffea_arabica]	1893	86022	465	0	847		CDP04693.1	1912	85.806	465	0	843
jcf7180007748082.g7235	790	XP_027077312.1_condensin_complex_subunit_3-like_isoform_X2_[Coffea_arabica]	1036	63136	491	0	632		CDP01644.1	1044	62.753	494	0	625
jcf7180007748108.g7236	502	XP_027114881.1_rhodanese-like_domain-containing_protein_6_[Coffea_arabica]	630	73885	471	0	735		CDP15237.1	630	73.248	471	0	729
jcf7180007748122.g7237	461	XP_027110748.1_inactive_receptor-like_serine/threonine-protein_kinase_At2g40270_isoform_X4_[Coffea_arabica]	623	71193	486	0	638		CDP13981.1	639	77.179	390	0	599
jcf7180007748177.g7239	530	XP_027106613.1_LOW_QUALITY_PROTEIN:_high-affinity_nitrate_transporter_2.1-like_[Coffea_arabica]	530	89057	530	0	1002		CDP07064.1	530	89.434	530	0	1006
jcf7180007748262.g7249	414	XP_027069159.1_ATP-dependent_6-phosphofructokinase_3-like_[Coffea_arabica]	530	80905	398	0	671		CDP03227.1	485	81.156	398	0	671
jcf7180007748370.g7257	898	XP_027061494.1_pentatricopeptide_repeat-containing_protein_At3g06920-like_[Coffea_arabica]	899	79287	898	0	1496		CDP19072.1	899	78.842	898	0	1485
jcf7180007748406.g7259	469	XP_027074010.1_pentatricopeptide_repeat-containing_protein_At2g17670-like_[Coffea_arabica]	466	77612	469	0	744		CDP19984.1	466	77.612	469	0	744
jcf7180007748408.g7260	960	XP_027088444.1_protein_CHROMATIN_REMODELING_4_[Coffea_arabica]	1311	56536	941	0	875		CDP11272.1	2206	58.808	755	0	744
jcf7180007748417.g7261	587	XP_027061789.1_uncharacterized_protein_LOC113688230_[Coffea_arabica]	701	69750	519	0	732		CDP11306.1	695	68.979	519	0	719
jcf7180007748495.g7268	666	XP_027066833.1_acetolactate_synthase_2,_chloroplastic-like_[Coffea_arabica]	679	85606	660	0	1170		CDP07281.1	679	85.455	660	0	1169
jcf7180007748500.g7271	440	XP_027095569.1_protein_LAZY_1-like_isoform_X2_[Coffea_arabica]	410	71845	412	0	556		CDP13369.1	412	70.361	415	0	539
jcf7180007748505.g7272	653	XP_027115261.1_ferric_reduction_oxidase_2-like_[Coffea_arabica]	715	49605	633	0	618		CDP08775.1	715	50.82	610	0	591
jcf7180007748507.g7273	300	XP_027072345.1_serine_acetyltransferase_5-like_[Coffea_arabica]	299	88000	300	0	538		CDO97930.1	292	78.746	287	1.3e-167	471
jcf7180007748548.g7276	545	XP_027113403.1_pentatricopeptide_repeat-containing_protein_At1g02150-like_[Coffea_arabica]	544	74495	545	0	865		CDP09418.1	457	74.891	458	0	734
jcf7180007748573.g7280	493	XP_027112336.1_protein_DETOXIFICATION_33-like_[Coffea_arabica]	514	81557	488	0	827		CDO97089.1	514	81.762	488	0	827
jcf7180007748573.g7281	366	XP_027112334.1_cytochrome_c_biogenesis_protein_CCS1,_chloroplastic-like_[Coffea_arabica]	598	86533	349	0	629		CDO97088.1	598	85.96	349	0	625
jcf7180007748582.g7283	597	XP_027094501.1_probable_rhamnogalacturonate_lyase_B_isoform_X1_[Coffea_arabica]	681	72006	643	0	957		CDP00942.1	681	71.851	643	0	956
jcf7180007748746.g7294	643	XP_027078493.1_pentatricopeptide_repeat-containing_protein_At3g02330,_mitochondrial-like_isoform_X2_[Coffea_arabica]	718	49767	643	0	630		CDP02363.1	881	49.767	643	0	630
jcf7180007748763.g7296	332	XP_027111633.1_tRNA_(adenine(58)-N(1))-methyltransferase_catalytic_subunit_TRMT61A_[Coffea_arabica]	309	78614	332	0	534		CDO99658.1	309	78.614	332	0	534
jcf7180007748799.g7303	347	XP_027098685.1_beta-glucosidase_11-like_isoform_X2_[Coffea_arabica]	526	69364	346	0	532		CDP20841.1	501	68.208	346	0	525
jcf7180007748801.g7304	656	XP_027099267.1_COBRA-like_protein_7_[Coffea_arabica]	660	62720	625	0	813		CDP00738.1	660	61.728	648	0	821
jcf7180007748813.g7305	556	XP_027062013.1_LOW_QUALITY_PROTEIN:_L-ascorbate_oxidase_homolog_[Coffea_arabica]	557	80431	557	0	914		CDP18567.1	557	81.329	557	0	926
jcf7180007748819.g7307	504	XP_027109482.1_uncharacterized_protein_LOC113729378_[Coffea_arabica]	481	81678	453	0	790		CDP15823.1	481	81.579	456	0	792
jcf7180007748819.g7308	848	XP_027065122.1_transcription_factor_GTE4-like_[Coffea_arabica]	815	57435	881	0	786		CDP05984.1	800	57.586	870	0	773
jcf7180007748949.g7321	660	XP_027120705.1_uncharacterized_protein_LOC113737722_[Coffea_arabica]	681	46460	678	0	578		CDP08030.1	637	44.395	678	0	538
jcf7180007748992.g7328	367	XP_027119559.1_F-box_protein_At5g49610-like_isoform_X2_[Coffea_arabica]	384	78736	348	0	578		CDO98732.1	281	58.287	362	1.19e-136	394
jcf7180007749007.g7330	526	XP_027108816.1_protein_NRT1/_PTR_FAMILY_4.5-like_[Coffea_arabica]	604	72621	515	0	750		CDO96897.1	536	72.427	515	0	748
jcf7180007749041.g7332	359	XP_027127640.1_trans-resveratrol_di-O-methyltransferase-like_[Coffea_arabica]	365	72253	364	0	542		CDP15888.1	362	72.753	356	0	536
jcf7180007749055.g7333	558	XP_027103313.1_pectinesterase-like_[Coffea_arabica]	561	69943	529	0	764		CDP21422.1	532	67.108	529	0	702
jcf7180007749112.g7336	405	XP_027094703.1_F-box/kelch-repeat_protein_At1g30090_[Coffea_arabica]	405	86667	405	0	740		CDP15791.1	405	86.667	405	0	740
jcf7180007749135.g7340	1160	XP_027110227.1_uncharacterized_protein_LOC113730019_[Coffea_arabica]	1260	50000	898	0	681		CDP05155.1	1201	49.388	899	0	663
jcf7180007749227.g7346	503	XP_027127092.1_probable_folate-biopterin_transporter_4_[Coffea_arabica]	489	72962	503	0	709		CDP05767.1	489	72.962	503	0	709
jcf7180007749318.g7353	641	XP_027126265.1_diacylglycerol_kinase_1-like_[Coffea_arabica]	732	49513	616	0	605		CDP18396.1	732	49.675	616	0	607
jcf7180007749351.g7355	331	XP_027067290.1_AMP_deaminase-like_isoform_X4_[Coffea_arabica]	859	95770	331	0	658		CDP06462.1	841	95.77	331	0	657
jcf7180007749352.g7356	996	XP_027079601.1_receptor-like_protein_kinase_HSL1_[Coffea_arabica]	1020	71013	928	0	1290		CDP08193.1	984	68.642	928	0	1210
jcf7180007749380.g7357	454	XP_027076701.1_L-ascorbate_oxidase_homolog_[Coffea_arabica]	537	80266	451	0	760		CDP02461.1	539	80.266	451	0	759
jcf7180007749504.g7372	659	XP_027067283.1_cation/calcium_exchanger_4-like_isoform_X1_[Coffea_arabica]	714	65517	667	0	842		CDP03076.1	778	66.063	663	0	812
jcf7180007749572.g7376	342	XP_027094979.1_laccase-14-like_[Coffea_arabica]	562	73591	337	0	521		CDP01133.1	562	72.7	337	0	520
jcf7180007749694.g7387	813	XP_027126647.1_phospholipase_D_alpha_1_[Coffea_arabica]	809	86839	813	0	1483		CDO98145.1	809	86.962	813	0	1488
jcf7180007749698.g7389	539	XP_027120919.1_5'-nucleotidase_domain-containing_protein_4-like_isoform_X4_[Coffea_arabica]	639	82688	439	0	746		CDO98688.1	635	82.46	439	0	745
jcf7180007749799.g7404	620	XP_027063218.1_9-cis-epoxycarotenoid_dioxygenase_NCED1,_chloroplastic-like_[Coffea_arabica]	653	77795	653	0	1030		CDP06103.1	635	79.393	626	0	1021
jcf7180007749815.g7407	394	XP_027089347.1_aspartic_proteinase-like_[Coffea_arabica]	513	81510	384	0	665		CDP04424.1	513	80.99	384	0	660
jcf7180007749899.g7410	615	XP_027103678.1_heat_shock_protein_83-like_[Coffea_arabica]	705	93669	616	0	1088		CDP05141.1	705	93.669	616	0	1088
jcf7180007749944.g7411	496	XP_027068689.1_ectonucleotide_pyrophosphatase/phosphodiesterase_family_member_3_[Coffea_arabica]	496	79158	499	0	800		CDP03171.1	496	78.958	499	0	798
jcf7180007750002.g7414	660	XP_027111661.1_probable_serine/threonine-protein_kinase_abkC_isoform_X1_[Coffea_arabica]	640	74656	655	0	1004		CDO99646.1	640	74.198	655	0	1001
jcf7180007750064.g7418	966	XP_027106580.1_plasma_membrane_ATPase_1-like_isoform_X2_[Coffea_arabica]	967	88095	966	0	1741		CDP09440.1	966	87.992	966	0	1739
jcf7180007750073.g7420	696	XP_027062651.1_protein_argonaute_16-like_[Coffea_arabica]	901	75852	675	0	1053		CDP05690.1	908	76.637	672	0	1059
jcf7180007750074.g7421	1196	XP_027121229.1_mediator_of_RNA_polymerase_II_transcription_subunit_33A-like_[Coffea_arabica]	1327	74595	1236	0	1768		CDO98984.1	1327	74.595	1236	0	1768
jcf7180007750074.g7422	648	XP_027121230.1_pentatricopeptide_repeat-containing_protein_At5g19020,_mitochondrial-like_[Coffea_arabica]	700	64387	702	0	899		CDO98985.1	700	64.387	702	0	899
jcf7180007750091.g7426	785	XP_027071055.1_probable_galactinol--sucrose_galactosyltransferase_6_[Coffea_arabica]	869	84137	788	0	1404		CDP10449.1	869	83.756	788	0	1399
jcf7180007750096.g7427	300	XP_027099386.1_microtubule-associated_protein_70-2-like_[Coffea_arabica]	627	88889	288	0	531		CDP16283.1	627	88.889	288	0	531
jcf7180007750134.g7431	1100	XP_027061322.1_nuclear_pore_complex_protein_NUP133-like_[Coffea_arabica]	1333	74312	1090	0	1686		CDP18351.1	1333	74.128	1090	0	1679
jcf7180007750250.g7439	841	XP_027074915.1_splicing_factor_1_isoform_X2_[Coffea_arabica]	834	53881	889	0	695		CDP13092.1	801	52.608	882	0	668
jcf7180007750315.g7447	454	XP_027093963.1_DUF21_domain-containing_protein_At1g47330-like_isoform_X1_[Coffea_arabica]	459	84934	458	0	760		CDP07516.1	459	85.153	458	0	763
jcf7180007750318.g7448	464	XP_027125300.1_serine/threonine-protein_kinase_RIPK-like_[Coffea_arabica]	487	72863	468	0	682		CDO97843.1	489	71.762	471	0	672
jcf7180007750404.g7457	534	XP_027126391.1_G_patch_domain-containing_protein_TGH-like_[Coffea_arabica]	993	70019	527	0	723		CDO98491.1	851	70.209	527	0	709
jcf7180007750454.g7466	707	XP_027084867.1_protein_PHOX1-like_[Coffea_arabica]	705	77228	707	0	1117		CDP18813.1	693	76.771	706	0	1104
jcf7180007750523.g7475	522	XP_027116396.1_3-ketoacyl-CoA_synthase_11-like_[Coffea_arabica]	522	77247	523	0	838		CDO99138.1	521	78.161	522	0	863
jcf7180007750578.g7481	514	XP_027106331.1_dynamin-like_protein_ARC5_[Coffea_arabica]	772	89484	523	0	939		CDO97482.1	704	88.978	499	0	891
jcf7180007750746.g7495	666	XP_027066280.1_uncharacterized_protein_LOC113692116_isoform_X1_[Coffea_arabica]	1075	74884	645	0	979		CDP10532.1	1075	75.194	645	0	981
jcf7180007750763.g7497	433	XP_027123755.1_pentatricopeptide_repeat-containing_protein_At5g50990-like_[Coffea_arabica]	552	73903	433	0	677		CDO98300.1	512	73.903	433	0	677
jcf7180007750851.g7507	330	XP_027104649.1_indole-3-acetaldehyde_oxidase-like_[Coffea_arabica]	1379	77508	329	0	560		CDP15629.1	1379	77.204	329	0	559
jcf7180007750856.g7508	806	XP_027084648.1_protein_argonaute_5-like_isoform_X1_[Coffea_arabica]	959	71499	807	0	1173		CDP07006.1	959	71.623	807	0	1158
jcf7180007750874.g7514	953	XP_027096236.1_receptor-like_protein_EIX1_[Coffea_arabica]	961	58307	957	0	1049		CDP16280.1	1035	47.826	1012	0	858
jcf7180007750977.g7525	373	XP_027099408.1_uncharacterized_protein_LOC113718709_isoform_X1_[Coffea_arabica]	421	74309	362	0	576		CDP00746.1	403	74.033	362	0	573
jcf7180007751033.g7535	539	XP_027111888.1_protein_CHUP1,_chloroplastic_[Coffea_arabica]	668	70072	558	0	646		CDO96759.1	644	80.117	342	0	550
jcf7180007751039.g7537	653	XP_027077998.1_kinesin-like_protein_KIN-7F_isoform_X2_[Coffea_arabica]	846	66463	656	0	811		CDP01925.1	959	66.616	656	0	811
jcf7180007751041.g7538	819	XP_027084766.1_cellulose_synthase-like_protein_D3_[Coffea_arabica]	1143	92233	824	0	1585		CDO97026.1	1140	83.475	823	0	1436
jcf7180007751135.g7545	866	XP_027093443.1_probable_beta-D-xylosidase_7_[Coffea_arabica]	778	68116	759	0	1127		CDP01027.1	1426	70.137	730	0	1123
jcf7180007751155.g7549	609	XP_027078270.1_DELLA_protein_GAI-like_[Coffea_arabica]	608	76667	630	0	945		CDP01615.1	541	79.679	561	0	884
jcf7180007751166.g7555	638	XP_027085198.1_ABC_transporter_G_family_member_14-like_[Coffea_arabica]	655	86207	638	0	1129		CDP07185.1	655	86.207	638	0	1129
jcf7180007751212.g7563	785	XP_027074614.1_pentatricopeptide_repeat-containing_protein_At2g03380,_mitochondrial-like_[Coffea_arabica]	795	64993	757	0	1016		CDP02275.1	795	64.861	757	0	1019
jcf7180007751234.g7568	547	XP_027074438.1_3-hydroxy-3-methylglutaryl-coenzyme_A_reductase_1-like_[Coffea_arabica]	604	73597	606	0	866		CDP01752.1	604	73.597	606	0	866
jcf7180007751277.g7573	451	XP_027074917.1_cysteine-rich_receptor-like_protein_kinase_2_[Coffea_arabica]	645	70690	406	0	560		CDP01668.1	561	70.69	406	0	559
jcf7180007751313.g7584	513	XP_027098672.1_sugar_transport_protein_10-like_[Coffea_arabica]	506	78794	514	0	788		CDP20258.1	514	79.377	514	0	810
jcf7180007751330.g7586	480	XP_027089320.1_protein_GRAVITROPIC_IN_THE_LIGHT_1-like_[Coffea_arabica]	585	72727	506	0	706		CDP09140.1	512	72.912	491	0	657
jcf7180007751368.g7600	770	XP_027080030.1_pentatricopeptide_repeat-containing_protein_At4g13650-like_[Coffea_arabica]	773	63069	769	0	1022		CDP12060.1	773	63.137	765	0	1014
jcf7180007751373.g7603	821	XP_027094288.1_uncharacterized_protein_LOC113714577_isoform_X1_[Coffea_arabica]	1434	66626	824	0	1065		CDP16845.1	1428	66.626	824	0	1063
jcf7180007751374.g7604	296	XP_027072530.1_mitochondrial_carrier_protein_CoAc2-like_[Coffea_arabica]	343	88927	289	0	530		CDP03189.1	343	88.927	289	0	528
jcf7180007751393.g7611	392	XP_027115103.1_E3_ubiquitin-protein_ligase_At1g63170-like_[Coffea_arabica]	394	80840	381	0	598		CDP08874.1	394	80.315	381	0	595
jcf7180007751403.g7612	572	XP_027072807.1_laccase-7-like_[Coffea_arabica]	566	69352	571	0	788		CDP06537.1	564	68.366	569	0	782
jcf7180007751452.g7619	385	XP_027089547.1_putative_pectate_lyase_2_[Coffea_arabica]	386	82222	360	0	612		CDP04429.1	348	83.908	348	0	604
jcf7180007751476.g7623	702	XP_027113056.1_LRR_receptor-like_serine/threonine-protein_kinase_GSO2_[Coffea_arabica]	679	80851	658	0	1112		CDO97695.1	679	81.003	658	0	1115
jcf7180007751481.g7625	775	XP_027111107.1_protein_RDM16_isoform_X1_[Coffea_arabica]	876	69520	771	0	889		CDP00017.1	833	62.743	773	0	761
jcf7180007751487.g7626	386	XP_027112676.1_amino_acid_permease_6-like_isoform_X1_[Coffea_arabica]	474	71540	383	0	568		CDP00979.1	482	60.104	386	3.45e-167	480
jcf7180007751528.g7633	443	XP_027090583.1_BTB/POZ_domain-containing_protein_At2g04740-like_[Coffea_arabica]	582	82974	417	0	723		CDP00890.1	582	83.413	416	0	723
jcf7180007751536.g7634	529	XP_027076404.1_splicing_factor_U2af_large_subunit_B_isoform_X6_[Coffea_arabica]	576	89755	449	0	776		CDP02820.1	590	87.446	462	0	769
jcf7180007751565.g7638	1179	XP_027078658.1_uncharacterized_protein_LOC113701943_[Coffea_arabica]	3013	65737	1147	0	1569		CDP02438.1	3191	65.991	1135	0	1565
jcf7180007751579.g7642	359	XP_027094561.1_phospholipid--sterol_O-acyltransferase_[Coffea_arabica]	650	77446	368	0	558		CDP03775.1	650	77.446	368	0	559
jcf7180007751581.g7643	302	XP_027113599.1_uridine_5'-monophosphate_synthase_[Coffea_arabica]	482	87543	289	0	534		CDP07647.1	471	87.5	288	0	531
jcf7180007751607.g7650	397	XP_027106679.1_GTP_3',8-cyclase,_mitochondrial-like_[Coffea_arabica]	397	82872	397	0	682		CDP07673.1	397	82.872	397	0	682
jcf7180007751640.g7662	576	XP_027079056.1_uncharacterized_protein_LOC113702192_isoform_X2_[Coffea_arabica]	452	90708	452	0	855		CDP02587.1	452	89.602	452	0	850
jcf7180007751688.g7668	819	XP_027071101.1_autophagy-related_protein_11_[Coffea_arabica]	1149	78500	800	0	1259		CDP02852.1	1150	78.625	800	0	1260
jcf7180007751689.g7669	804	XP_027090775.1_kinesin-like_protein_KIN-4A_isoform_X3_[Coffea_arabica]	1042	70306	916	0	1242		CDP01299.1	1042	70.306	916	0	1242
jcf7180007751760.g7685	529	XP_027112237.1_laccase-11-like_[Coffea_arabica]	566	80414	531	0	911		CDP02005.1	562	83.932	529	0	946
jcf7180007751769.g7698	645	XP_027112911.1_uncharacterized_protein_LOC113731710_[Coffea_arabica]	643	78067	652	0	957		CDO97480.1	645	76.758	654	0	937
jcf7180007751810.g7707	500	XP_027079188.1_farnesylcysteine_lyase-like_[Coffea_arabica]	521	66053	489	0	611		CDP08400.1	495	65.849	489	0	609
jcf7180007751921.g7725	304	XP_027090780.1_protein_EXORDIUM-like_[Coffea_arabica]	315	80984	305	0	513		CDP01092.1	315	80.984	305	0	513
jcf7180007752042.g7745	539	XP_027072807.1_laccase-7-like_[Coffea_arabica]	566	81262	539	0	909		CDP06537.1	564	79.963	539	0	896
jcf7180007752065.g7749	375	XP_027102502.1_polygalacturonase_At1g48100-like_[Coffea_arabica]	462	80053	376	0	640		CDP15213.1	462	79.787	376	0	639
jcf7180007752066.g7751	542	XP_027113339.1_pentatricopeptide_repeat-containing_protein_At1g14470_[Coffea_arabica]	759	77860	542	0	872		CDO97674.1	759	78.229	542	0	881
jcf7180007752082.g7756	311	XP_027094314.1_isoamylase_3,_chloroplastic-like_[Coffea_arabica]	777	83553	304	0	532		CDP01112.1	777	83.224	304	0	528
jcf7180007752095.g7760	415	XP_027122604.1_ATPase_10,_plasma_membrane-type-like_[Coffea_arabica]	950	83213	417	0	731		CDO97775.1	867	83.173	416	0	730
jcf7180007752114.g7765	357	XP_027124526.1_uncharacterized_protein_LOC113741233_[Coffea_arabica]	352	75350	357	0	514		CDP14924.1	340	72.549	357	1.48e-168	477
jcf7180007752150.g7771	445	XP_027089659.1_tubulin_beta_chain_[Coffea_arabica]	446	94907	432	0	852		CDP12577.1	446	94.907	432	0	852
jcf7180007752152.g7772	355	XP_027076587.1_cysteine_protease_XCP1-like_[Coffea_arabica]	352	71345	342	0	527		CDP18154.1	352	70.76	342	0	525
jcf7180007752199.g7775	915	XP_027117452.1_putative_calcium-transporting_ATPase_13,_plasma_membrane-type_[Coffea_arabica]	1019	66489	940	0	1246		CDP11311.1	1032	65.426	940	0	1227
jcf7180007752206.g7777	392	XP_027089994.1_transcription_factor_bHLH74-like_isoform_X2_[Coffea_arabica]	428	78535	396	0	605		CDP01006.1	270	71.937	253	5.42e-111	329
jcf7180007752295.g7788	274	XP_027117511.1_mitogen-activated_protein_kinase_homolog_NTF3_[Coffea_arabica]	372	95203	271	0	548		CDP03486.1	257	94.553	257	0	514
jcf7180007752297.g7789	387	XP_027126305.1_uncharacterized_protein_LOC113742627_[Coffea_arabica]	459	83591	323	0	546		CDO98184.1	361	83.082	331	0	535
jcf7180007752314.g7791	533	XP_027094825.1_cytochrome_P450_734A1-like_[Coffea_arabica]	504	72079	505	0	738		CDP07542.1	506	64.682	487	0	677
jcf7180007752314.g7792	539	XP_027091773.1_probable_protein_phosphatase_2C_55_[Coffea_arabica]	513	73810	504	0	741		CDP07546.1	513	73.611	504	0	741
jcf7180007752389.g7798	481	XP_027110966.1_actin-related_protein_5-like_isoform_X2_[Coffea_arabica]	692	80040	506	0	790		CDP00115.1	720	79.644	506	0	786
jcf7180007752488.g7816	494	XP_027084181.1_glutamate_receptor_2.3-like_isoform_X2_[Coffea_arabica]	936	62082	538	0	675		CDP14467.1	700	62.547	534	0	674
jcf7180007752551.g7833	475	XP_027123341.1_small_subunit_processome_component_20_homolog_[Coffea_arabica]	2306	68845	459	0	617		CDP21072.1	1629	68.271	457	0	600
jcf7180007752553.g7834	881	XP_027126851.1_pentatricopeptide_repeat-containing_protein_At1g74750-like_[Coffea_arabica]	864	76077	882	0	1399		CDP14888.1	864	75.737	882	0	1392
jcf7180007752559.g7836	629	XP_027072355.1_protein_argonaute_PNH1-like_[Coffea_arabica]	931	79370	635	0	1017		CDP03391.1	931	79.37	635	0	1018
jcf7180007752577.g7841	519	XP_027125919.1_pre-mRNA-splicing_factor_ATP-dependent_RNA_helicase_DEAH1-like_[Coffea_arabica]	1051	73767	446	0	684		CDP18397.1	926	70.323	465	0	662
jcf7180007752583.g7843	381	XP_027110514.1_GDP-mannose_transporter_GONST3-like_[Coffea_arabica]	377	83551	383	0	646		CDP05339.1	377	83.551	383	0	645
jcf7180007752605.g7848	384	XP_027085152.1_serine_carboxypeptidase-like_[Coffea_arabica]	498	72135	384	0	598		CDP07044.1	499	72.135	384	0	594
jcf7180007752648.g7856	594	XP_027123418.1_uncharacterized_protein_LOC113740105_isoform_X1_[Coffea_arabica]	464	68443	469	0	664		CDO98292.1	464	67.804	469	0	657
jcf7180007752676.g7860	384	XP_027108648.1_type_III_polyketide_synthase_B_[Coffea_arabica]	391	83421	380	0	670		CDO96957.1	391	84.085	377	0	673
jcf7180007752702.g7866	621	XP_027083641.1_transmembrane_9_superfamily_member_5-like_isoform_X1_[Coffea_arabica]	587	60307	587	0	716		CDP06928.1	587	60.307	587	0	710
jcf7180007752719.g7867	719	XP_027113641.1_uncharacterized_protein_LOC113732187_[Coffea_arabica]	745	60238	757	0	666		CDP07690.1	695	61.976	739	0	677
jcf7180007752734.g7872	423	XP_027094884.1_serine_carboxypeptidase-like_7_isoform_X2_[Coffea_arabica]	486	59871	466	0	552		CDP21038.1	488	55.28	483	0	531
jcf7180007752748.g7873	520	XP_027116396.1_3-ketoacyl-CoA_synthase_11-like_[Coffea_arabica]	522	90421	522	0	969		CDO99138.1	521	90.211	521	0	992
jcf7180007752812.g7878	457	XP_027064912.1_EP1-like_glycoprotein_2_[Coffea_arabica]	456	59322	472	0	555		CDP06010.1	456	59.322	472	0	555
jcf7180007752871.g7886	361	XP_027115940.1_BTB/POZ_and_MATH_domain-containing_protein_1-like_[Coffea_arabica]	412	78535	396	0	607		CDP03595.1	409	78.372	393	0	602
jcf7180007752890.g7890	420	XP_027127260.1_uncharacterized_serine-rich_protein_C215.13-like_[Coffea_arabica]	433	77531	405	0	526		CDP13613.1	434	77.531	405	0	525
jcf7180007752907.g7894	480	XP_027091239.1_pentatricopeptide_repeat-containing_protein_At5g56310-like_[Coffea_arabica]	494	73423	444	0	687		CDP15794.1	492	72.973	444	0	685
jcf7180007752909.g7895	300	XP_027088853.1_serine/threonine-protein_kinase_STY46-like_isoform_X1_[Coffea_arabica]	570	85933	327	0	580		CDP14531.1	570	85.627	327	0	578
jcf7180007752913.g7896	470	XP_027101007.1_calcium-dependent_protein_kinase_8-like_isoform_X2_[Coffea_arabica]	532	82227	467	0	789		CDP20654.1	532	82.227	467	0	790
jcf7180007752915.g7897	728	XP_027113726.1_LOW_QUALITY_PROTEIN:_zinc_finger_CCCH_domain-containing_protein_30-like_[Coffea_arabica]	735	81658	736	0	1185		CDP07776.1	705	84.703	706	0	1199
jcf7180007752934.g7899	340	XP_027090593.1_O-fucosyltransferase_10-like_isoform_X1_[Coffea_arabica]	576	75595	336	0	546		CDP12443.1	576	74.702	336	0	538
jcf7180007752937.g7902	959	XP_027063189.1_putative_calcium-transporting_ATPase_13,_plasma_membrane-type_[Coffea_arabica]	1016	51506	996	0	916		CDP13737.1	1000	50.1	996	0	878
jcf7180007752951.g7904	418	XP_027110625.1_tRNA_(guanine(26)-N(2))-dimethyltransferase-like_[Coffea_arabica]	419	76039	409	0	647		CDP13916.1	419	75.795	409	0	646
jcf7180007752959.g7907	313	XP_027079295.1_ABC_transporter_D_family_member_1_[Coffea_arabica]	1336	93814	291	0	565		CDP01443.1	1336	94.158	291	0	566
jcf7180007752970.g7910	323	XP_027067232.1_calcium-dependent_protein_kinase_13_[Coffea_arabica]	532	92163	319	0	621		CDP06474.1	532	92.79	319	0	624
jcf7180007753079.g7923	581	XP_027093605.1_transcriptional_corepressor_LEUNIG_HOMOLOG_[Coffea_arabica]	778	85864	573	0	969		CDP03866.1	778	85.864	573	0	969
jcf7180007753098.g7924	1582	XP_027121284.1_protein_TIME_FOR_COFFEE_isoform_X3_[Coffea_arabica]	1632	68119	1653	0	1669		CDO99037.1	1697	67.333	1650	0	1675
jcf7180007753136.g7932	452	XP_027085800.1_protein_CNGC15b-like_[Coffea_arabica]	711	83921	454	0	779		CDP07094.1	680	80.795	453	0	739
jcf7180007753227.g7945	985	XP_027074607.1_pentatricopeptide_repeat-containing_protein_At5g15280,_mitochondrial_[Coffea_arabica]	1260	58865	987	0	1144		CDP02249.1	1250	58.544	989	0	1146
jcf7180007753256.g7949	389	XP_027081813.1_kinesin-like_protein_KIN-UB_isoform_X2_[Coffea_arabica]	808	73522	389	0	544		CDP09862.1	928	72.494	389	0	534
jcf7180007753280.g7951	414	XP_027125069.1_pentatricopeptide_repeat-containing_protein_At3g60050-like_[Coffea_arabica]	507	75291	344	0	545		CDP12685.1	507	75.291	344	0	545
jcf7180007753284.g7953	410	XP_027101954.1_LOW_QUALITY_PROTEIN:_COP9_signalosome_complex_subunit_3_[Coffea_arabica]	475	76923	416	0	639		CDP16669.1	434	76.923	416	0	639
jcf7180007753301.g7954	532	XP_027105611.1_pentatricopeptide_repeat-containing_protein_At4g18840_[Coffea_arabica]	537	72467	523	0	790		CDO96870.1	516	73.062	516	0	791
jcf7180007753312.g7957	520	XP_027087200.1_LOW_QUALITY_PROTEIN:_transcription_termination_factor_MTERF4,_chloroplastic-like_[Coffea_arabica]	516	72603	511	0	747		CDP04544.1	541	72.211	511	0	743
jcf7180007753358.g7963	490	XP_027112031.1_E3_ubiquitin-protein_ligase_UPL3-like_isoform_X1_[Coffea_arabica]	1926	90707	495	0	777		CDO96920.1	1911	90.707	495	0	776
jcf7180007753370.g7964	414	XP_027087219.1_pentatricopeptide_repeat-containing_protein_At5g64320,_mitochondrial-like_isoform_X1_[Coffea_arabica]	728	67554	413	0	597		CDP06291.1	728	67.312	413	0	596
jcf7180007753380.g7966	637	XP_027070683.1_putative_chloride_channel-like_protein_CLC-g_isoform_X1_[Coffea_arabica]	784	82664	473	0	782		CDP10469.1	784	82.452	473	0	781
jcf7180007753418.g7969	447	XP_027083922.1_DNA_polymerase_epsilon_catalytic_subunit_A-like_[Coffea_arabica]	2232	88710	434	0	803		CDP06953.1	2321	86.067	445	0	789
jcf7180007753468.g7981	426	XP_027064831.1_threonine--tRNA_ligase,_chloroplastic/mitochondrial_2-like_isoform_X1_[Coffea_arabica]	688	88967	426	0	802		CDP18259.1	723	88.967	426	0	803
jcf7180007753533.g7989	761	XP_027076327.1_LOW_QUALITY_PROTEIN:_phosphate_transporter_PHO1_homolog_9_[Coffea_arabica]	799	59331	777	0	890		CDP02256.1	769	57.935	775	0	861
jcf7180007753548.g7991	465	XP_027065402.1_serine/threonine-protein_kinase_BSK5-like_[Coffea_arabica]	493	88032	493	0	901		CDP06541.1	493	88.032	493	0	902
jcf7180007753624.g8004	487	XP_027064910.1_subtilisin-like_protease_SBT5.3_[Coffea_arabica]	769	74113	479	0	729		CDP06146.1	769	74.322	479	0	731
jcf7180007753652.g8008	568	XP_027089831.1_probable_rhamnogalacturonate_lyase_B_[Coffea_arabica]	667	73534	597	0	894		CDP00944.1	638	73.367	597	0	892
jcf7180007753697.g8015	461	XP_027116715.1_uncharacterized_protein_LOC113734388_isoform_X2_[Coffea_arabica]	829	62926	499	0	607		CDO99377.1	883	61.057	511	0	599
jcf7180007753719.g8018	406	XP_027126283.1_malonate--CoA_ligase_isoform_X1_[Coffea_arabica]	641	79616	417	0	671		CDO98014.1	335	87.708	301	0	560
jcf7180007753724.g8020	464	XP_027115030.1_zinc_finger_protein_GAI-ASSOCIATED_FACTOR_1-like_[Coffea_arabica]	490	74590	488	0	644		CDP03675.1	484	74.587	484	0	639
jcf7180007753726.g8021	424	XP_027080412.1_lysine-specific_demethylase_5A-like_[Coffea_arabica]	1847	66905	420	0	580		CDP09743.1	1888	66.826	419	0	580
jcf7180007753733.g8024	683	XP_027079547.1_protein_CHROMATIN_REMODELING_5_isoform_X2_[Coffea_arabica]	1709	85845	657	0	1152		CDP08483.1	1712	85.584	659	0	1147
jcf7180007753787.g8035	367	XP_027094699.1_probable_protein_phosphatase_2C_12_[Coffea_arabica]	429	88515	357	0	656		CDP01349.1	429	88.796	357	0	660
jcf7180007753838.g8041	395	XP_027100208.1_uncharacterized_protein_LOC113719244_isoform_X2_[Coffea_arabica]	628	74406	379	0	603		CDP13244.1	393	74.474	380	0	599
jcf7180007753885.g8046	1872	XP_027114632.1_DNA_polymerase_zeta_catalytic_subunit-like_isoform_X2_[Coffea_arabica]	1968	62896	1547	0	1866		CDP15503.1	1982	62.637	1547	0	1865
jcf7180007753989.g8060	1581	XP_027097153.1_uncharacterized_protein_LOC113716846_isoform_X1_[Coffea_arabica]	1578	65741	1585	0	1914		CDP13380.1	1578	65.552	1585	0	1909
jcf7180007754021.g8066	565	XP_027112237.1_laccase-11-like_[Coffea_arabica]	566	86195	565	0	1032		CDO97037.1	566	86.195	565	0	1032
jcf7180007754054.g8069	466	XP_027125673.1_geranylgeranyl_diphosphate_reductase,_chloroplastic_[Coffea_arabica]	468	89103	468	0	828		CDP12299.1	468	88.889	468	0	825
jcf7180007754100.g8078	400	XP_027116374.1_ATP_sulfurylase_1,_chloroplastic-like_[Coffea_arabica]	465	88295	393	0	719		CDO99119.1	465	88.041	393	0	721
jcf7180007754188.g8087	710	XP_027114242.1_putative_late_blight_resistance_protein_homolog_R1A-3_[Coffea_arabica]	890	49349	691	0	653		CDP18959.1	890	49.059	691	0	651
jcf7180007754235.g8094	1368	XP_027080550.1_pleiotropic_drug_resistance_protein_1-like_[Coffea_arabica]	1448	77034	1450	0	2283		CDP04826.1	1448	77.157	1449	0	2278
jcf7180007754320.g8108	545	XP_027071087.1_T-complex_protein_1_subunit_theta-like_[Coffea_arabica]	545	85409	562	0	964		CDP14327.1	545	85.409	562	0	964
jcf7180007754320.g8109	357	XP_027070990.1_photosynthetic_NDH_subunit_of_subcomplex_B_2,_chloroplastic-like_[Coffea_arabica]	363	71311	366	0	524		CDP14328.1	363	70.685	365	0	523
jcf7180007754320.g8111	611	XP_027070989.1_protein_SINE1-like_[Coffea_arabica]	592	70279	609	0	843		CDP14330.1	592	70.279	609	0	842
jcf7180007754363.g8114	455	XP_027063603.1_protein_ROOT_PRIMORDIUM_DEFECTIVE_1-like_[Coffea_arabica]	467	66811	461	0	600		CDP16087.1	467	66.594	461	0	599
jcf7180007754367.g8115	1256	XP_027074215.1_ABC_transporter_B_family_member_19_[Coffea_arabica]	1250	41034	1238	0	954		CDP04961.1	1278	72.386	1253	0	1845
jcf7180007754469.g8132	363	XP_027091682.1_squalene_epoxidase_1-like_[Coffea_arabica]	532	91054	313	0	595		CDP01001.1	532	91.054	313	0	595
jcf7180007754508.g8138	521	XP_027077497.1_probable_serine/threonine-protein_kinase_PBL23_isoform_X1_[Coffea_arabica]	525	81559	526	0	876		CDP02704.1	526	81.107	524	0	867
jcf7180007754510.g8139	591	XP_027109707.1_probable_pectinesterase/pectinesterase_inhibitor_58_[Coffea_arabica]	660	60685	496	0	619		CDP21547.1	666	60.685	496	0	617
jcf7180007754513.g8140	360	XP_027090794.1_heat_stress_transcription_factor_B-4-like_[Coffea_arabica]	377	79947	379	0	553		CDP01323.1	299	71.271	362	1.78e-164	466
jcf7180007754544.g8145	839	XP_027110535.1_pentatricopeptide_repeat-containing_protein_At1g02060,_chloroplastic-like_[Coffea_arabica]	748	68942	718	0	1006		CDP13864.1	751	69.038	717	0	1010
jcf7180007754575.g8147	1100	XP_027078425.1_uncharacterized_protein_LOC113701808_isoform_X3_[Coffea_arabica]	1151	42581	984	0	615		CDP16011.1	1184	43.1	1000	0	612
jcf7180007754590.g8150	437	XP_027068128.1_uncharacterized_protein_LOC113693716_[Coffea_arabica]	524	81633	441	0	746		CDP19944.1	524	81.633	441	0	746
jcf7180007754603.g8153	432	XP_027071221.1_magnesium-protoporphyrin_IX_monomethyl_ester_[oxidative]_cyclase,_chloroplastic_[Coffea_arabica]	427	83771	419	0	706		CDP14343.1	426	83.771	419	0	706
jcf7180007754625.g8156	413	XP_027078841.1_magnesium-chelatase_subunit_ChlI,_chloroplastic-like_[Coffea_arabica]	429	90051	392	0	718		CDP04687.1	429	90.306	392	0	719
jcf7180007754647.g8159	373	XP_027068260.1_nuclear_pore_complex_protein_NUP93A-like_[Coffea_arabica]	863	82621	351	0	603		CDP14142.1	919	70.025	407	0	566
jcf7180007754673.g8165	287	XP_027084617.1_probable_methyltransferase_PMT14_[Coffea_arabica]	612	85263	285	0	526		CDP12957.1	612	84.912	285	0	525
jcf7180007754796.g8177	469	XP_027122412.1_cytochrome_P450_71A4-like_[Coffea_arabica]	513	62622	511	0	650		CDP20451.1	443	62.697	445	0	572
jcf7180007754814.g8180	497	XP_027112151.1_endoglucanase_24-like_[Coffea_arabica]	500	84646	495	0	866		CDO96993.1	499	83.434	495	0	848
jcf7180007754871.g8188	466	XP_027062084.1_probable_galacturonosyltransferase_10_[Coffea_arabica]	534	90987	466	0	896		CDP14710.1	534	90.343	466	0	889
jcf7180007754886.g8189	711	XP_027095342.1_protein_terminal_ear1-like_[Coffea_arabica]	728	61050	724	0	733		CDP13262.1	611	64.034	595	0	642
jcf7180007754888.g8191	860	XP_027084668.1_homeobox-leucine_zipper_protein_ATHB-15-like_[Coffea_arabica]	842	75561	892	0	1385		CDP08173.1	841	75.478	889	0	1384
jcf7180007754900.g8193	940	XP_027072696.1_uncharacterized_protein_LOC113697316_[Coffea_arabica]	750	74866	748	0	1198		CDP15763.1	750	74.733	748	0	1196
jcf7180007754983.g8204	708	XP_027114918.1_pleiotropic_drug_resistance_protein_3-like_[Coffea_arabica]	1448	73846	715	0	1106		CDP15193.1	1450	73.045	716	0	1085
jcf7180007754990.g8206	436	XP_027081305.1_uncharacterized_protein_LOC113703959_isoform_X1_[Coffea_arabica]	465	82831	431	0	737		CDP07165.1	451	82.831	431	0	738
jcf7180007755037.g8209	313	XP_027111013.1_very-long-chain_enoyl-CoA_reductase-like_[Coffea_arabica]	310	85959	292	0	523		CDP00087.1	310	85.616	292	0	521
jcf7180007755095.g8215	510	XP_027072279.1_3-ketoacyl-CoA_synthase_11-like_[Coffea_arabica]	510	86275	510	0	934		CDP03396.1	510	86.275	510	0	934
jcf7180007755146.g8219	597	XP_027118419.1_bromodomain_and_WD_repeat-containing_protein_3-like_isoform_X1_[Coffea_arabica]	1614	79427	593	0	920		CDP17076.1	1573	79.457	589	0	913
jcf7180007755208.g8230	530	XP_027117990.1_pentatricopeptide_repeat-containing_protein_At5g08305_[Coffea_arabica]	542	71769	503	0	754		CDP19158.1	542	71.769	503	0	754
jcf7180007755226.g8232	505	XP_027099486.1_high_affinity_nitrate_transporter_2.5_[Coffea_arabica]	506	85686	503	0	846		CDP13197.1	506	85.288	503	0	835
jcf7180007755238.g8236	652	XP_027103944.1_acid_beta-fructofuranosidase-like_isoform_X1_[Coffea_arabica]	661	63811	572	0	763		CDP09916.1	682	70.154	650	0	924
jcf7180007755270.g8241	529	XP_027106673.1_callose_synthase_2-like_isoform_X2_[Coffea_arabica]	1869	78571	546	0	861		CDP07677.1	1451	78.755	546	0	864
jcf7180007755371.g8256	1219	XP_027089601.1_protein_ILITYHIA_[Coffea_arabica]	2588	80918	1242	0	1941		CDP04260.1	2664	86.12	1268	0	2142
jcf7180007755385.g8257	601	XP_027125022.1_probable_WRKY_transcription_factor_61_[Coffea_arabica]	632	65881	636	0	690		CDP20785.1	534	69.373	542	0	618
jcf7180007755406.g8261	397	XP_027094050.1_tubby-like_F-box_protein_8_[Coffea_arabica]	428	83916	429	0	723		CDP11400.1	428	83.916	429	0	723
jcf7180007755441.g8265	561	XP_027080583.1_protein_NUCLEAR_FUSION_DEFECTIVE_4-like_[Coffea_arabica]	557	64621	554	0	673		CDP07180.1	557	64.801	554	0	667
jcf7180007755474.g8268	773	XP_027090039.1_putative_pentatricopeptide_repeat-containing_protein_At2g02150_[Coffea_arabica]	775	64036	773	0	1028		CDP10983.1	775	63.907	773	0	1027
jcf7180007755482.g8269	565	XP_027088831.1_lysM_domain_receptor-like_kinase_3_[Coffea_arabica]	618	72006	618	0	876		CDP11343.1	608	63.547	609	0	774
jcf7180007755527.g8275	401	XP_027079543.1_serine--glyoxylate_aminotransferase_[Coffea_arabica]	401	92269	401	0	776		CDP08481.1	401	92.02	401	0	773
jcf7180007755597.g8286	464	XP_027074981.1_LOW_QUALITY_PROTEIN:_U-box_domain-containing_protein_40-like_[Coffea_arabica]	520	71058	463	0	595		CDP02155.1	506	71.922	463	0	615
jcf7180007755601.g8288	443	XP_027127048.1_heat_stress_transcription_factor_A-4b-like_[Coffea_arabica]	443	71171	444	0	650		CDP18749.1	404	69.34	424	0	595
jcf7180007755776.g8309	381	XP_027079297.1_probable_galacturonosyltransferase_14_[Coffea_arabica]	542	88235	391	0	705		CDP02301.1	543	88.491	391	0	704
jcf7180007755824.g8312	611	XP_027098946.1_LOW_QUALITY_PROTEIN:_chromatin_structure-remodeling_complex_protein_SYD-like_[Coffea_arabica]	3122	58898	635	0	678		CDP19556.1	3131	58.805	636	0	683
jcf7180007755936.g8318	529	XP_027092286.1_uncharacterized_protein_LOC113712873_[Coffea_arabica]	591	68352	534	0	669		CDP01326.1	587	68.797	532	0	669
jcf7180007755939.g8319	500	XP_027114239.1_exportin-7_isoform_X1_[Coffea_arabica]	1053	80151	529	0	835		CDP18960.1	1059	80.151	529	0	835
jcf7180007755941.g8320	837	XP_027126016.1_putative_disease_resistance_protein_RGA3_[Coffea_arabica]	981	60370	540	0	640		CDO97841.1	954	60.37	540	0	639
jcf7180007755953.g8321	487	XP_027112356.1_pentatricopeptide_repeat-containing_protein_At2g15980-like_[Coffea_arabica]	538	65646	457	0	608		CDO97103.1	507	65.721	458	0	612
jcf7180007755955.g8322	543	XP_027110722.1_laccase-5-like_[Coffea_arabica]	571	85352	512	0	922		CDP13965.1	571	85.156	512	0	923
jcf7180007755961.g8323	420	XP_027105675.1_endo-1,4-beta-xylanase_5-like_[Coffea_arabica]	575	77451	408	0	675		CDO96931.1	656	77.451	408	0	674
jcf7180007756000.g8326	591	XP_027104670.1_protein_EIN4_[Coffea_arabica]	765	75862	580	0	900		CDO99970.1	765	75.862	580	0	900
jcf7180007756047.g8328	595	XP_027066988.1_TOM1-like_protein_6_[Coffea_arabica]	645	65986	588	0	693		CDP06409.1	554	61.71	538	0	572
jcf7180007756086.g8334	949	XP_027112687.1_serine/threonine-protein_kinase_TOR_[Coffea_arabica]	2469	91585	915	0	1745		CDO97312.1	2214	89.711	933	0	1731
jcf7180007756098.g8335	471	XP_027070360.1_uncharacterized_protein_LOC113695451_[Coffea_arabica]	430	64108	443	0	581		CDP07122.1	467	63.694	471	0	616
jcf7180007756135.g8344	748	XP_027084622.1_phospholipase_D_alpha_1-like_[Coffea_arabica]	825	67021	752	0	1023		CDP13512.1	825	67.333	750	0	1027
jcf7180007756181.g8347	1270	XP_027120290.1_leucine-rich_repeat_receptor_protein_kinase_MSP1-like_[Coffea_arabica]	1265	73539	1266	0	1857		CDP14637.1	1265	73.539	1266	0	1850
jcf7180007756183.g8348	502	XP_027094836.1_low_affinity_sulfate_transporter_3-like_isoform_X2_[Coffea_arabica]	650	79352	494	0	797		CDP01189.1	646	79.381	485	0	763
jcf7180007756237.g8354	763	XP_027101547.1_endoglucanase_1-like_[Coffea_arabica]	495	81837	490	0	820		CDP12234.1	495	81.429	490	0	817
jcf7180007756263.g8355	630	XP_027065174.1_uncharacterized_protein_LOC113691282_[Coffea_arabica]	633	72258	620	0	962		CDP15622.1	630	74.475	619	0	984
jcf7180007756272.g8358	529	XP_027086103.1_berberine_bridge_enzyme-like_21_[Coffea_arabica]	540	69574	516	0	720		CDP12590.1	540	69.574	516	0	722
jcf7180007756378.g8373	426	XP_027115453.1_F-box/kelch-repeat_protein_SKIP30-like_[Coffea_arabica]	347	89766	342	0	637		CDP03650.1	347	89.474	342	0	636
jcf7180007756407.g8378	325	XP_027079447.1_solute_carrier_family_25_member_44-like_[Coffea_arabica]	320	88889	315	0	582		CDP02337.1	271	87.356	261	3.82e-168	472
jcf7180007756421.g8379	424	XP_027074435.1_anthranilate_phosphoribosyltransferase,_chloroplastic-like_[Coffea_arabica]	402	75339	369	0	541		CDP02090.1	464	75.137	366	0	536
jcf7180007756426.g8381	426	XP_027091187.1_dynamin-2A-like_[Coffea_arabica]	922	91315	403	0	760		CDP00856.1	923	91.563	403	0	761
jcf7180007756712.g8407	1718	XP_027099926.1_sacsin-like_[Coffea_arabica]	4772	72381	840	0	1244		CDP11009.1	4772	72.262	840	0	1243
jcf7180007756737.g8409	482	XP_027101491.1_probable_xyloglucan_galactosyltransferase_GT12_[Coffea_arabica]	575	64241	481	0	637		CDP09068.1	510	71.274	369	0	577
jcf7180007756771.g8419	486	XP_027118020.1_BTB/POZ_domain-containing_protein_At5g03250_isoform_X1_[Coffea_arabica]	584	83951	486	0	859		CDP19145.1	595	83.539	486	0	856
jcf7180007756774.g8420	809	XP_027068848.1_uncharacterized_protein_LOC113694184_isoform_X1_[Coffea_arabica]	826	71981	828	0	1248		CDP10071.1	784	72.772	808	0	1231
jcf7180007756947.g8439	447	XP_027078127.1_eukaryotic_translation_initiation_factor_5-like_[Coffea_arabica]	449	77303	445	0	662		CDP02729.1	332	71.341	328	1.01e-147	427
jcf7180007756981.g8443	853	XP_027113890.1_protein_TSS-like_isoform_X2_[Coffea_arabica]	1902	55814	946	0	941		CDP16352.1	1906	54.488	947	0	908
jcf7180007757028.g8445	670	XP_027125007.1_tRNase_Z_TRZ3,_mitochondrial_isoform_X1_[Coffea_arabica]	1017	65012	423	0	553		CDO97999.1	1005	64.066	423	1.96e-180	543
jcf7180007757154.g8457	586	XP_027094956.1_uncharacterized_protein_LOC113715006_[Coffea_arabica]	2207	57246	552	0	595		CDP01207.1	1184	49.479	384	8e-110	358
jcf7180007757251.g8466	527	XP_027098158.1_ankyrin_repeat-containing_protein_At2g01680-like_[Coffea_arabica]	523	82027	523	0	907		CDP16304.1	523	81.836	523	0	904
jcf7180007757256.g8468	524	XP_027077835.1_protein_GAMETE_EXPRESSED_3-like_isoform_X1_[Coffea_arabica]	708	67241	522	0	724		CDP02395.1	714	67.057	513	0	706
jcf7180007757299.g8472	384	XP_027113345.1_NAC_domain-containing_protein_35-like_[Coffea_arabica]	387	80964	394	0	604		CDO97677.1	368	78.827	392	0	582
jcf7180007757305.g8474	1706	XP_027106714.1_DDT_domain-containing_protein_PTM-like_isoform_X1_[Coffea_arabica]	1701	59852	1756	0	1943		CDP06993.1	1702	59.875	1757	0	1939
jcf7180007757308.g8475	287	XP_027100639.1_mitochondrial_succinate-fumarate_transporter_1-like_[Coffea_arabica]	310	92683	287	0	563		CDP18452.1	310	91.986	287	0	561
jcf7180007757332.g8476	379	XP_027095359.1_F-box/kelch-repeat_protein_OR23_[Coffea_arabica]	417	77690	381	0	610		CDP03718.1	417	78.74	381	0	617
jcf7180007757437.g8479	791	XP_027102763.1_filament-like_plant_protein_7_[Coffea_arabica]	1068	56753	807	0	865		CDO97196.1	768	50.881	511	3.44e-149	459
jcf7180007757462.g8484	353	XP_027125952.1_glycine--tRNA_ligase,_mitochondrial_1-like_[Coffea_arabica]	625	88000	350	0	652		CDO98302.1	621	88.385	353	0	660
jcf7180007757468.g8489	431	XP_027099331.1_L-tryptophan--pyruvate_aminotransferase_1_[Coffea_arabica]	403	66929	381	0	556		CDP13202.1	403	67.454	381	0	559
jcf7180007757530.g8492	1029	XP_027081536.1_WD_repeat-containing_protein_7-like_[Coffea_arabica]	1032	61293	1036	0	1215		CDP12080.1	1512	60.597	1038	0	1206
jcf7180007757570.g8495	625	XP_027111682.1_heterogeneous_nuclear_ribonucleoprotein_U-like_protein_1_[Coffea_arabica]	623	53301	621	0	613		CDO99634.1	726	51.375	691	0	628
jcf7180007757616.g8502	402	XP_027126719.1_periodic_tryptophan_protein_2-like_[Coffea_arabica]	888	90404	396	0	746		CDO98116.1	888	90.152	396	0	745
jcf7180007757644.g8505	801	XP_027122896.1_sucrose_synthase_7-like_[Coffea_arabica]	906	72986	844	0	1272		CDO98606.1	860	75	824	0	1283
jcf7180007757664.g8508	343	XP_027078974.1_ABC_transporter_B_family_member_27-like_isoform_X1_[Coffea_arabica]	649	92500	320	0	587		CDP02333.1	635	92.5	320	0	587
jcf7180007757730.g8514	752	XP_027089086.1_oligopeptide_transporter_3-like_[Coffea_arabica]	755	90897	736	0	1379		CDP04526.1	755	90.625	736	0	1378
jcf7180007757813.g8527	413	XP_027094594.1_protein_NPGR2_isoform_X1_[Coffea_arabica]	731	70087	458	0	634		CDP03773.1	731	69.214	458	0	629
jcf7180007757949.g8549	291	XP_027076227.1_hypersensitive-induced_response_protein_1-like_[Coffea_arabica]	290	92096	291	0	556		CDP02195.1	290	92.096	291	0	554
jcf7180007758058.g8560	550	XP_027062601.1_probable_galactinol--sucrose_galactosyltransferase_1_[Coffea_arabica]	751	80110	543	0	926		CDP13658.1	756	79.562	548	0	920
jcf7180007758118.g8568	769	XP_027096346.1_subtilisin-like_protease_SBT4.13_[Coffea_arabica]	737	51425	772	0	747		CDP00292.1	743	51.425	772	0	747
jcf7180007758153.g8573	391	XP_027125298.1_COBRA-like_protein_2_isoform_X1_[Coffea_arabica]	458	77926	376	0	630		CDP15248.1	458	77.66	376	0	628
jcf7180007758229.g8578	679	XP_027097146.1_ubiquitin-like_modifier-activating_enzyme_atg7_isoform_X1_[Coffea_arabica]	708	67896	651	0	897		CDP00251.1	710	67.02	661	0	891
jcf7180007758230.g8579	320	XP_027125571.1_probable_phospholipid-transporting_ATPase_4_[Coffea_arabica]	1230	90615	309	0	619		CDO97890.1	1230	90.615	309	0	620
jcf7180007758246.g8580	1265	XP_027089067.1_5-oxoprolinase-like_[Coffea_arabica]	1268	88556	1267	0	2303		CDP05633.1	1268	88.319	1267	0	2293
jcf7180007758306.g8587	534	XP_027096360.1_phosphatidylinositol_3-kinase,_root_isoform-like,_partial_[Coffea_arabica]	556	96987	531	0	1067		CDP13176.1	815	96.792	530	0	1065
jcf7180007758368.g8596	1574	XP_027111389.1_transcriptional_activator_DEMETER-like_[Coffea_arabica]	1906	40986	1237	0	724		CDO99852.1	1906	40.744	1237	0	711
jcf7180007758391.g8597	285	XP_027084012.1_replication_factor_C_subunit_2_[Coffea_arabica]	334	93640	283	0	553		CDP09794.1	334	93.64	283	0	553
jcf7180007758424.g8603	762	XP_027078334.1_subtilisin-like_protease_SBT1.9_[Coffea_arabica]	764	70395	760	0	1137		CDP17956.1	725	71.074	726	0	1085
jcf7180007758426.g8604	326	XP_027092832.1_probable_isoaspartyl_peptidase/L-asparaginase_2_[Coffea_arabica]	325	89846	325	0	607		CDP01286.1	325	89.538	325	0	604
jcf7180007758550.g8620	555	XP_027070471.1_trihelix_transcription_factor_PTL-like_[Coffea_arabica]	587	68855	594	0	707		CDP15371.1	526	66.259	572	0	661
jcf7180007758630.g8630	554	XP_027110849.1_laccase-4-like_[Coffea_arabica]	555	81261	555	0	964		CDP14064.1	555	81.081	555	0	961
jcf7180007758643.g8632	604	XP_027096603.1_elongator_complex_protein_2-like_[Coffea_arabica]	834	72907	657	0	983		CDP00672.1	834	72.907	657	0	982
jcf7180007758646.g8635	388	XP_027103947.1_LOW_QUALITY_PROTEIN:_trehalose-phosphate_phosphatase_A-like_[Coffea_arabica]	384	78307	378	0	605		CDP05325.1	384	78.421	380	0	610
jcf7180007758672.g8638	517	XP_027112621.1_QWRF_motif-containing_protein_2-like_[Coffea_arabica]	651	82377	488	0	703		CDO97267.1	650	82.172	488	0	701
jcf7180007758795.g8654	353	XP_027097397.1_uncharacterized_protein_LOC113716988_isoform_X1_[Coffea_arabica]	456	73699	346	0	542		CDP00496.1	420	75	336	0	540
jcf7180007758799.g8655	314	XP_027084668.1_homeobox-leucine_zipper_protein_ATHB-15-like_[Coffea_arabica]	842	92459	305	0	597		CDP08173.1	841	92.459	305	0	597
jcf7180007759019.g8676	429	XP_027070822.1_protein_unc-13_homolog_[Coffea_arabica]	1001	77156	429	0	712		CDP03276.1	901	77.156	429	0	708
jcf7180007759068.g8677	339	XP_027099730.1_paladin-like_isoform_X1_[Coffea_arabica]	1257	86604	321	0	564		CDP17042.1	1262	86.335	322	0	560
jcf7180007759113.g8679	547	XP_027070419.1_LOW_QUALITY_PROTEIN:_putative_pentatricopeptide_repeat-containing_protein_At3g13770,_mitochondrial_[Coffea_arabica]	644	65511	519	0	731		CDP04327.1	652	39.645	507	2.61e-123	380
jcf7180007759143.g8682	622	XP_027092276.1_activating_signal_cointegrator_1_complex_subunit_2-like_isoform_X6_[Coffea_arabica]	651	67772	543	0	736		CDP01206.1	848	67.956	543	0	737
jcf7180007759221.g8699	674	XP_027114303.1_probable_inactive_leucine-rich_repeat_receptor-like_protein_kinase_At3g03770_[Coffea_arabica]	775	71341	656	0	929		CDP16547.1	775	70.579	656	0	917
jcf7180007759331.g8707	584	XP_027062314.1_BTB/POZ_domain-containing_protein_At1g04390-like_isoform_X1_[Coffea_arabica]	1014	58609	575	0	655		CDP13610.1	1014	58.957	575	0	661
jcf7180007759363.g8712	681	XP_027094457.1_uncharacterized_protein_LOC113714645_[Coffea_arabica]	831	75184	681	0	1074		CDP14081.1	1562	75.184	681	0	1079
jcf7180007759403.g8715	711	XP_027118910.1_protein_NPGR2-like_[Coffea_arabica]	731	80591	711	0	1142		CDO99268.1	731	80.591	711	0	1140
jcf7180007759442.g8722	420	XP_027071211.1_RNA_polymerase_sigma_factor_sigF,_chloroplastic_isoform_X1_[Coffea_arabica]	556	63972	433	0	529		CDP06761.1	556	63.972	433	0	529
jcf7180007759508.g8725	510	XP_027120728.1_cytochrome_P450_71A2-like_[Coffea_arabica]	518	62016	516	0	664		CDP08073.1	517	63.454	498	0	657
jcf7180007759536.g8734	392	XP_027113785.1_notchless_protein_homolog_isoform_X1_[Coffea_arabica]	479	89971	349	0	645		CDP19300.1	479	89.685	349	0	644
jcf7180007759556.g8737	340	XP_027125984.1_pyruvate_dehydrogenase_E1_component_subunit_beta-2,_mitochondrial_[Coffea_arabica]	369	79404	369	0	601		CDO98675.1	369	79.946	369	0	604
jcf7180007759562.g8738	467	XP_027070557.1_organic_cation/carnitine_transporter_7-like_[Coffea_arabica]	469	72222	450	0	643		CDP14260.1	488	72.222	450	0	650
jcf7180007759564.g8739	408	XP_027113115.1_protein_RETICULATA-RELATED_1,_chloroplastic_[Coffea_arabica]	541	89080	348	0	649		CDO97538.1	527	89.08	348	0	650
jcf7180007759608.g8743	652	XP_027096511.1_LEAF_RUST_10_DISEASE-RESISTANCE_LOCUS_RECEPTOR-LIKE_PROTEIN_KINASE-like_1.5_[Coffea_arabica]	666	76508	630	0	953		CDP00659.1	414	48.101	316	6.04e-85	275
jcf7180007759617.g8744	522	XP_027116457.1_cellulose_synthase-like_protein_G2_isoform_X2_[Coffea_arabica]	738	64224	464	0	629		CDO99183.1	746	61.02	490	0	585
jcf7180007759660.g8751	449	XP_027087503.1_scarecrow-like_protein_13_[Coffea_arabica]	544	80624	449	0	774		CDP04504.1	544	80.624	449	0	774
jcf7180007759799.g8761	855	XP_027110109.1_pentatricopeptide_repeat-containing_protein_At3g49170,_chloroplastic-like_[Coffea_arabica]	862	73349	863	0	1350		CDP05081.1	862	73.233	863	0	1343
jcf7180007759864.g8765	680	XP_027094126.1_MDIS1-interacting_receptor_like_kinase_1_[Coffea_arabica]	1017	77929	734	0	1123		CDP03798.1	1017	78.065	734	0	1129
jcf7180007759875.g8768	613	XP_027083207.1_uncharacterized_protein_LOC113705527_[Coffea_arabica]	651	66453	623	0	835		CDP06875.1	651	66.613	623	0	824
jcf7180007759881.g8770	635	XP_027118013.1_ankyrin_repeat_protein_SKIP35_[Coffea_arabica]	627	83968	630	0	1077		CDP19146.1	603	80.612	588	0	943
jcf7180007759909.g8774	473	XP_027066495.1_protein_virilizer_homolog_[Coffea_arabica]	1211	77253	466	0	745		CDP10591.1	2202	77.468	466	0	749
jcf7180007759960.g8777	374	XP_027126332.1_UV-B-induced_protein_At3g17800,_chloroplastic-like_[Coffea_arabica]	424	80749	374	0	601		CDO98647.1	424	82.086	374	0	612
jcf7180007759978.g8778	777	XP_027071512.1_serine/threonine-protein_kinase-like_protein_CCR1_[Coffea_arabica]	779	78313	747	0	1185		CDP06737.1	778	78.15	746	0	1173
jcf7180007760015.g8786	606	XP_027074901.1_inactive_LRR_receptor-like_serine/threonine-protein_kinase_BIR2_[Coffea_arabica]	602	87219	579	0	1040		CDP02178.1	602	87.219	579	0	1040
jcf7180007760016.g8788	679	XP_027099176.1_uncharacterized_protein_LOC113718472_[Coffea_arabica]	1256	44158	659	0	620		CDO99984.1	847	38.509	322	7.91e-79	270
jcf7180007760039.g8795	377	XP_027085598.1_ABC_transporter_G_family_member_28-like_[Coffea_arabica]	1055	83285	347	0	586		CDP07078.1	1102	83.285	347	0	587
jcf7180007760189.g8806	566	XP_027078549.1_O-fucosyltransferase_27-like_isoform_X1_[Coffea_arabica]	693	79646	565	0	900		CDP02351.1	704	78.179	582	0	873
jcf7180007760197.g8807	482	XP_027094524.1_BEACH_domain-containing_protein_B_isoform_X4_[Coffea_arabica]	2937	84746	472	0	834		CDP00930.1	2887	84.322	472	0	832
jcf7180007760279.g8824	492	XP_027066962.1_tubulin_alpha-3_chain-like_[Coffea_arabica]	450	88008	492	0	897		CDP14299.1	450	88.415	492	0	897
jcf7180007760287.g8831	313	XP_027125927.1_26S_proteasome_regulatory_subunit_7_homolog_A_[Coffea_arabica]	430	84195	348	0	575		CDO97778.1	430	84.195	348	0	575
jcf7180007760313.g8835	718	XP_027080995.1_pentatricopeptide_repeat-containing_protein_At5g46580,_chloroplastic-like_[Coffea_arabica]	715	81476	718	0	1229		CDP12991.1	718	81.415	721	0	1219
jcf7180007760339.g8837	384	XP_027119758.1_uncharacterized_protein_LOC113736799_[Coffea_arabica]	383	71582	373	0	548		CDO98801.1	330	71.56	327	3.1e-168	477
jcf7180007760396.g8844	957	XP_027110950.1_pumilio_homolog_1-like_isoform_X1_[Coffea_arabica]	1011	81303	936	0	1449		CDP00123.1	992	81.485	929	0	1441
jcf7180007760478.g8854	870	XP_027120971.1_E3_ubiquitin-protein_ligase_UPL6-like_isoform_X1_[Coffea_arabica]	1033	69944	885	0	1187		CDO98729.1	1033	69.153	885	0	1172
jcf7180007760510.g8858	435	XP_027100214.1_F-box_only_protein_6-like_[Coffea_arabica]	464	89398	415	0	783		CDP13350.1	442	88.804	393	0	736
jcf7180007760513.g8859	411	XP_027071246.1_CDK5RAP3-like_protein_isoform_X1_[Coffea_arabica]	570	72837	416	0	585		CDP20022.1	570	72.837	416	0	584
jcf7180007760513.g8860	642	XP_027067407.1_protein_STRUBBELIG-RECEPTOR_FAMILY_2-like_[Coffea_arabica]	737	54127	739	0	738		CDP20023.1	700	54.274	702	0	705
jcf7180007760558.g8862	408	XP_027087065.1_187-kDa_microtubule-associated_protein_AIR9_[Coffea_arabica]	1022	78934	394	0	661		CDP05615.1	1741	78.68	394	0	656
jcf7180007760589.g8867	346	XP_027118713.1_LOW_QUALITY_PROTEIN:_protein_translocase_subunit_SecA,_chloroplastic-like_[Coffea_arabica]	851	89636	357	0	625		CDP17035.1	1008	94.706	340	0	643
jcf7180007760608.g8868	675	XP_027077924.1_ATP-dependent_zinc_metalloprotease_FTSH_6,_chloroplastic-like_[Coffea_arabica]	681	85630	682	0	1171		CDP01723.1	681	85.191	682	0	1166
jcf7180007760687.g8878	540	XP_027116190.1_probable_LRR_receptor-like_serine/threonine-protein_kinase_RKF3_[Coffea_arabica]	651	76064	376	0	592		CDP03584.1	648	75.815	368	0	581
jcf7180007760690.g8879	367	XP_027069962.1_serine_carboxypeptidase_24_isoform_X2_[Coffea_arabica]	462	77309	379	0	633		CDP10248.1	458	77.045	379	0	629
jcf7180007760870.g8903	657	XP_027061008.1_uncharacterized_protein_LOC113687646_[Coffea_arabica]	1769	53868	711	0	704		CDP05916.1	696	75.775	355	0	569
jcf7180007761053.g8917	813	XP_027095503.1_uncharacterized_protein_LOC113715484_[Coffea_arabica]	787	74593	799	0	1211		CDP10229.1	301	27.178	287	1.5e-31	126
jcf7180007761081.g8918	490	XP_027114183.1_UDP-glycosyltransferase_86A1-like_isoform_X2_[Coffea_arabica]	488	76939	490	0	798		CDP18343.1	488	76.939	490	0	798
jcf7180007761143.g8932	307	XP_027063578.1_putative_beta-glucosidase_41_[Coffea_arabica]	510	80731	301	0	528		CDP05824.1	510	80.731	301	0	528
jcf7180007761175.g8941	655	XP_027091490.1_NAD_kinase_2,_chloroplastic-like_isoform_X2_[Coffea_arabica]	993	66564	649	0	840		CDP10995.1	463	74.23	357	0	555
jcf7180007761257.g8948	414	XP_027126665.1_LEAF_RUST_10_DISEASE-RESISTANCE_LOCUS_RECEPTOR-LIKE_PROTEIN_KINASE-like_1.2_isoform_X2_[Coffea_arabica]	663	72087	412	0	594		CDO98412.1	933	73.724	392	0	582
jcf7180007761265.g8951	413	XP_027095558.1_lysine_histidine_transporter-like_6_[Coffea_arabica]	439	86582	395	0	694		CDP00586.1	439	86.582	395	0	694
jcf7180007761341.g8961	357	XP_027120936.1_pto-interacting_protein_1-like_[Coffea_arabica]	361	90476	336	0	602		CDO98701.1	361	90.179	336	0	598
jcf7180007761341.g8962	479	XP_027120934.1_LOW_QUALITY_PROTEIN:_probable_receptor-like_protein_kinase_At5g18500_[Coffea_arabica]	492	84247	438	0	766		CDO98700.1	522	80.594	438	0	720
jcf7180007761388.g8967	536	XP_027088135.1_uncharacterized_protein_LOC113709547_isoform_X2_[Coffea_arabica]	883	63043	506	0	589		CDP17325.1	877	62.103	504	0	570
jcf7180007761408.g8969	476	XP_027120307.1_ATP-dependent_Clp_protease_ATP-binding_subunit_ClpA_homolog_CD4B,_chloroplastic-like_[Coffea_arabica]	642	56582	509	0	536		CDP20146.1	584	50.957	575	4.04e-177	513
jcf7180007761434.g8975	386	XP_027075387.1_uncharacterized_protein_LOC113699307_isoform_X2_[Coffea_arabica]	1032	65854	410	0	564		CDP01788.1	1065	65.509	403	0	550
jcf7180007761450.g8976	677	XP_027111730.1_metal-nicotianamine_transporter_YSL1-like_[Coffea_arabica]	698	75184	681	0	1077		CDO99601.1	678	75.184	681	0	1077
jcf7180007761536.g8984	414	XP_027105668.1_amino_acid_permease_4-like_[Coffea_arabica]	512	88406	414	0	773		CDO96925.1	512	88.406	414	0	773
jcf7180007761547.g8987	305	XP_027088846.1_DNA-directed_RNA_polymerase_III_subunit_1-like_isoform_X5_[Coffea_arabica]	1221	87333	300	0	553		CDP06311.1	312	83.333	126	6e-67	214
jcf7180007761602.g8996	543	XP_027104420.1_LOW_QUALITY_PROTEIN:_AP3-complex_subunit_beta-A_[Coffea_arabica]	1154	70092	545	0	720		CDP00104.1	1142	71.56	545	0	739
jcf7180007761801.g9024	666	XP_027078332.1_NADH_dehydrogenase_[ubiquinone]_iron-sulfur_protein_1,_mitochondrial_[Coffea_arabica]	744	85037	675	0	1136		CDP01652.1	657	85.714	588	0	1001
jcf7180007761801.g9025	419	XP_027078461.1_nicastrin-like_isoform_X2_[Coffea_arabica]	667	74286	420	0	636		CDP01653.1	618	74.286	420	0	636
jcf7180007761807.g9030	524	XP_027111956.1_nucleobase-ascorbate_transporter_2_[Coffea_arabica]	524	95038	524	0	1026		CDO96816.1	524	95.229	524	0	1026
jcf7180007761879.g9036	888	XP_027093688.1_uncharacterized_protein_LOC113714087_[Coffea_arabica]	1102	44671	835	0	639
jcf7180007761900.g9039	598	XP_027091830.1_protein_NRT1/_PTR_FAMILY_8.2-like_[Coffea_arabica]	622	72589	591	0	883		CDP07455.1	622	72.42	591	0	880
jcf7180007761931.g9042	437	XP_027111286.1_eukaryotic_peptide_chain_release_factor_subunit_1-3_[Coffea_arabica]	437	96110	437	0	877		CDO99928.1	474	89.703	437	0	798
jcf7180007761975.g9046	623	XP_027091484.1_V-type_proton_ATPase_subunit_a3-like_[Coffea_arabica]	813	77329	644	0	1003		CDP07451.1	808	77.174	644	0	1002
jcf7180007761993.g9049	903	XP_027117359.1_DNA_mismatch_repair_protein_PMS1-like_isoform_X1_[Coffea_arabica]	932	66992	921	0	1204		CDP03504.1	927	66.523	929	0	1205
jcf7180007762022.g9052	394	XP_027095682.1_APO_protein_3,_mitochondrial-like_[Coffea_arabica]	396	74805	385	0	593		CDP14098.1	396	74.805	385	0	595
jcf7180007762047.g9055	821	XP_027095750.1_putative_pentatricopeptide_repeat-containing_protein_At1g13630_isoform_X1_[Coffea_arabica]	832	57452	832	0	954		CDP00488.1	843	57.572	832	0	956
jcf7180007762102.g9057	571	XP_027123892.1_rust_resistance_kinase_Lr10-like_[Coffea_arabica]	646	60727	550	0	611		CDP17831.1	624	51.005	547	1.83e-173	509
jcf7180007762102.g9058	722	XP_027110107.1_rust_resistance_kinase_Lr10-like_[Coffea_arabica]	662	68875	649	0	922		CDP05079.1	612	63.793	638	0	817
jcf7180007762177.g9063	408	XP_027103951.1_BAG_family_molecular_chaperone_regulator_7-like_isoform_X2_[Coffea_arabica]	424	70118	425	0	568		CDP05326.1	424	69.882	425	0	563
jcf7180007762216.g9068	458	XP_027121116.1_anaphase-promoting_complex_subunit_7_[Coffea_arabica]	563	87931	406	0	684		CDO98897.1	563	87.685	406	0	683
jcf7180007762217.g9069	319	XP_027076346.1_isocitrate_dehydrogenase_[NADP]_isoform_X1_[Coffea_arabica]	416	95597	318	0	646		CDP01688.1	416	95.597	318	0	646
jcf7180007762230.g9072	826	XP_027111072.1_receptor-like_protein_kinase_THESEUS_1_[Coffea_arabica]	833	77820	798	0	1266		CDP00040.1	833	77.82	798	0	1252
jcf7180007762261.g9076	514	XP_027086651.1_uncharacterized_protein_LOC113708387_[Coffea_arabica]	562	67583	509	0	717		CDP08927.1	348	72.822	287	3.39e-158	457
jcf7180007762269.g9077	491	XP_027081590.1_geraniol_8-hydroxylase-like_[Coffea_arabica]	532	61734	473	0	642		CDP09894.1	971	62.368	473	0	646
jcf7180007762282.g9078	471	XP_027105296.1_serine/threonine-protein_kinase_HT1-like_[Coffea_arabica]	505	82278	474	0	808		CDO99532.1	505	82.278	474	0	808
jcf7180007762294.g9080	454	XP_027072777.1_transcription_factor_MYB3R-5_[Coffea_arabica]	560	64316	468	0	571		CDP06612.1	549	64.316	468	0	571
jcf7180007762304.g9081	783	XP_027067068.1_uncharacterized_protein_LOC113692743_[Coffea_arabica]	779	74304	790	0	1179		CDP10577.1	742	72.357	785	0	1139
jcf7180007762357.g9089	601	XP_027104872.1_glycosyltransferase_family_protein_64_protein_C5-like_[Coffea_arabica]	780	84526	601	0	1066		CDO99835.1	751	84.692	601	0	1069
jcf7180007762363.g9090	773	XP_027081529.1_pentatricopeptide_repeat-containing_protein_At4g32450,_mitochondrial-like_[Coffea_arabica]	731	58065	620	0	697		CDP04791.1	731	57.742	620	0	692
jcf7180007762372.g9091	454	XP_027105607.1_uncharacterized_protein_LOC113726214_[Coffea_arabica]	507	80130	463	0	767		CDO96869.1	461	83.771	419	0	746
jcf7180007762402.g9093	569	XP_027084354.1_histidine_kinase_5-like_[Coffea_arabica]	1023	65273	550	0	662		CDP14472.1	1019	65.273	550	0	658
jcf7180007762433.g9094	346	XP_027072393.1_F-box/kelch-repeat_protein_At2g44130-like_[Coffea_arabica]	343	75439	342	0	551		CDP14290.1	343	74.854	342	0	548
jcf7180007762498.g9100	711	XP_027070180.1_pentatricopeptide_repeat-containing_protein_At5g12100,_mitochondrial-like_[Coffea_arabica]	822	67232	708	0	1001		CDP15351.1	817	67.232	708	0	1000
jcf7180007762587.g9113	864	XP_027068601.1_probable_alpha,alpha-trehalose-phosphate_synthase_[UDP-forming]_11_[Coffea_arabica]	867	85484	868	0	1564		CDP02920.1	867	85.484	868	0	1564
jcf7180007762653.g9116	273	XP_027115262.1_CAAX_prenyl_protease_1_homolog_[Coffea_arabica]	424	94505	273	0	535		CDP08773.1	424	94.872	273	0	538
jcf7180007762708.g9119	736	XP_027095650.1_HIPL1_protein-like_isoform_X1_[Coffea_arabica]	692	74096	691	0	1071		CDP00262.1	690	75.111	675	0	1063
jcf7180007762708.g9120	746	XP_027095649.1_pentatricopeptide_repeat-containing_protein_At1g05670,_mitochondrial_[Coffea_arabica]	752	71198	743	0	1119		CDP00261.1	752	71.198	743	0	1119
jcf7180007762726.g9123	419	XP_027105069.1_uncharacterized_protein_LOC113725866_[Coffea_arabica]	417	77123	424	0	612		CDP19908.1	417	77.123	424	0	612
jcf7180007762728.g9124	558	XP_027094449.1_protein_DETOXIFICATION_48-like_[Coffea_arabica]	576	79483	580	0	893		CDP21676.1	555	80.708	565	0	882
jcf7180007762741.g9125	718	XP_027114242.1_putative_late_blight_resistance_protein_homolog_R1A-3_[Coffea_arabica]	890	60899	734	0	863		CDP18959.1	890	60.899	734	0	863
jcf7180007762781.g9132	471	XP_027126006.1_protein_NRDE2_homolog_[Coffea_arabica]	1166	74398	457	0	673		CDO98626.1	1166	73.961	457	0	667
jcf7180007762823.g9141	701	XP_027123221.1_ABC_transporter_G_family_member_11_[Coffea_arabica]	706	92351	706	0	1325		CDP18516.1	679	88.952	706	0	1261
jcf7180007762853.g9144	665	XP_027098005.1_probable_alpha,alpha-trehalose-phosphate_synthase_[UDP-forming]_9_[Coffea_arabica]	859	80286	700	0	1167		CDP00187.1	858	80.429	700	0	1168
jcf7180007762895.g9148	401	XP_027093352.1_protein_WHAT'S_THIS_FACTOR_1_homolog,_chloroplastic-like_[Coffea_arabica]	420	81299	385	0	622		CDP01068.1	413	80.519	385	0	620
jcf7180007762927.g9153	565	XP_027063928.1_putative_pentatricopeptide_repeat-containing_protein_At1g53330_[Coffea_arabica]	408	70241	373	0	546		CDP06026.1	470	72.644	435	0	631
jcf7180007762927.g9154	382	XP_027062508.1_anaphase-promoting_complex_subunit_6-like_[Coffea_arabica]	551	81075	428	0	702		CDP06025.1	551	80.607	428	0	699
jcf7180007763057.g9161	554	XP_027110429.1_xyloglucan_galactosyltransferase_XLT2-like_[Coffea_arabica]	504	69478	498	0	683		CDP05281.1	500	68.813	497	0	686
jcf7180007763183.g9169	437	XP_027069435.1_lipid_phosphate_phosphatase_delta_[Coffea_arabica]	407	72277	404	0	603		CDP14282.1	407	72.772	404	0	605
jcf7180007763221.g9184	534	XP_027113234.1_zinc_finger_CCCH_domain-containing_protein_40-like_[Coffea_arabica]	546	78354	559	0	787		CDO97607.1	498	92.927	410	0	759
jcf7180007763259.g9194	707	XP_027120893.1_uncharacterized_protein_LOC113737958_[Coffea_arabica]	1302	48382	618	0	558
jcf7180007763315.g9203	430	XP_027127297.1_G-type_lectin_S-receptor-like_serine/threonine-protein_kinase_At4g27290_isoform_X1_[Coffea_arabica]	827	63146	426	0	570		CDP05837.1	849	60.748	428	0	543
jcf7180007763403.g9221	452	XP_027118782.1_UDP-glycosyltransferase_74E1-like_[Coffea_arabica]	458	58553	456	0	555		CDP08078.1	427	55.142	457	3.37e-177	506
jcf7180007763405.g9222	548	XP_027096962.1_uncharacterized_protein_LOC113716742_[Coffea_arabica]	560	78707	526	0	873		CDP00730.1	560	78.897	526	0	875
jcf7180007763410.g9225	364	XP_027077678.1_ferredoxin--NADP_reductase,_leaf-type_isozyme,_chloroplastic_[Coffea_arabica]	363	88187	364	0	647		CDP01892.1	363	88.462	364	0	649
jcf7180007763429.g9230	1064	XP_027083863.1_receptor-like_protein_Cf-9_homolog_[Coffea_arabica]	1012	45240	1061	0	828		CDP08327.1	953	43.45	1061	0	774
jcf7180007763517.g9252	345	XP_027089032.1_regulator_of_nonsense_transcripts_UPF2-like_[Coffea_arabica]	1195	91570	344	0	661		CDP04324.1	1191	91.279	344	0	660
jcf7180007763529.g9256	551	XP_027114761.1_phospholipase_D_zeta_1-like_isoform_X1_[Coffea_arabica]	1069	74118	510	0	795		CDP17221.1	1069	74.706	510	0	801
jcf7180007763580.g9273	577	XP_027080959.1_polyadenylate-binding_protein-interacting_protein_7-like_[Coffea_arabica]	573	80277	578	0	949		CDP13485.1	573	79.758	578	0	944
jcf7180007763648.g9290	1159	XP_027122043.1_uncharacterized_protein_LOC113738985_[Coffea_arabica]	1627	37178	1318	0	868		CDO99984.1	847	39.929	566	2e-141	451
jcf7180007763727.g9304	332	XP_027110222.1_putative_septum_site-determining_protein_minD_homolog,_chloroplastic_[Coffea_arabica]	337	86431	339	0	546		CDP05146.1	337	86.136	339	0	545
jcf7180007763745.g9308	621	XP_027077709.1_filament-like_plant_protein_7_[Coffea_arabica]	1065	58735	601	0	649		CDP02513.1	1065	58.569	601	0	649
jcf7180007763855.g9316	416	XP_027090595.1_pentatricopeptide_repeat-containing_protein_At3g02650,_mitochondrial-like_[Coffea_arabica]	639	66337	404	0	555		CDP11002.1	638	65.842	404	0	545
jcf7180007763928.g9326	768	XP_027068101.1_pentatricopeptide_repeat-containing_protein_At4g30700-like_[Coffea_arabica]	793	73446	772	0	1183		CDP02835.1	793	73.316	772	0	1181
jcf7180007763955.g9328	444	XP_027095624.1_E3_ubiquitin_protein_ligase_DRIP2_isoform_X1_[Coffea_arabica]	428	81081	444	0	725		CDP03700.1	428	80.856	444	0	723
jcf7180007764117.g9341	605	XP_027103725.1_scarecrow-like_protein_8_[Coffea_arabica]	708	63249	634	0	632		CDP05160.1	705	63.55	631	0	633
jcf7180007764146.g9345	914	XP_027075364.1_paired_amphipathic_helix_protein_Sin3-like_2_[Coffea_arabica]	1372	86136	880	0	1462		CDP02173.1	1370	86.25	880	0	1467
jcf7180007764161.g9346	588	XP_027100295.1_DEAD-box_ATP-dependent_RNA_helicase_35_[Coffea_arabica]	590	92699	589	0	1114		CDP16968.1	590	93.548	589	0	1133
jcf7180007764254.g9357	389	XP_027093123.1_abscisic_acid_8'-hydroxylase_CYP707A1-like_[Coffea_arabica]	485	79177	389	0	650		CDP01362.1	431	79.434	389	0	652
jcf7180007764276.g9364	396	XP_027080961.1_protein_argonaute_4-like_[Coffea_arabica]	919	82872	397	0	697		CDP09667.1	868	82.62	397	0	696
jcf7180007764355.g9368	429	XP_027087967.1_ankyrin_repeat-containing_protein_At5g02620-like_[Coffea_arabica]	544	65967	429	0	564		CDP08980.1	541	65.967	429	0	564
jcf7180007764371.g9369	1413	XP_027123921.1_protein_MODIFIER_OF_SNC1_1-like_[Coffea_arabica]	1549	55932	1416	0	1343		CDP16935.1	1267	55.965	1274	0	1207
jcf7180007764375.g9370	433	XP_027066191.1_adenylate_kinase_5,_chloroplastic_isoform_X1_[Coffea_arabica]	596	80292	411	0	675		CDP10519.1	579	80.292	411	0	675
jcf7180007764507.g9384	361	XP_027108254.1_probable_cinnamyl_alcohol_dehydrogenase_1_[Coffea_arabica]	355	80563	355	0	575		CDP08884.1	355	80.563	355	0	575
jcf7180007764509.g9386	672	XP_027078057.1_inactive_TPR_repeat-containing_thioredoxin_TTL3-like_[Coffea_arabica]	720	72700	674	0	952		CDP01439.1	702	71.045	670	0	919
jcf7180007764582.g9395	475	XP_027085769.1_U3_snoRNP-associated_protein-like_EMB2271_[Coffea_arabica]	531	68125	480	0	632		CDP05614.1	533	68.257	482	0	632
jcf7180007764608.g9398	538	XP_027076586.1_uncharacterized_protein_LOC113700354_isoform_X3_[Coffea_arabica]	679	83178	428	0	689		CDP02445.1	787	83.411	428	0	689
jcf7180007764654.g9407	596	XP_027066877.1_transmembrane_9_superfamily_member_8-like_[Coffea_arabica]	619	89916	595	0	1107		CDP10238.1	642	89.916	595	0	1107
jcf7180007764707.g9413	579	XP_027069405.1_structural_maintenance_of_chromosomes_protein_2-1-like_[Coffea_arabica]	1176	75039	641	0	931		CDP14281.1	1176	75.039	641	0	936
jcf7180007764751.g9416	552	XP_027063924.1_autophagy-related_protein_18f_[Coffea_arabica]	891	70471	552	0	750		CDP05803.1	891	70.471	552	0	751
jcf7180007764808.g9420	679	XP_027121109.1_uncharacterized_protein_LOC113738122_[Coffea_arabica]	1686	53247	693	0	577		CDO98886.1	1677	52.555	685	0	564
jcf7180007764855.g9430	433	XP_027094847.1_DEAD-box_ATP-dependent_RNA_helicase_39-like_[Coffea_arabica]	660	82609	437	0	710		CDP01130.1	515	93.706	286	0	570
jcf7180007764900.g9432	563	XP_027079167.1_uncharacterized_protein_LOC113702252_[Coffea_arabica]	1158	63107	515	0	603		CDP04588.1	1110	58.891	523	0	556
jcf7180007764900.g9433	639	XP_027079167.1_uncharacterized_protein_LOC113702252_[Coffea_arabica]	1158	67344	640	0	889		CDP04588.1	1110	67.188	640	0	888
jcf7180007764985.g9444	804	XP_027097231.1_uncharacterized_protein_LOC113716896_isoform_X1_[Coffea_arabica]	1074	52461	772	0	695		CDP16861.1	747	50	732	0	613
jcf7180007765018.g9447	432	XP_027123858.1_potassium_transporter_2-like_isoform_X2_[Coffea_arabica]	721	73148	432	0	671		CDO98657.1	790	72.872	376	0	581
jcf7180007765045.g9448	362	XP_027078041.1_U-box_domain-containing_protein_21-like_[Coffea_arabica]	442	73529	340	0	528		CDP01660.1	442	72.353	340	0	520
jcf7180007765104.g9463	490	XP_027087902.1_acetolactate_synthase_small_subunit_1,_chloroplastic-like_[Coffea_arabica]	498	69421	484	0	617		CDP04139.1	451	76.499	417	0	613
jcf7180007765107.g9464	590	XP_027085506.1_ruBisCO_large_subunit-binding_protein_subunit_alpha_[Coffea_arabica]	589	89267	587	0	1041		CDP07072.1	589	88.075	587	0	1024
jcf7180007765141.g9466	651	XP_027088014.1_dammarenediol_II_synthase-like_[Coffea_arabica]	761	78462	650	0	1110		CDP12624.1	761	78.462	650	0	1110
jcf7180007765181.g9470	401	XP_027085796.1_patatin-like_protein_2_[Coffea_arabica]	405	72335	394	0	574		CDP04311.1	405	72.335	394	0	574
jcf7180007765307.g9481	536	XP_027099393.1_uncharacterized_protein_LOC113718698_[Coffea_arabica]	588	74296	533	0	769		CDP00168.1	589	73.921	533	0	759
jcf7180007765318.g9482	420	XP_027098145.1_aldehyde_dehydrogenase_family_2_member_B7,_mitochondrial-like_[Coffea_arabica]	537	75911	494	0	770		CDP00179.1	538	75.911	494	0	768
jcf7180007765397.g9494	441	XP_027068638.1_pollen_receptor-like_kinase_3_[Coffea_arabica]	650	67494	443	0	572		CDO97732.1	672	41.149	435	2.02e-92	296
jcf7180007765416.g9496	347	XP_027103889.1_gibberellin_20_oxidase_1-D-like_isoform_X1_[Coffea_arabica]	406	74935	383	0	603		CDP05268.1	384	74.935	383	0	602
jcf7180007765470.g9503	385	XP_027105250.1_trafficking_protein_particle_complex_subunit_13-like_[Coffea_arabica]	439	80899	356	0	596		CDO99569.1	439	80.899	356	0	596
jcf7180007765472.g9504	639	XP_027122643.1_uncharacterized_protein_LOC113739584_isoform_X1_[Coffea_arabica]	2397	61192	621	0	732		CDO97727.1	2398	65.241	561	0	733
jcf7180007765472.g9505	1500	XP_027124629.1_uncharacterized_protein_LOC113741320_isoform_X4_[Coffea_arabica]	2161	51707	1640	0	1416		CDO97727.1	2398	51.802	1637	0	1414
jcf7180007765492.g9508	499	XP_027086090.1_potassium_transporter_11-like_[Coffea_arabica]	790	86172	499	0	870		CDP11269.1	790	86.172	499	0	870
jcf7180007765527.g9511	406	XP_027105226.1_splicing_factor_3B_subunit_2-like_[Coffea_arabica]	596	93277	357	0	632		CDO99587.1	595	93.539	356	0	633
jcf7180007765564.g9513	644	XP_027095720.1_glutamate_decarboxylase_4-like_[Coffea_arabica]	528	84439	437	0	758		CDP05423.1	495	81.573	445	0	735
jcf7180007765568.g9514	698	XP_027074441.1_U-box_domain-containing_protein_5_isoform_X2_[Coffea_arabica]	729	55932	590	0	603		CDP02009.1	729	55.932	590	0	603
jcf7180007765660.g9522	466	XP_027117798.1_polygalacturonase_At1g48100-like_[Coffea_arabica]	494	81002	479	0	787		CDP07996.1	494	81.002	479	0	788
jcf7180007765686.g9524	353	XP_027090380.1_zinc_transporter_6,_chloroplastic-like_[Coffea_arabica]	347	78249	354	0	534		CDP09221.1	345	76.771	353	0	531
jcf7180007765739.g9528	942	XP_027070050.1_putative_disease_resistance_protein_At1g50180_[Coffea_arabica]	984	54980	984	0	1002		CDP10112.1	955	55.738	976	0	991
jcf7180007765802.g9531	472	XP_027070019.1_zeatin_O-xylosyltransferase-like_[Coffea_arabica]	498	55230	478	0	534		CDP14134.1	478	53.474	475	1.19e-179	516
jcf7180007765816.g9533	1373	XP_027070742.1_ARF_guanine-nucleotide_exchange_factor_GNL2-like_[Coffea_arabica]	1377	75872	1376	0	2210		CDP03351.1	1377	75.872	1376	0	2212
jcf7180007765849.g9541	883	XP_027126944.1_protein_SPA1-RELATED_4-like_[Coffea_arabica]	880	79911	901	0	1396		CDP05923.1	715	77.21	724	0	1061
jcf7180007765855.g9544	400	XP_027100342.1_probable_pectate_lyase_5_[Coffea_arabica]	400	89948	388	0	713		CDP13269.1	400	89.948	388	0	709
jcf7180007765869.g9549	462	XP_027069864.1_UDP-glycosyltransferase_71K1-like_[Coffea_arabica]	471	63812	467	0	617		CDP06220.1	471	63.383	467	0	616
jcf7180007765917.g9551	383	XP_027116743.1_probable_pectate_lyase_8_[Coffea_arabica]	452	89189	370	0	686		CDO99404.1	452	89.459	370	0	689
jcf7180007765968.g9555	595	XP_027104683.1_uncharacterized_protein_LOC113725617_[Coffea_arabica]	743	65116	602	0	746		CDO99949.1	743	64.95	602	0	744
jcf7180007765974.g9556	561	XP_027088729.1_probable_beta-D-xylosidase_5_[Coffea_arabica]	810	66667	423	0	599		CDP06334.1	781	66.667	423	0	599
jcf7180007766097.g9574	565	XP_027065312.1_synaptotagmin-5-like_[Coffea_arabica]	566	87943	564	0	1038		CDP10470.1	566	87.943	564	0	1038
jcf7180007766178.g9584	386	XP_027123501.1_probable_beta-1,4-xylosyltransferase_IRX10L_[Coffea_arabica]	418	97632	380	0	774		CDO98298.1	418	97.632	380	0	774
jcf7180007766200.g9591	714	XP_027089255.1_PHD_finger_protein_At1g33420-like_[Coffea_arabica]	716	78670	722	0	1170		CDP21393.1	716	78.947	703	0	1154
jcf7180007766202.g9592	493	XP_027112481.1_protein_CYPRO4-like_[Coffea_arabica]	646	90669	493	0	953		CDO97174.1	646	90.669	493	0	952
jcf7180007766228.g9595	660	XP_027069654.1_probable_protein_phosphatase_2C_4_[Coffea_arabica]	638	77096	668	0	988		CDP06616.1	615	75.225	666	0	953
jcf7180007766229.g9596	391	XP_027082763.1_puromycin-sensitive_aminopeptidase-like_isoform_X1_[Coffea_arabica]	980	69767	473	0	648		CDP12042.1	490	69.379	467	0	629
jcf7180007766245.g9597	910	XP_027069344.1_calcium-transporting_ATPase_4,_plasma_membrane-type-like_[Coffea_arabica]	1058	73367	995	0	1429		CDP14148.1	1006	72.764	995	0	1413
jcf7180007766333.g9607	727	XP_027078700.1_ABC_transporter_G_family_member_17-like_[Coffea_arabica]	725	82305	729	0	1244		CDP02683.1	729	81.284	732	0	1229
jcf7180007766339.g9609	922	XP_027063826.1_disease_resistance_protein_RPM1-like_[Coffea_arabica]	910	67763	912	0	1273		CDP18957.1	910	68.202	912	0	1273
jcf7180007766363.g9613	584	XP_027067319.1_uncharacterized_protein_LOC113692911_[Coffea_arabica]	1815	50947	581	0	607		CDO99984.1	847	53.631	179	6.33e-57	206
jcf7180007766401.g9620	1057	XP_027067906.1_ABC_transporter_G_family_member_32-like_isoform_X1_[Coffea_arabica]	1420	84171	1055	0	1801		CDP03382.1	1420	84.171	1055	0	1801
jcf7180007766454.g9627	337	XP_027064265.1_imidazole_glycerol_phosphate_synthase_hisHF,_chloroplastic-like_[Coffea_arabica]	595	88050	318	0	570
jcf7180007766458.g9628	536	XP_027081169.1_auxin_response_factor_9-like_isoform_X1_[Coffea_arabica]	693	75419	537	0	797		CDP12183.1	693	75.419	537	0	799
jcf7180007766466.g9629	784	XP_027093769.1_LOW_QUALITY_PROTEIN:_26S_proteasome_regulatory_subunit_4_homolog_A-like_[Coffea_arabica]	444	99517	414	0	830		CDP03836.1	444	99.517	414	0	830
jcf7180007766484.g9630	572	XP_027114242.1_putative_late_blight_resistance_protein_homolog_R1A-3_[Coffea_arabica]	890	55326	582	0	582		CDP18959.1	890	55.155	582	0	582
jcf7180007766526.g9633	558	XP_027073865.1_catalase_isozyme_1_[Coffea_arabica]	492	85072	489	0	872		CDP01803.1	492	85.072	489	0	872
jcf7180007766548.g9641	370	XP_027095177.1_F-box_protein_SKP2A-like_[Coffea_arabica]	369	82656	369	0	606		CDP11983.1	369	82.385	369	0	605
jcf7180007766604.g9651	442	XP_027084687.1_adenylyltransferase_and_sulfurtransferase_MOCS3-like_[Coffea_arabica]	479	69375	480	0	655		CDP07189.1	479	69.375	480	0	652
jcf7180007766608.g9652	378	XP_027081301.1_5-amino-6-(5-phospho-D-ribitylamino)uracil_phosphatase,_chloroplastic_[Coffea_arabica]	374	76253	379	0	567		CDP09739.1	372	76.517	379	0	561
jcf7180007766796.g9673	413	XP_027065138.1_protein_RICE_SALT_SENSITIVE_3-like_isoform_X1_[Coffea_arabica]	408	91304	414	0	758		CDP05942.1	408	91.304	414	0	758
jcf7180007766848.g9678	337	XP_027115880.1_uncharacterized_protein_LOC113733868_[Coffea_arabica]	831	82704	318	0	568		CDO98752.1	800	82.075	318	0	563
jcf7180007766852.g9679	723	XP_027090268.1_uncharacterized_protein_LOC113711298_isoform_X2_[Coffea_arabica]	1309	47415	793	0	637		CDP09207.1	1211	48.231	763	0	646
jcf7180007766871.g9686	944	XP_027116799.1_ubiquitin_carboxyl-terminal_hydrolase_2-like_isoform_X1_[Coffea_arabica]	1066	51734	1009	0	893		CDP11123.1	1079	51.833	1009	0	895
jcf7180007767111.g9711	716	XP_027114013.1_putative_disease_resistance_RPP13-like_protein_1_[Coffea_arabica]	1248	47552	776	0	594		CDP20254.1	1198	45.862	737	2.28e-180	550
jcf7180007767114.g9713	1008	XP_027074603.1_thyroid_adenoma-associated_protein_homolog_[Coffea_arabica]	1511	64747	1007	0	1312		CDP02224.1	2203	64.683	1008	0	1310
jcf7180007767127.g9715	289	XP_027068715.1_ferredoxin-dependent_glutamate_synthase,_chloroplastic_[Coffea_arabica]	1626	93080	289	0	550		CDP09547.1	1627	93.08	289	0	550
jcf7180007767129.g9716	543	XP_027125484.1_uncharacterized_protein_LOC113742005_isoform_X1_[Coffea_arabica]	505	68349	436	0	534		CDO97794.1	505	68.349	436	0	535
jcf7180007767131.g9717	390	XP_027115768.1_polygalacturonase-like_[Coffea_arabica]	391	74359	390	0	612		CDP19167.1	391	74.359	390	0	613
jcf7180007767201.g9724	1266	XP_027064827.1_pentatricopeptide_repeat-containing_protein_At5g55840-like_[Coffea_arabica]	1156	64669	1118	0	1499		CDP13708.1	1156	64.311	1118	0	1493
jcf7180007767204.g9725	453	XP_027081464.1_ABC_transporter_E_family_member_2_[Coffea_arabica]	410	96341	410	0	825		CDP07208.1	606	96.372	441	0	884
jcf7180007767242.g9730	558	XP_027078373.1_probable_galacturonosyltransferase_9_[Coffea_arabica]	565	83009	565	0	943		CDP02368.1	565	82.655	565	0	941
jcf7180007767291.g9735	405	XP_027116400.1_acylamino-acid-releasing_enzyme_[Coffea_arabica]	853	73096	394	0	565		CDO99144.1	853	73.096	394	0	564
jcf7180007767291.g9736	985	XP_027116399.1_pentatricopeptide_repeat-containing_protein_At3g23020_[Coffea_arabica]	938	64730	981	0	1276		CDO99142.1	671	75.075	670	0	1069
jcf7180007767359.g9743	652	XP_027084986.1_transmembrane_9_superfamily_member_11_[Coffea_arabica]	662	82710	642	0	1109		CDP18796.1	663	82.866	642	0	1111
jcf7180007767381.g9746	491	XP_027088073.1_EH_domain-containing_protein_2-like_isoform_X1_[Coffea_arabica]	550	80684	497	0	803		CDP04464.1	581	75.568	528	0	789
jcf7180007767496.g9755	471	XP_027062129.1_uncharacterized_protein_LOC113688501_[Coffea_arabica]	471	82166	471	0	826		CDP06035.1	470	82.166	471	0	825
jcf7180007767619.g9773	522	XP_027090215.1_U-box_domain-containing_protein_44-like_[Coffea_arabica]	1040	69863	511	0	720		CDP09203.1	1040	70.611	507	0	721
jcf7180007767631.g9778	699	XP_027082864.1_transcription_factor_LHW-like_isoform_X3_[Coffea_arabica]	966	63688	705	0	842		CDP15550.1	927	60.508	709	0	793
jcf7180007767639.g9779	564	XP_027070491.1_ABC_transporter_B_family_member_1_[Coffea_arabica]	1409	73656	558	0	796		CDP06775.1	1246	87.435	382	0	688
jcf7180007767705.g9788	554	XP_027085780.1_receptor-like_serine/threonine-protein_kinase_NCRK_isoform_X2_[Coffea_arabica]	563	71375	531	0	722		CDP07091.1	638	70.709	536	0	717
jcf7180007767776.g9798	325	XP_027115851.1_galactinol_synthase_2-like_isoform_X2_[Coffea_arabica]	344	75660	341	0	545		CDO98726.1	341	75.66	341	0	545
jcf7180007767817.g9802	401	XP_027070298.1_bZIP_transcription_factor_TGA10-like_isoform_X2_[Coffea_arabica]	525	85286	367	0	607		CDP10109.1	432	84.553	369	0	599
jcf7180007767820.g9803	682	XP_027115380.1_mitogen-activated_protein_kinase_kinase_kinase_7-like_[Coffea_arabica]	680	74047	682	0	1072		CDP08715.1	605	73.967	484	0	740
jcf7180007767851.g9806	641	XP_027123954.1_leucine-rich_repeat_receptor-like_serine/threonine/tyrosine-protein_kinase_SOBIR1_[Coffea_arabica]	649	76755	641	0	978		CDP15096.1	646	76.755	641	0	973
jcf7180007768002.g9821	520	XP_027066918.1_transcription_factor_bHLH140-like_[Coffea_arabica]	802	53061	637	0	577		CDP06455.1	802	53.061	637	0	576
jcf7180007768003.g9825	543	XP_027112582.1_beta-D-glucosyl_crocetin_beta-1,6-glucosyltransferase-like_[Coffea_arabica]	446	63596	445	0	596		CDO99872.1	442	63.146	445	0	593
jcf7180007768017.g9826	539	XP_027102718.1_phosphate-repressible_phosphate_permease_pho-4-like_[Coffea_arabica]	696	62615	543	0	677		CDO96858.1	583	67.577	549	0	757
jcf7180007768025.g9827	521	XP_027100655.1_protein_FAR1-RELATED_SEQUENCE_9-like_[Coffea_arabica]	576	68713	505	0	678		CDP08742.1	260	37.778	90	2.99e-17	81.6
jcf7180007768107.g9831	370	XP_027116803.1_purple_acid_phosphatase_15-like_[Coffea_arabica]	547	86141	368	0	699		CDP11126.1	542	85.87	368	0	697
jcf7180007768132.g9837	378	XP_027086365.1_protein_TRIGALACTOSYLDIACYLGLYCEROL_2,_chloroplastic-like_isoform_X2_[Coffea_arabica]	390	70185	379	0	526		CDP04090.1	390	69.393	379	0	519
jcf7180007768168.g9841	558	XP_027073298.1_probable_acyl-activating_enzyme_6_[Coffea_arabica]	589	79928	558	0	935		CDP01726.1	563	79.928	558	0	933
jcf7180007768192.g9843	611	XP_027089258.1_glutamate--tRNA_ligase,_chloroplastic/mitochondrial-like_[Coffea_arabica]	594	74318	623	0	922		CDP14482.1	594	74.157	623	0	917
jcf7180007768195.g9845	460	XP_027120970.1_30S_ribosomal_protein_S1,_chloroplastic-like_[Coffea_arabica]	429	75107	466	0	677		CDO98727.1	429	74.034	466	0	655
jcf7180007768286.g9857	726	XP_027105520.1_uncharacterized_protein_LOC113726159_isoform_X1_[Coffea_arabica]	1889	58451	710	0	773		CDO96790.1	1887	58.31	710	0	774
jcf7180007768386.g9862	1273	XP_027115486.1_uncharacterized_protein_LOC113733333_isoform_X3_[Coffea_arabica]	2285	61544	1282	0	1536		CDP08656.1	2540	61.856	1282	0	1537
jcf7180007768391.g9863	741	XP_027111113.1_SAC3_family_protein_A-like_isoform_X1_[Coffea_arabica]	1004	68947	731	0	882		CDP00012.1	1006	69.577	733	0	884
jcf7180007768417.g9866	871	XP_027111568.1_polyadenylation_and_cleavage_factor_homolog_4-like_isoform_X2_[Coffea_arabica]	1005	60565	885	0	986		CDO99723.1	1005	60.904	885	0	991
jcf7180007768422.g9867	542	XP_027106588.1_nitrate_regulatory_gene2_protein-like_[Coffea_arabica]	888	64286	560	0	563		CDP09433.1	813	68.145	248	6.72e-84	280
jcf7180007768438.g9868	469	XP_027070019.1_zeatin_O-xylosyltransferase-like_[Coffea_arabica]	498	65152	462	0	640		CDP14137.1	453	65.342	453	0	611
jcf7180007768617.g9884	693	XP_027089535.1_oligopeptide_transporter_3-like_[Coffea_arabica]	743	73461	731	0	1090		CDP04526.1	755	71.06	736	0	1065
jcf7180007768642.g9885	326	XP_027066850.1_aspartate_aminotransferase,_cytoplasmic_[Coffea_arabica]	410	92063	315	0	612		CDP03316.1	410	92.063	315	0	613
jcf7180007768663.g9889	371	XP_027061330.1_serine/threonine-protein_kinase_EDR1-like_isoform_X4_[Coffea_arabica]	801	84140	372	0	630		CDP15939.1	810	84.409	372	0	630
jcf7180007768890.g9906	686	XP_027070491.1_ABC_transporter_B_family_member_1_[Coffea_arabica]	1409	72555	685	0	998		CDP06775.1	1246	72.555	685	0	1016
jcf7180007768891.g9907	588	XP_027087127.1_U-box_domain-containing_protein_13-like_[Coffea_arabica]	658	82931	580	0	960		CDP09042.1	658	83.276	580	0	964
jcf7180007769140.g9929	942	XP_027079224.1_uncharacterized_protein_LOC113702293_[Coffea_arabica]	945	88441	943	0	1709		CDP02446.1	945	88.547	943	0	1713
jcf7180007769144.g9930	675	XP_027114331.1_protein_NETWORKED_1D-like_[Coffea_arabica]	1694	65517	696	0	828		CDP06844.1	1614	65.429	700	0	823
jcf7180007769233.g9955	391	XP_027098584.1_nuclear_pore_complex_protein_NUP54-like_[Coffea_arabica]	385	86598	388	0	650		CDP19899.1	385	86.856	388	0	653
jcf7180007769265.g9963	557	XP_027081185.1_general_transcription_and_DNA_repair_factor_IIH_helicase_subunit_XPB1_[Coffea_arabica]	766	97072	444	0	899		CDP12051.1	753	86.409	596	0	1043
jcf7180007769286.g9967	353	XP_027084892.1_probable_inactive_ATP-dependent_zinc_metalloprotease_FTSHI_1,_chloroplastic_[Coffea_arabica]	958	87106	349	0	634		CDP12174.1	958	86.246	349	0	628
jcf7180007769298.g9969	508	XP_027111735.1_protein_MOR1_isoform_X2_[Coffea_arabica]	2030	85158	539	0	913		CDO99590.1	478	85.983	478	0	812
jcf7180007769302.g9970	505	XP_027074100.1_serine/threonine-protein_kinase_BLUS1-like_[Coffea_arabica]	688	70996	462	0	666		CDP02108.1	688	70.996	462	0	666
jcf7180007769303.g9971	867	XP_027125571.1_probable_phospholipid-transporting_ATPase_4_[Coffea_arabica]	1230	86536	869	0	1576		CDO97890.1	1230	86.536	869	0	1578
jcf7180007769306.g9972	498	XP_027122487.1_uncharacterized_protein_LOC113739464_[Coffea_arabica]	521	71020	490	0	714		CDO97816.1	521	71.02	490	0	714
jcf7180007769343.g9985	508	XP_027111950.1_calmodulin-binding_receptor_kinase_CaMRLK-like_[Coffea_arabica]	673	69182	477	0	621		CDO96814.1	325	84.034	119	7.67e-65	216
jcf7180007769428.g10004	465	XP_027076440.1_UDP-glycosyltransferase_91A1-like_[Coffea_arabica]	471	72473	465	0	706		CDP01584.1	471	72.043	465	0	705
jcf7180007769505.g10018	600	XP_027122756.1_ribonuclease_TUDOR_1-like_[Coffea_arabica]	986	88353	601	0	1100		CDO98283.1	986	88.353	601	0	1101
jcf7180007769649.g10051	748	XP_027112177.1_V-type_proton_ATPase_subunit_a3_[Coffea_arabica]	820	86230	748	0	1320		CDP20651.1	820	86.364	748	0	1323
jcf7180007769669.g10055	495	XP_027091925.1_cytochrome_P450_78A7-like_[Coffea_arabica]	540	80000	495	0	825		CDP01150.1	540	79.798	495	0	823
jcf7180007769723.g10067	926	XP_027100264.1_histidine_kinase_3-like_isoform_X2_[Coffea_arabica]	824	77159	718	0	1092		CDP13352.1	992	76.323	718	0	1082
jcf7180007770491.g10481	492	XP_027065668.1_polyol_transporter_5-like_[Coffea_arabica]	515	79878	492	0	798		CDP03333.1	504	80.372	484	0	793
jcf7180007770693.g10523	647	XP_027082735.1_probably_inactive_leucine-rich_repeat_receptor-like_protein_kinase_At2g25790_[Coffea_arabica]	968	69779	589	0	819		CDP08174.1	968	69.949	589	0	824
jcf7180007770699.g10524	782	XP_027103033.1_uncharacterized_protein_LOC113724323_[Coffea_arabica]	1251	40829	796	0	625		CDO99984.1	847	39.373	287	3.83e-66	236
jcf7180007771415.g10597	724	XP_027106456.1_transketolase,_chloroplastic_[Coffea_arabica]	745	85067	750	0	1281		CDO97702.1	745	85.2	750	0	1282
jcf7180007772875.g10660	749	XP_027099176.1_uncharacterized_protein_LOC113718472_[Coffea_arabica]	1256	44918	797	0	724		CDO99984.1	847	43.11	566	7.44e-167	506
jcf7180007775436.g10737	672	XP_027081539.1_exocyst_complex_component_EXO70A1-like_[Coffea_arabica]	675	89521	668	0	1230		CDP12452.1	677	89.004	673	0	1227
jcf7180007775801.g10748	597	XP_027071928.1_uncharacterized_protein_LOC113696744_[Coffea_arabica]	1190	44923	650	0	566		CDO99984.1	847	49.412	170	1.59e-50	187
jcf7180007778472.g10788	480	XP_027066760.1_villin-4-like_[Coffea_arabica]	965	80932	472	0	761		CDP03021.1	962	80.932	472	0	761
jcf7180007778475.g10790	787	XP_027121233.1_pentatricopeptide_repeat-containing_protein_At4g21065-like_[Coffea_arabica]	938	48963	723	0	675		CDP13130.1	737	47.444	763	0	653
jcf7180007778560.g10918	1078	XP_027066889.1_receptor-like_serine/threonine-protein_kinase_ALE2_isoform_X7_[Coffea_arabica]	1151	64052	1160	0	1268		CDP03159.1	1150	64.379	1151	0	1267
jcf7180007778563.g10921	432	XP_027102502.1_polygalacturonase_At1g48100-like_[Coffea_arabica]	462	64944	445	0	598		CDP15213.1	462	67.059	425	0	596
jcf7180007778563.g10922	714	XP_027084232.1_boron_transporter_4-like_[Coffea_arabica]	669	58841	656	0	757		CDP12423.1	716	76.495	719	0	1089
jcf7180007778566.g10930	396	XP_027103873.1_translation_initiation_factor_eIF-2B_subunit_gamma-like_[Coffea_arabica]	459	81980	394	0	642		CDP09719.1	459	81.726	394	0	640
jcf7180007778574.g10943	827	XP_027094077.1_probable_disease_resistance_protein_At4g33300_[Coffea_arabica]	830	77978	831	0	1301		CDP07611.1	731	78.689	732	0	1159
jcf7180007778580.g10954	801	XP_027119610.1_flowering_time_control_protein_FPA-like_[Coffea_arabica]	964	61710	854	0	974		CDP03488.1	964	61.241	854	0	964
jcf7180007778583.g10958	949	XP_027087419.1_protein_NLP2-like_isoform_X1_[Coffea_arabica]	954	63152	958	0	1181		CDP14498.1	823	65.249	823	0	1071
jcf7180007778605.g10986	796	XP_027083757.1_poly_[ADP-ribose]_polymerase_3-like_[Coffea_arabica]	792	72591	799	0	1202		CDP06936.1	284	80.586	273	7.69e-161	472
jcf7180007778619.g11007	323	XP_027072636.1_MACPF_domain-containing_protein_CAD1-like_[Coffea_arabica]	584	85276	326	0	587		CDP06393.1	538	84.663	326	0	581
jcf7180007778620.g11008	452	XP_027065526.1_WD_repeat-containing_protein_11-like_isoform_X1_[Coffea_arabica]	1330	78042	378	0	583		CDP10435.1	1330	78.042	378	0	582
jcf7180007778623.g11012	440	XP_027100001.1_26S_proteasome_non-ATPase_regulatory_subunit_11_homolog_[Coffea_arabica]	423	93839	422	0	773		CDP00375.1	423	93.617	423	0	773
jcf7180007778623.g11013	904	XP_027105626.1_probable_LRR_receptor-like_serine/threonine-protein_kinase_At1g07650_[Coffea_arabica]	1004	63273	1002	0	1224		CDO96888.1	1019	62.439	1017	0	1219
jcf7180007778624.g11014	463	XP_027079717.1_transcriptional_corepressor_LEUNIG_isoform_X1_[Coffea_arabica]	907	77826	460	0	629		CDP04840.1	515	77.564	312	7.11e-144	425
jcf7180007778629.g11018	1015	XP_027065641.1_protein_SMG7-like_[Coffea_arabica]	981	76986	982	0	1486		CDP09550.1	958	75.051	982	0	1434
jcf7180007778630.g11019	702	XP_027091222.1_uncharacterized_protein_LOC113712126_[Coffea_arabica]	864	50951	789	0	673		CDP04052.1	862	50.572	787	0	675
jcf7180007778634.g11028	561	XP_027072783.1_U4/U6_small_nuclear_ribonucleoprotein_PRP4-like_protein_[Coffea_arabica]	579	77102	559	0	831		CDP14190.1	385	86.441	354	0	645
jcf7180007778645.g11047	1537	XP_027083960.1_uncharacterized_protein_LOC113706289_isoform_X2_[Coffea_arabica]	2162	66601	1527	0	1999		CDP07181.1	2145	66.468	1509	0	1971
jcf7180007778646.g11048	660	XP_027071611.1_putative_leucine-rich_repeat_receptor-like_serine/threonine-protein_kinase_At2g24130_[Coffea_arabica]	984	73242	654	0	919		CDP02847.1	740	80.645	372	0	570
jcf7180007778650.g11053	427	XP_027083952.1_flotillin-like_protein_4_[Coffea_arabica]	482	81903	431	0	687		CDP18806.1	482	82.367	431	0	690
jcf7180007778651.g11055	630	XP_027084560.1_elongation_factor_G-2,_chloroplastic-like_[Coffea_arabica]	791	91892	629	0	1216		CDP09904.1	791	91.892	629	0	1216
jcf7180007778655.g11062	1069	XP_027082968.1_uncharacterized_protein_LOC113705347_[Coffea_arabica]	1714	88289	982	0	1754		CDP13537.1	1658	88.289	982	0	1755
jcf7180007778666.g11085	472	XP_027069810.1_pentatricopeptide_repeat-containing_protein_At2g36240-like_[Coffea_arabica]	479	72000	475	0	693		CDP17813.1	479	71.008	476	0	654
jcf7180007778673.g11095	688	XP_027085997.1_pentatricopeptide_repeat-containing_protein_At4g19890_[Coffea_arabica]	693	72384	688	0	1061		CDP11241.1	698	72.529	688	0	1063
jcf7180007778680.g11108	593	XP_027107424.1_trihelix_transcription_factor_GTL2-like_[Coffea_arabica]	607	56940	634	0	578		CDP08536.1	544	54.839	620	0	537
jcf7180007778688.g11136	983	XP_027096076.1_ENHANCER_OF_AG-4_protein_2-like_[Coffea_arabica]	1516	54125	994	0	832		CDP11018.1	1483	53.846	1001	0	833
jcf7180007778692.g11139	436	XP_027072973.1_uncharacterized_protein_LOC113697517_isoform_X1_[Coffea_arabica]	423	61348	445	0	519		CDP10433.1	427	60.134	449	2.28e-173	496
jcf7180007778694.g11144	724	XP_027063760.1_pentatricopeptide_repeat-containing_protein_At1g53600,_mitochondrial-like_[Coffea_arabica]	721	68889	720	0	1041		CDP06083.1	641	71.069	636	0	957
jcf7180007778695.g11145	1023	XP_027078694.1_PH,_RCC1_and_FYVE_domains-containing_protein_1-like_isoform_X1_[Coffea_arabica]	1071	66438	1022	0	1333		CDP01697.1	1071	66.047	1022	0	1326
jcf7180007778703.g11157	475	XP_027081787.1_ferrochelatase-2,_chloroplastic-like_[Coffea_arabica]	491	76471	476	0	737		CDP08238.1	491	77.521	476	0	748
jcf7180007778708.g11161	314	XP_027108152.1_pentatricopeptide_repeat-containing_protein_At1g01970_[Coffea_arabica]	416	78025	314	0	515		CDP17783.1	411	77.707	314	0	515
jcf7180007778710.g11165	471	XP_027098408.1_dihydrolipoyllysine-residue_acetyltransferase_component_4_of_pyruvate_dehydrogenase_complex,_chloroplastic-like_[Coffea_arabica]	466	83333	474	0	657		CDP19725.1	474	63.505	485	0	531
jcf7180007778712.g11169	914	XP_027086413.1_WD_repeat-containing_protein_44-like_[Coffea_arabica]	924	68737	934	0	1220		CDP11271.1	924	68.844	934	0	1221
jcf7180007778714.g11172	1602	XP_027073769.1_uncharacterized_protein_LOC113698227_[Coffea_arabica]	2587	64013	892	0	1153		CDP14592.1	2824	64.013	892	0	1153
jcf7180007778721.g11180	445	XP_027065001.1_ketol-acid_reductoisomerase,_chloroplastic-like_[Coffea_arabica]	593	92644	435	0	849		CDP15924.1	525	92.644	435	0	849
jcf7180007778727.g11188	774	XP_027069711.1_FT-interacting_protein_7-like_[Coffea_arabica]	775	92903	775	0	1516		CDP10110.1	775	92.516	775	0	1513
jcf7180007778730.g11192	920	XP_027069535.1_magnesium-chelatase_subunit_ChlH,_chloroplastic-like_isoform_X1_[Coffea_arabica]	1382	95000	880	0	1748		CDP19204.1	1397	94.545	880	0	1741
jcf7180007778730.g11193	469	XP_027069535.1_magnesium-chelatase_subunit_ChlH,_chloroplastic-like_isoform_X1_[Coffea_arabica]	1382	93418	471	0	912		CDP19204.1	1397	93.83	470	0	909
jcf7180007778732.g11197	461	XP_027115864.1_nuclear_poly(A)_polymerase_3-like_isoform_X2_[Coffea_arabica]	558	72284	451	0	691		CDO98739.1	565	72.284	451	0	690
jcf7180007778739.g11204	905	XP_027120930.1_uncharacterized_protein_LOC113737995_isoform_X1_[Coffea_arabica]	902	82508	909	0	1583		CDO98695.1	898	82.652	905	0	1575
jcf7180007778739.g11205	394	XP_027120932.1_pyruvate_dehydrogenase_(acetyl-transferring)_kinase,_mitochondrial-like_[Coffea_arabica]	369	84264	394	0	676		CDO98697.1	365	83.249	394	0	667
jcf7180007778748.g11213	433	XP_027111648.1_equilibrative_nucleotide_transporter_3-like_[Coffea_arabica]	415	78291	433	0	675		CDO99652.1	424	78.311	438	0	680
jcf7180007778755.g11225	519	XP_027105956.1_uncharacterized_protein_LOC113726438_[Coffea_arabica]	527	73194	526	0	775		CDO97186.1	527	73.194	526	0	775
jcf7180007778755.g11226	760	XP_027078334.1_subtilisin-like_protease_SBT1.9_[Coffea_arabica]	764	47638	741	0	657		CDP17236.1	761	45.74	763	0	645
jcf7180007778756.g11228	900	XP_027103469.1_serine/threonine-protein_kinase_TIO-like_isoform_X2_[Coffea_arabica]	1344	75306	899	0	1346		CDP04944.1	1345	75.306	899	0	1345
jcf7180007778758.g11231	547	XP_027075460.1_translation_factor_GUF1_homolog,_mitochondrial_isoform_X1_[Coffea_arabica]	678	92000	525	0	1013		CDP02208.1	678	92.381	525	0	1018
jcf7180007778761.g11238	475	XP_027075852.1_cytochrome_P450_CYP736A12-like_[Coffea_arabica]	498	72490	498	0	764		CDP18035.1	498	72.49	498	0	752
jcf7180007778776.g11250	584	XP_027097515.1_probable_glycosyltransferase_At3g07620_[Coffea_arabica]	503	73037	382	0	579		CDP19005.1	374	74.659	367	0	580
jcf7180007778779.g11255	498	XP_027116345.1_protein_DETOXIFICATION_55_[Coffea_arabica]	502	81250	496	0	800		CDO98843.1	502	81.25	496	0	800
jcf7180007778782.g11263	306	XP_027091327.1_short-chain_dehydrogenase/reductase_family_42E_member_1_[Coffea_arabica]	482	81188	303	0	526		CDP07258.1	482	81.188	303	0	524
jcf7180007778783.g11265	391	XP_027122796.1_stromal_processing_peptidase,_chloroplastic-like_[Coffea_arabica]	1273	88398	362	0	687		CDO98316.1	1273	88.398	362	0	687
jcf7180007778786.g11275	310	XP_027086793.1_V-type_proton_ATPase_subunit_a1-like_isoform_X2_[Coffea_arabica]	750	90615	309	0	605		CDP08938.1	825	90.645	310	0	606
jcf7180007778789.g11284	668	XP_027113911.1_L-type_lectin-domain_containing_receptor_kinase_IV.1-like_[Coffea_arabica]	672	55204	663	0	738		CDP14355.1	672	55.12	664	0	735
jcf7180007778789.g11285	499	XP_027088832.1_D-xylose-proton_symporter-like_3,_chloroplastic_[Coffea_arabica]	567	88403	457	0	771		CDP09100.1	567	89.059	457	0	776
jcf7180007778803.g11299	794	XP_027099834.1_protein_SIEVE_ELEMENT_OCCLUSION_B-like_[Coffea_arabica]	821	74659	734	0	1154		CDP13257.1	812	68.46	818	0	1144
jcf7180007778808.g11307	413	XP_027107942.1_pentatricopeptide_repeat-containing_protein_At1g09820-like_[Coffea_arabica]	609	70218	413	0	612		CDP18249.1	449	70.46	413	0	612
jcf7180007778809.g11308	765	XP_027109540.1_subtilisin-like_protease_SBT1.9_[Coffea_arabica]	761	58707	758	0	911		CDP01315.1	764	56.177	769	0	910
jcf7180007778813.g11310	511	XP_027127272.1_beta-amylase-like_[Coffea_arabica]	491	68172	487	0	713		CDP20214.1	491	68.583	487	0	713
jcf7180007778815.g11312	447	XP_027070844.1_valine--tRNA_ligase,_mitochondrial_1-like_isoform_X1_[Coffea_arabica]	1114	85545	422	0	779		CDP06726.1	1114	85.545	422	0	779
[truncated: 34,207 more rows]
