# Supplementary material for: First genomic insights into the Mandevilla genus
Source: Front Plant Sci. 2022 Aug 16;13:983879. doi: 10.3389/fpls.2022.983879 (PMC9426028; doi:10.3389/fpls.2022.983879)
Supplement: Supplementary file 6 [file Table_6.XLSX]

## Sheet: Table S3
Supplementary Table 5. Results obtained by using 10 amino acid sequences associated to enzymes involved in the biosynthesis of the three main MIAs (i.e. catharanthine, tabersonine and vincadifformine) in Catharanthus roseus (Apocynaceae) as query in a BLASTp-based approach (E-value ≤ 1e-40) against the predicted proteome of Mandevilla.
Query (Catharanthus roseus)	Abbr.	Subject (Mandevilla)	Average similarity	Alignment length	SNP	Gap open	qstart	qend	substart	subend	E-value	bit score	Query length	Subject length
AVM85920.1_hydrolase_1_[Catharanthus_roseus]	HL1	jcf7180007709631.g1209	50000	330	145	8	8	328	4	322	4.00e-100	301	330	323
AVM85921.1_hydrolase_2_[Catharanthus_roseus]	HL2	jcf7180007789215.g16850	49713	348	137	8	3	319	7	347	4.73e-105	315	320	348
AVM85922.1_hydrolase_3_[Catharanthus_roseus]	HL3	jcf7180007720920.g3620	50765	327	148	7	1	321	1	320	2.07e-109	325	321	321
AVM85923.1_hydrolase_4_[Catharanthus_roseus]	HL4	jcf7180007789215.g16850	50000	328	136	7	6	313	28	347	6.47e-097	293	314	348
AVM85916.1_geissoschizine_oxidase_[Catharanthus_roseus]	GO	jcf7180007834514.g32671	39738	458	267	5	42	495	282	734	3.55e-120	373	501	744
AVM85917.1_redox_1_[Catharanthus_roseus]	Redox1	jcf7180007788646.g16545	64756	349	123	0	5	353	12	360	4.93e-164	467	354	361
AVM85918.1_redox_2_[Catharanthus_roseus]	Redox2	jcf7180007833392.g31338	52190	274	131	0	50	323	8	281	6.12e-102	304	323	281
AVM85915.1_geissoschizine_synthase_[Catharanthus_roseus]	GS	jcf7180007801393.g20048	57423	357	150	2	3	359	2	356	4.30e-139	403	364	356
AVM85919.1_stemmadenine_O-acetyltransferase_[Catharanthus_roseus]	SAT	jcf7180007786565.g14811	44811	424	211	9	5	407	1	422	1.01e-119	359	421	433
AYE56095.1_O-acetylstemmadenine_oxidase_[Catharanthus_roseus]	ASO	jcf7180007708834.g858	48776	531	252	9	10	523	11	538	4.64e-171	499	529	551
