# Supplementary material for: First genomic insights into the Mandevilla genus
Source: Front Plant Sci. 2022 Aug 16;13:983879. doi: 10.3389/fpls.2022.983879 (PMC9426028; doi:10.3389/fpls.2022.983879)
Supplement: Supplementary file 7 [file Table_7.XLSX]

## Sheet: Foglio1
Supplementary Table 6. Effect of biallelic and triallelic polymorphisms (SNPs + INDELs) located in exonic regions (Figure 3, panel B) on the resulting proteins
	biallelic	%	triallelic	%
frameshift deletion	1700	0.0242708	266	0.169427
frameshift insertion	1135	0.0162043	67	0.0426752
frameshift substitution	0	0	7	0.0044586
nonframeshift deletion	394	0.00562512	19	0.0121019
nonframeshift insertion	304	0.00434019	12	0.00764331
nonframeshift substitution	0	0	34	0.0216561
nonsynonymous SNV	40182	0.573676	731	0.465605
stopgain	2040	0.029125	30	0.0191083
stoploss	350	0.00499693	18	0.011465
synonymous SNV	22395	0.319732	334	0.212739
unknown	1543	0.0220293	52	0.033121
